# Supplementary material for: Identification of unique and shared mitochondrial DNA mutations in neurodegeneration and cancer by single-cell mitochondrial DNA structural variation sequencing (MitoSV-seq)
Source: PubMed Central journal article supplement — eBioMedicine. 2020 Jul 3;57:102868. doi: 10.1016/j.ebiom.2020.102868 (PMC7334819; doi:10.1016/j.ebiom.2020.102868), 2020-07-03
Supplement: mmc2.pdf [file mmc2.pdf]

Supplementary table 1: Position of SVs and their heteroplasmy percentage in *Ifnar<sup>-/-</sup>* mice.

| Type of SVs | Breakpoints | Size (nt)     | Gene           | HET%  |
|-------------|-------------|---------------|----------------|-------|
| Insertions  | 249-249     | 3             | <i>mt-Rnr1</i> | 37.76 |
|             | 293-293     | 1             | <i>mt-Rn1</i>  | 1.09  |
|             | 476-476     | 31            | <i>mt-Rn1</i>  | 33.33 |
|             | 871-871     | 1             | <i>mt-Rn1</i>  | 2.18  |
|             | 891-891     | 1             | <i>mt-Rn1</i>  | 2.13  |
|             | 894-894     | 1             | <i>mt-Rn1</i>  | 23.89 |
|             | 2688-2688   | 22            | <i>mt-Tl</i>   | 0.05  |
|             | 2698-2698   | 1             | <i>mt-Tl</i>   | 0.04  |
|             | 2756-2756   | 1             | <i>mt-Nd1</i>  | 8.06  |
|             | 2759-2759   | 4             | <i>mt-Nd1</i>  | 1.22  |
|             | 2926-2926   | 2             | <i>mt-Nd1</i>  | 6.86  |
|             | 2928-2928   | 1             | <i>mt-Nd1</i>  | 36.59 |
|             | 3619-3619   | 1             | <i>mt-Nd1</i>  | 5.62  |
|             | 3655-3655   | 1             | <i>mt-Nd1</i>  | 3.55  |
|             | 3721-3721   | 3             | <i>mt-Ti</i>   | 13.79 |
|             | 4857-4857   | 3             | <i>mt-Nd2</i>  | 1.65  |
|             | 4859-4859   | 1             | <i>mt-Nd2</i>  | 2.73  |
|             | 5713-5713   | 1             | <i>mt-Cox1</i> | 23.08 |
|             | 6006-6006   | 1             | <i>mt-Cox1</i> | 27.27 |
|             | 8557-8557   | 1             | <i>mt-Atp6</i> | 1.20  |
|             | 8684-8684   | 2             | <i>mt-Atp6</i> | 1.73  |
|             | 8801-8801   | 1             | <i>mt-Atp6</i> | 5.76  |
|             | 8861-8861   | 1             | <i>mt-Atp6</i> | 3.70  |
|             | 8938-8938   | 1             | <i>mt-Atp6</i> | 2.65  |
|             | 8939-8939   | 1             | <i>mt-Atp6</i> | 2.78  |
|             | 9034-9034   | 1             | <i>mt-Atp6</i> | 16.28 |
|             | 9158-9158   | 2             | <i>mt-Atp6</i> | 30.00 |
|             | 9204-9204   | 21            | <i>mt-Atp6</i> | 2.00  |
|             | 12376-12376 | 1             | <i>mt-Nd5</i>  | 2.89  |
|             | 13436-13436 | 1             | <i>mt-Nd5</i>  | 1.90  |
|             | 13698-13698 | 1             | <i>mt-Nd6</i>  | 1.40  |
|             | 13702-13702 | 1             | <i>mt-Nd6</i>  | 1.48  |
|             | 13770-13770 | 26            | <i>mt-Nd6</i>  | 4.35  |
| 13808-13808 | 5           | <i>mt-Nd6</i> | 8.00           |       |
| 13820-13820 | 1           | <i>mt-Nd6</i> | 13.64          |       |
| 16181-16181 | 1           | <i>D-loop</i> | 17.86          |       |

|                  |             |               |                          |       |
|------------------|-------------|---------------|--------------------------|-------|
|                  | 16288-16288 | 8             | <i>D-loop</i>            | 14.29 |
|                  | 16290-16290 | 3             | <i>D-loop</i>            | 40.00 |
| <b>Deletions</b> | 259-260     | 1             | <i>mt-Rnr1</i>           | 1.18  |
|                  | 341-342     | 1             | <i>mt-Rnr1</i>           | 0.40  |
|                  | 372-373     | 1             | <i>mt-Rnr1</i>           | 1.09  |
|                  | 631-632     | 1             | <i>mt-Rnr1</i>           | 0.10  |
|                  | 645-646     | 1             | <i>mt-Rnr1</i>           | 0.08  |
|                  | 704-705     | 1             | <i>mt-Rnr1</i>           | 0.17  |
|                  | 746-747     | 1             | <i>mt-Rnr1</i>           | 0.14  |
|                  | 799-804     | 5             | <i>mt-Rnr1</i>           | 0.25  |
|                  | 2500-2502   | 2             | <i>mt-Rnr2</i>           | 0.16  |
|                  | 2518-2519   | 1             | <i>mt-Rnr2</i>           | 0.17  |
|                  | 2665-2666   | 1             | <i>mt-Rnr2</i>           | 0.08  |
|                  | 2683-2684   | 1             | <i>mt-Tl</i>             | 0.06  |
|                  | 2698-2699   | 1             | <i>mt-Tl</i>             | 0.04  |
|                  | 2728-2729   | 1             | <i>mt-Tl</i>             | 0.05  |
|                  | 2808-2809   | 1             | <i>mt-Nd1</i>            | 0.08  |
|                  | 2831-2832   | 1             | <i>mt-Nd1</i>            | 0.10  |
|                  | 2927-2928   | 1             | <i>mt-Nd1</i>            | 2.20  |
|                  | 3468-3469   | 1             | <i>mt-Nd1</i>            | 1.06  |
|                  | 3579-3580   | 1             | <i>mt-Nd1</i>            | 0.16  |
|                  | 3599-3600   | 1             | <i>mt-Nd1</i>            | 0.13  |
|                  | 3812-3813   | 1             | <i>mt-Tq</i>             | 22.22 |
|                  | 4525-4602   | 77            | <i>mt-Nd2</i>            | 0.62  |
|                  | 4851-4914   | 63            | <i>mt-Nd2</i>            | 3.09  |
|                  | 4876-4934   | 58            | <i>mt-Nd2</i>            | 2.00  |
|                  | 4903-4904   | 1             | <i>mt-Nd2</i>            | 3.45  |
|                  | 8254-8661   | 407           | <i>mt-Atp6...mt-Cox3</i> | 1.72  |
|                  | 8555-8674   | 119           | <i>mt-Atp6...mt-Cox3</i> | 1.04  |
|                  | 8685-8686   | 1             | <i>mt-Cox3</i>           | 0.61  |
|                  | 11380-11381 | 1             | <i>mt-Nd4</i>            | 4.51  |
|                  | 12501-12503 | 2             | <i>mt-Nd5</i>            | 0.30  |
|                  | 12624-12816 | 192           | <i>mt-Nd5</i>            | 3.75  |
|                  | 12631-12823 | 192           | <i>mt-Nd5</i>            | 1.63  |
|                  | 12957-12958 | 1             | <i>mt-Nd5</i>            | 10.81 |
|                  | 13427-13657 | 230           | <i>mt-Nd5</i>            | 1.84  |
|                  | 13430-13681 | 251           | <i>mt-Nd5... mt-Nd6</i>  | 1.88  |
|                  | 13675-13732 | 57            | <i>mt-Nd6</i>            | 0.34  |
| 13677-13774      | 97          | <i>mt-Nd6</i> | 0.37                     |       |

|                   |                            |           |                          |                |       |
|-------------------|----------------------------|-----------|--------------------------|----------------|-------|
|                   | 13700-13706                | 6         | <i>mt-Nd6</i>            | 0.52           |       |
|                   | 13701-13702                | 1         | <i>mt-Nd6</i>            | 1.89           |       |
|                   | 13773-13774                | 1         | <i>mt-Nd6</i>            | 1.83           |       |
|                   | 15152-15153                | 1         | <i>mt-Cytb</i>           | 20.00          |       |
| <b>Inversions</b> | 158-255                    | 97        | <i>mt-Rnr1</i>           | 1.92           |       |
|                   | 294-711                    | 417       | <i>mt-Rnr1</i>           | 1.51           |       |
|                   | 296-541                    | 245       | <i>mt-Rnr1</i>           | 1.15           |       |
|                   | 308-467                    | 159       | <i>mt-Rnr1</i>           | 6.86           |       |
|                   | 348-528                    | 180       | <i>mt-Rnr1</i>           | 0.97           |       |
|                   | 377-460                    | 83        | <i>mt-Rnr1</i>           | 0.61           |       |
|                   | 567-2199                   | 1632      | <i>mt-Rnr1</i>           | 1.63           |       |
|                   | 667-732                    | 65        | <i>mt-Rnr1</i>           | 0.18           |       |
|                   | 672-845                    | 173       | <i>mt-Rnr1</i>           | 2.40           |       |
|                   | 889-969                    | 80        | <i>mt-Rnr1</i>           | 3.12           |       |
|                   | 2550-2639                  | 89        | <i>mt-Rnr2</i>           | 0.23           |       |
|                   | 2681-2757                  | 76        | <i>mt-T11 ... mt-Nd1</i> | 0.07           |       |
|                   | 2747-2840                  | 93        | <i>mt-T11 ... mt-Nd1</i> | 0.20           |       |
|                   | 2759-2921                  | 162       | <i>mt-Nd1</i>            | 12.15          |       |
|                   | 3530-3620                  | 90        | <i>mt-Nd1</i>            | 0.37           |       |
|                   | 4900-5077                  | 177       | <i>mt-Nd2 ... mt-Ta</i>  | 14.28          |       |
|                   | 5716-6003                  | 287       | <i>mt-Co1</i>            | 38.46          |       |
|                   | 8785-8868                  | 83        | <i>mt-Co3</i>            | 10.57          |       |
|                   | 8866-8934                  | 68        | <i>mt-Co3</i>            | 1.28           |       |
|                   | 8931-9030                  | 99        | <i>mt-Co3</i>            | 2.63           |       |
|                   | 8932-9029                  | 97        | <i>mt-Co3</i>            | 3.85           |       |
|                   | 9027-9159                  | 132       | <i>mt-Co3</i>            | 8.33           |       |
|                   | 12763-12954                | 191       | <i>mt-Nd5</i>            | 100.00         |       |
|                   | 13718-13805                | 87        | <i>mt-Nd5</i>            | 0.88           |       |
|                   | <b>Tandem duplications</b> | 249-881   | 632                      | <i>mt-Rnr1</i> | 2.22  |
|                   |                            | 253-885   | 632                      | <i>mt-Rnr1</i> | 67.67 |
|                   |                            | 373-464   | 91                       | <i>mt-Rnr1</i> | 0.28  |
|                   |                            | 598-668   | 70                       | <i>mt-Rnr1</i> | 0.06  |
|                   |                            | 607-685   | 78                       | <i>mt-Rnr1</i> | 0.11  |
|                   |                            | 2581-2646 | 65                       | <i>mt-Rnr2</i> | 0.14  |
|                   |                            | 2655-2737 | 82                       | <i>mt-Rnr2</i> | 0.08  |
|                   |                            | 2726-2787 | 61                       | <i>mt-Rnr2</i> | 0.05  |
| 2766-2805         |                            | 39        | <i>mt-Nd1</i>            | 0.21           |       |
| 2806-2858         |                            | 52        | <i>mt-Nd1</i>            | 0.09           |       |
| 2858-2936         |                            | 78        | <i>mt-Nd1</i>            | 0.14           |       |

|             |     |                |       |
|-------------|-----|----------------|-------|
| 3652-3710   | 58  | <i>mt-Nd1</i>  | 0.43  |
| 4401-4481   | 80  | <i>mt-Nd2</i>  | 2.67  |
| 4598-4640   | 42  | <i>mt-Nd2</i>  | 0.61  |
| 8406-8487   | 81  | <i>mt-Atp6</i> | 0.61  |
| 8419-8500   | 81  | <i>mt-Atp6</i> | 0.58  |
| 8973-9039   | 66  | <i>mt-Co3</i>  | 0.98  |
| 12378-12849 | 471 | <i>mt-Nd5</i>  | 25.33 |
| 13591-13689 | 98  | <i>mt-Nd6</i>  | 0.36  |
| 13608-13689 | 81  | <i>mt-Nd6</i>  | 0.36  |
| 13666-13723 | 57  | <i>mt-Nd6</i>  | 1.03  |
| 13668-13725 | 57  | <i>mt-Nd6</i>  | 0.34  |
| 13673-13730 | 57  | <i>mt-Nd6</i>  | 0.37  |
| 13702-13817 | 115 | <i>mt-Nd6</i>  | 4.00  |

Supplementary table 2: Position of SNVs, their consequences, and heteroplasmy percentage in *Ifnar<sup>-/-</sup>* mice.

| Substitution | Consequence      | Gene          | HET%  |
|--------------|------------------|---------------|-------|
| m.112A>G     | non-coding       | <i>mt-Tf</i>  | 12.8  |
| m.115C>T     | non-coding       | <i>mt-Tf</i>  | 87.63 |
| m.363T>G     | non-coding       | <i>mt-Tf</i>  | 34.72 |
| m.481A>C     | non-coding       | <i>mt-Tf</i>  | 49.71 |
| m.551T>G     | non-coding       | <i>mt-Tf</i>  | 28.97 |
| m.628C>G     | non-coding       | <i>mt-Tf</i>  | 34.45 |
| m.756G>C     | non-coding       | <i>mt-Tf</i>  | 54.05 |
| m.898C>T     | non-coding       | <i>mt-Tf</i>  | 10.8  |
| m.899G>A     | non-coding       | <i>mt-Tf</i>  | 44.65 |
| m.1419A>T    | non-coding       | <i>mt-Tv</i>  | 75.3  |
| m.1537G>C    | non-coding       | <i>mt-Tv</i>  | 45.89 |
| m.1714A>G    | non-coding       | <i>mt-Tv</i>  | 71.87 |
| m.1723A>C    | non-coding       | <i>mt-Tv</i>  | 85.81 |
| m.1745A>T    | non-coding       | <i>mt-Tv</i>  | 55.32 |
| m.1751A>G    | non-coding       | <i>mt-Tv</i>  | 67.31 |
| m.1772C>T    | non-coding       | <i>mt-Tv</i>  | 20.27 |
| m.1883A>G    | non-coding       | <i>mt-Tv</i>  | 21.03 |
| m.1986C>G    | non-coding       | <i>mt-Tv</i>  | 51.24 |
| m.2012T>C    | non-coding       | <i>mt-Tv</i>  | 74.24 |
| m.2094C>T    | non-coding       | <i>mt-Tv</i>  | 26.8  |
| m.2260C>G    | Intergenic       | –             | 61.54 |
| m.2423A>C    | Intergenic       | –             | 75.17 |
| m.2437G>C    | Intergenic       | –             | 33.81 |
| m.2530C>G    | Intergenic       | –             | 18.22 |
| m.2573G>T    | Intergenic       | –             | 19.85 |
| m.2650G>A    | Intergenic       | –             | 47.88 |
| m.2687A>C    | Intergenic       | –             | 41.29 |
| m.2700T>C    | Intergenic       | –             | 42.6  |
| m.2885T>A    | missense variant | <i>mt-Nd1</i> | 44.36 |
| m.2898G>C    | missense variant | <i>mt-Nd1</i> | 17.34 |
| m.2950C>G    | missense variant | <i>mt-Nd1</i> | 35.12 |
| m.2951T>G    | missense variant | <i>mt-Nd1</i> | 35    |
| m.2973C>T    | missense variant | <i>mt-Nd1</i> | 56.16 |
| m.3116C>G    | missense variant | <i>mt-Nd1</i> | 61.51 |
| m.3321G>C    | missense variant | <i>mt-Nd1</i> | 50.93 |
| m.3341C>T    | missense variant | <i>mt-Nd1</i> | 14.74 |
| m.3343T>C    | missense variant | <i>mt-Nd1</i> | 16.39 |
| m.3354G>T    | missense variant | <i>mt-Nd1</i> | 47.11 |

|           |                  |                |       |
|-----------|------------------|----------------|-------|
| m.3378G>C | missense variant | <i>mt-Nd1</i>  | 52.48 |
| m.3431G>T | missense variant | <i>mt-Nd1</i>  | 56.6  |
| m.3705T>C | missense variant | <i>mt-Nd1</i>  | 22    |
| m.3764T>C | missense variant | <i>mt-Ti</i>   | 30.04 |
| m.4078A>T | missense variant | <i>mt-Nd2</i>  | 88.21 |
| m.4110C>G | missense variant | <i>mt-Nd2</i>  | 96.84 |
| m.4239C>G | missense variant | <i>mt-Nd2</i>  | 25.25 |
| m.4626C>G | missense variant | <i>mt-Nd2</i>  | 65.73 |
| m.5116A>G | missense variant | <i>mt-Tn</i>   | 74.18 |
| m.5145A>C | missense variant | <i>mt-Tn</i>   | 51.64 |
| m.5211T>C | missense variant | <i>mt-Tc</i>   | 79.04 |
| m.5232T>A | missense variant | <i>mt-Tc</i>   | 60.31 |
| m.5403G>C | missense variant | <i>mt-Cox1</i> | 77.63 |
| m.5460G>T | missense variant | <i>mt-Cox1</i> | 50.82 |
| m.5702A>G | missense variant | <i>mt-Cox1</i> | 36.8  |
| m.5862T>G | missense variant | <i>mt-Cox1</i> | 62.26 |
| m.5935C>A | missense variant | <i>mt-Cox1</i> | 24.59 |
| m.6133G>A | missense variant | <i>mt-Cox1</i> | 40.54 |
| m.6272T>G | missense variant | <i>mt-Cox1</i> | 75.02 |
| m.6612C>G | missense variant | <i>mt-Cox1</i> | 50.79 |
| m.6625T>G | missense variant | <i>mt-Cox1</i> | 96.74 |
| m.6884A>T | missense variant | <i>mt-Ts1</i>  | 40.87 |
| m.7045C>G | missense variant | <i>mt-Cox2</i> | 18.34 |
| m.7129C>G | missense variant | <i>mt-Cox2</i> | 24.45 |
| m.7130T>G | missense variant | <i>mt-Cox2</i> | 49.59 |
| m.7188A>C | missense variant | <i>mt-Cox2</i> | 87.59 |
| m.7415C>G | missense variant | <i>mt-Cox2</i> | 37.64 |
| m.7435A>C | missense variant | <i>mt-Cox2</i> | 37.91 |
| m.7477A>T | missense variant | <i>mt-Cox2</i> | 41.38 |
| m.7598T>C | missense variant | <i>mt-Cox2</i> | 66.87 |
| m.8000T>G | missense variant | <i>mt-Atp6</i> | 32.29 |
| m.8106C>A | missense variant | <i>mt-Atp6</i> | 53.21 |
| m.8124A>C | missense variant | <i>mt-Atp6</i> | 47.13 |
| m.8127A>G | missense variant | <i>mt-Atp6</i> | 35.05 |
| m.8130A>C | missense variant | <i>mt-Atp6</i> | 87.59 |
| m.8168C>T | missense variant | <i>mt-Atp6</i> | 43.2  |
| m.8200T>C | missense variant | <i>mt-Atp6</i> | 63.19 |
| m.8201T>A | missense variant | <i>mt-Atp6</i> | 75.44 |
| m.8254G>T | missense variant | <i>mt-Atp6</i> | 57.49 |
| m.8457T>G | missense variant | <i>mt-Atp6</i> | 61.76 |
| m.8742G>C | missense variant | <i>mt-Co3</i>  | 76.03 |

|            |                  |                |       |
|------------|------------------|----------------|-------|
| m.8766A>G  | missense variant | <i>mt-Co3</i>  | 50.79 |
| m.8810A>G  | missense variant | <i>mt-Co3</i>  | 38.64 |
| m.8890C>A  | missense variant | <i>mt-Co3</i>  | 33.63 |
| m.8958C>G  | missense variant | <i>mt-Co3</i>  | 17.65 |
| m.8966A>C  | missense variant | <i>mt-Co3</i>  | 25.98 |
| m.9024T>C  | missense variant | <i>mt-Co3</i>  | 46.76 |
| m.9042T>A  | missense variant | <i>mt-Co3</i>  | 28.57 |
| m.9137A>C  | missense variant | <i>mt-Co3</i>  | 49.57 |
| m.9190C>G  | missense variant | <i>mt-Co3</i>  | 78.57 |
| m.9556C>G  | missense variant | <i>mt-Nd3</i>  | 24.47 |
| m.9683A>G  | missense variant | <i>mt-Nd3</i>  | 49.44 |
| m.9835T>C  | missense variant | <i>mt-Tr</i>   | 35.58 |
| m.9886T>C  | missense variant | <i>mt-Nd4l</i> | 34.66 |
| m.10288G>T | missense variant | <i>mt-Nd4</i>  | 77.09 |
| m.10825A>C | missense variant | <i>mt-Nd4</i>  | 94.42 |
| m.11110T>A | missense variant | <i>mt-Nd4</i>  | 78.59 |
| m.11273T>G | missense variant | <i>mt-Nd4</i>  | 55.82 |
| m.11373A>C | missense variant | <i>mt-Nd4</i>  | 23.21 |
| m.11376T>G | missense variant | <i>mt-Nd4</i>  | 15.84 |
| m.11408C>A | missense variant | <i>mt-Nd4</i>  | 47.03 |
| m.11440A>G | missense variant | <i>mt-Nd4</i>  | 22.85 |
| m.11445T>A | missense variant | <i>mt-Nd4</i>  | 44.09 |
| m.11448C>T | missense variant | <i>mt-Nd4</i>  | 68.6  |
| m.11539G>A | missense variant | <i>mt-Nd4</i>  | 14.29 |
| m.11541G>A | missense variant | <i>mt-Nd4</i>  | 63.68 |
| m.11586A>C | missense variant | <i>mt-Th</i>   | 19.71 |
| m.12007C>A | missense variant | <i>mt-Nd5</i>  | 43.85 |
| m.12054T>G | missense variant | <i>mt-Nd5</i>  | 24.22 |
| m.12058T>C | missense variant | <i>mt-Nd5</i>  | 10    |
| m.12176G>C | missense variant | <i>mt-Nd5</i>  | 93.45 |
| m.12264A>G | missense variant | <i>mt-Nd5</i>  | 55.22 |
| m.12323A>T | missense variant | <i>mt-Nd5</i>  | 39.43 |
| m.12348A>G | missense variant | <i>mt-Nd5</i>  | 77.89 |
| m.12426C>G | missense variant | <i>mt-Nd5</i>  | 35.42 |
| m.12574T>G | missense variant | <i>mt-Nd5</i>  | 36    |
| m.12685T>C | missense variant | <i>mt-Nd5</i>  | 63.96 |
| m.12735T>G | missense variant | <i>mt-Nd5</i>  | 52.28 |
| m.12872C>G | missense variant | <i>mt-Nd5</i>  | 59.22 |
| m.13341A>T | missense variant | <i>mt-Nd5</i>  | 76.16 |
| m.13550T>A | missense variant | <i>mt-Nd5</i>  | 46.6  |
| m.13828T>G | missense variant | <i>mt-Nd6</i>  | 91.61 |

|            |                  |                |       |
|------------|------------------|----------------|-------|
| m.13993T>C | missense variant | <i>mt-Nd6</i>  | 81.07 |
| m.14151C>T | missense variant | <i>mt-Cytb</i> | 21.85 |
| m.14353A>T | missense variant | <i>mt-Cytb</i> | 31.39 |
| m.14379T>G | missense variant | <i>mt-Cytb</i> | 93.72 |
| m.14464T>A | missense variant | <i>mt-Cytb</i> | 47.22 |
| m.14768A>C | missense variant | <i>mt-Cytb</i> | 32.17 |
| m.14823A>T | missense variant | <i>mt-Cytb</i> | 36.81 |
| m.14922C>A | missense variant | <i>mt-Cytb</i> | 44.74 |
| m.14955T>G | missense variant | <i>mt-Cytb</i> | 94.42 |
| m.14990C>G | missense variant | <i>mt-Cytb</i> | 45.3  |
| m.15309G>C | missense variant | <i>mt-Tt</i>   | 14.02 |
| m.15377C>A | missense variant | <i>mt-Tp</i>   | 49.18 |
| m.15383C>A | missense variant | <i>mt-Tp</i>   | 42.54 |
| m.15441C>G | non coding       | D-loop         | 37.67 |
| m.15602C>G | non coding       | D-loop         | 75.12 |
| m.15613G>C | non coding       | D-loop         | 59.89 |
| m.15615C>T | non coding       | D-loop         | 11.52 |
| m.15618A>G | non coding       | D-loop         | 16.6  |
| m.15622C>A | non coding       | D-loop         | 17.99 |
| m.15833C>G | non coding       | D-loop         | 28.77 |
| m.15950A>C | non coding       | D-loop         | 73.36 |
| m.15975T>C | non coding       | D-loop         | 46.53 |
| m.16007G>A | non coding       | D-loop         | 34.2  |

---



Supplementary table 3: 6 *Ifnar*<sup>-/-</sup> cells are representing some common variations.

| Single DA neuron's name        | No. Shared variations | SNP                     |
|--------------------------------|-----------------------|-------------------------|
| Ifnar-12 & Ifnar-13 & Ifnar-21 | 1                     | m.12054T>G              |
| Ifnar-12 & Ifnar-13 & Ifnar-23 | 1                     | m.2650G>A               |
| Ifnar-11 & Ifnar-12            | 2                     | m.13828T>G<br>m.8254G>T |
| Ifnar-11 & Ifnar-21            | 1                     | m.8127A>G               |
| Ifnar-12 & Ifnar-13            | 1                     | m.899G>A                |
| Ifnar-13 & Ifnar-23            | 2                     | m.15602C>G<br>m.898C>T  |
| Ifnar-21 & Ifnar-33            | 2                     | m.2423A>C<br>m.5145A>C  |

Supplementary table 4: Position of SVs and their heteroplasmy percentage in bulk MCF7 cell line.

| Type of SVs       | Breakpoints | Size (nt) | Gene           | HET%  |
|-------------------|-------------|-----------|----------------|-------|
| <b>Deletions</b>  | 2509-2515   | 5         | <i>MT-RNR2</i> | 1.4   |
|                   | 10687-10688 | 1         | <i>MT-ND4L</i> | 1.32  |
|                   | 6746-6771   | 24        | <i>MT-CO1</i>  | 2.1   |
|                   | 7477-7483   | 5         | <i>MT-CO2</i>  | 1.3   |
| <b>Inversions</b> | 1108-1199   | 94        | <i>MT-ND4</i>  | 1.9   |
|                   | 7019-7116   | 98        | <i>MT-CO1</i>  | 1     |
| <b>Insertions</b> | 5742-5742   | 1         | intergenic     | 2.47  |
|                   | 5897-5898   | 1         | <i>MT-TY</i>   | 1.2   |
|                   | 5894-5894   | 1         | intergenic     | 11.11 |

Supplementary table 5: Position of SVs and their heteroplasmy percentage in single MCF7 cells.

| Type of SVs                | Breakpoints | Size (nt) | Gene           | HET%  |
|----------------------------|-------------|-----------|----------------|-------|
| <b>Deletions</b>           | 9439-9440   | 1         | <i>MT-CO3</i>  | 8     |
|                            | 11692-11693 | 1         | <i>MT-ND4</i>  | 23.81 |
|                            | 16230-16231 | 1         | D-loop         | 7.65  |
| <b>Inversions</b>          | 7994-8167   | 174       | <i>MT-CO2</i>  | 16.39 |
|                            | 7996-8156   | 161       | <i>MT-CO2</i>  | 3     |
|                            | 7783-7783   | 2         | <i>MT-CO2</i>  | 10.71 |
|                            | 7790-7790   | 6         | <i>MT-CO2</i>  | 4.44  |
|                            | 7799-7799   | 1         | <i>MT-CO2</i>  | 21.43 |
|                            | 7995-7995   | 1         | <i>MT-CO2</i>  | 2.79  |
|                            | 7996-7996   | 4         | <i>MT-CO2</i>  | 2.62  |
|                            | 8067-8067   | 13        | <i>MT-CO2</i>  | 3.16  |
|                            | 8118-8118   | 3         | <i>MT-CO2</i>  | 3.45  |
|                            | 8172-8172   | 1         | <i>MT-CO2</i>  | 6.67  |
|                            | 9161-9161   | 3         | <i>MT-ATP6</i> | 7.69  |
|                            | 9311-9311   | 1         | <i>MT-CO3</i>  | 7.69  |
|                            | 11705-11705 | 2         | <i>MT-ND4</i>  | 5     |
|                            | 12662-12662 | 1         | <i>MT-ND5</i>  | 4.65  |
|                            | 14438-14438 | 1         | <i>MT-ND6</i>  | 8.33  |
|                            | 16135-16135 | 1         | <i>MT-ND6</i>  | 17.46 |
|                            | 16142-16142 | 4         | D-loop         | 59.64 |
|                            | 16221-16221 | 1         | D-loop         | 76.75 |
|                            | 16217-16217 | 2         | D-loop         | 2.56  |
| <b>Tandem duplications</b> | 7819-7984   | 166       | <i>MT-CO2</i>  | 9.09  |

Supplementary table 6: Position of SNVs, their consequences, and heteroplasmy percentage in bulk MCF7 cell line.

| Substitution         | Consequence      | Impact   | Gene          | Amino acid substitution | Codons  | HET%  | Existing variants           | Phenotype data    |
|----------------------|------------------|----------|---------------|-------------------------|---------|-------|-----------------------------|-------------------|
| <b>m.3977T&gt;G</b>  | missense variant | MODERATE | <i>MT-ND1</i> | p.F224C                 | tTc/tGc | 11.43 |                             |                   |
| <b>m.5390A&gt;C</b>  | missense variant | MODERATE | <i>MT-ND2</i> | p.M307I                 | atA/atC | 12.84 |                             |                   |
| <b>m.9387G&gt;C</b>  | missense variant | MODERATE | <i>MT-CO3</i> | p.V61L                  | Gta/Cta | 16.47 |                             |                   |
| <b>m.9447T&gt;G</b>  | missense variant | MODERATE | <i>MT-CO3</i> | p.Y81D                  | Tac/Gac | 11.54 |                             |                   |
| <b>m.12771G&gt;T</b> | missense variant | MODERATE | <i>MT-ND5</i> | p.E145D                 | gaG/gaT | 12.12 | COSM1155528                 | Endometrium tumor |
| <b>m.14294T&gt;G</b> | missense variant | MODERATE | <i>MT-ND6</i> | p.Y127S                 | tAt/tCt | 10.89 | COSM1138256&<br>COSM1138257 | Kidney tumor      |
| <b>m.14417A&gt;G</b> | missense variant | MODERATE | <i>MT-ND6</i> | p.V86A                  | gTt/gCt | 10.99 | rs878905427                 |                   |
| <b>m.15097T&gt;G</b> | missense variant | MODERATE | <i>MT-CYB</i> | p.I117M                 | atT/atG | 17.36 |                             |                   |
| <b>m.12596T&gt;G</b> | Stop-gained      | HIGH     | <i>MT-ND5</i> | p.M87X                  | aTa/aGa | 16.67 |                             |                   |
| <b>m.14283C&gt;T</b> | Stop-gained      | HIGH     | <i>MT-ND6</i> | p.G131X                 | Ggg/Agg | 12.61 |                             |                   |

COSMIC: The Catalogue Of Somatic Mutations In Cancer

Condel: Consensus deleterious score for an amino acid substitution based on SIFT and PolyPhen2

X: stop codon

Supplementary table 7: Position of SNVs, their consequences, and heteroplasmy percentage in single MCF7 cells.

| Substitution        | Consequence      | Gene           | Impact   | Amino acid change | HET%  | Codons  | Existing variants           | Phenotype data |
|---------------------|------------------|----------------|----------|-------------------|-------|---------|-----------------------------|----------------|
| <b>m.3422T&gt;A</b> | Missense variant | <i>MT-ND1</i>  | MODERATE | p.V39D            | 18.18 | gTt/gAt |                             |                |
| <b>m.3764C&gt;T</b> | Missense variant | <i>MT-ND1</i>  | MODERATE | p.T153M           | 15.15 | aCa/aTa |                             |                |
| <b>m.3797C&gt;G</b> | Missense variant | <i>MT-ND1</i>  | MODERATE | p.T164S           | 18.92 | aCc/aGc |                             |                |
| <b>m.3929T&gt;C</b> | Missense variant | <i>MT-ND1</i>  | MODERATE | p.V208A           | 11.11 | gTc/gCc |                             |                |
| <b>m.4070A&gt;C</b> | Missense variant | <i>MT-ND1</i>  | MODERATE | p.Y255S           | 15.52 | tAc/tCc |                             |                |
| <b>m.4073C&gt;A</b> | Missense variant | <i>MT-ND1</i>  | MODERATE | p.T256K           | 40.62 | aCa/aAa |                             |                |
| <b>m.4075A&gt;G</b> | Missense variant | <i>MT-ND1</i>  | MODERATE | p.T257A           | 20.51 | Aca/Gca |                             |                |
| <b>m.4133C&gt;A</b> | Missense variant | <i>MT-ND1</i>  | MODERATE | p.A276E           | 31.43 | gCa/gAa |                             |                |
| <b>m.4206A&gt;C</b> | Missense variant | <i>MT-ND1</i>  | MODERATE | p.L300F           | 51.92 | ttA/ttC |                             |                |
| <b>m.4226T&gt;C</b> | Missense variant | <i>MT-ND1</i>  | MODERATE | p.M307T           | 35.9  | aTa/aCa |                             |                |
| <b>m.4246A&gt;C</b> | Missense variant | <i>MT-ND1</i>  | MODERATE | p.I314L           | 13.33 | Att/Ctt |                             |                |
| <b>m.4494A&gt;T</b> | Missense variant | <i>MT-ND2</i>  | MODERATE | p.I9F             | 14.49 | Atc/Ttc |                             |                |
| <b>m.4572A&gt;G</b> | Missense variant | <i>MT-ND2</i>  | MODERATE | p.M35V            | 19.57 | Ata/Gta |                             |                |
| <b>m.4592T&gt;G</b> | Missense variant | <i>MT-ND2</i>  | MODERATE | p.I41M            | 26.92 | atT/atG |                             |                |
| <b>m.4692C&gt;G</b> | Missense variant | <i>MT-ND2</i>  | MODERATE | p.L75V            | 24.07 | Ctc/Gtc |                             |                |
| <b>m.4708T&gt;C</b> | Missense variant | <i>MT-ND2</i>  | MODERATE | p.L80P            | 11.9  | cTc/cCc |                             |                |
| <b>m.4831G&gt;A</b> | Missense variant | <i>MT-ND2</i>  | MODERATE | p.G121D           | 66.67 | gGc/gAc |                             |                |
| <b>m.4869C&gt;T</b> | Stop-gained      | <i>MT-ND2</i>  | HIGH     | p.Q134X           | 22.22 | Caa/Taa |                             |                |
| <b>m.4888C&gt;A</b> | Stop-gained      | <i>MT-ND2</i>  | HIGH     | p.S140X           | 10.81 | tCa/tAa |                             |                |
| <b>m.5230T&gt;G</b> | Missense variant | <i>MT-ND2</i>  | MODERATE | p.L254R           | 34.38 | cTg/cGg |                             |                |
| <b>m.6009C&gt;G</b> | Missense variant | <i>MT-CO1</i>  | MODERATE | p.L36V            | 50    | Ctt/Gtt |                             |                |
| <b>m.6203A&gt;C</b> | Missense variant | <i>MT-CO1</i>  | MODERATE | p.M100I           | 12.12 | atA/atC |                             |                |
| <b>m.6403C&gt;A</b> | Missense variant | <i>MT-CO1</i>  | MODERATE | p.T167K           | 10.81 | aCa/aAa |                             |                |
| <b>m.6438T&gt;G</b> | Missense variant | <i>MT-CO1</i>  | MODERATE | p.Y179D           | 41.33 | Tac/Gac |                             |                |
| <b>m.6698A&gt;T</b> | Missense variant | <i>MT-CO1</i>  | MODERATE | p.K265N           | 17.95 | aaA/aaT |                             |                |
| <b>m.6782T&gt;G</b> | Missense variant | <i>MT-CO1</i>  | MODERATE | p.F293L           | 10.2  | ttT/ttG |                             |                |
| <b>m.6795G&gt;T</b> | Missense variant | <i>MT-CO1</i>  | MODERATE | p.D298Y           | 54.84 | Gac/Tac |                             |                |
| <b>m.6967G&gt;A</b> | Missense variant | <i>MT-CO1</i>  | MODERATE | p.G355D           | 12.82 | gGc/gAc |                             |                |
| <b>m.6976T&gt;G</b> | Missense variant | <i>MT-CO1</i>  | MODERATE | p.L358W           | 12.9  | tTa/tGa | COSM1331631&<br>COSM1331632 | Ovary tumour   |
| <b>m.7051T&gt;G</b> | Stop-gained      | <i>MT-CO1</i>  | HIGH     | p.M383X           | 33.33 | aTa/aGa |                             |                |
| <b>m.7291C&gt;G</b> | Stop-gained      | <i>MT-CO1</i>  | HIGH     | p.T463X           | 11.43 | aCa/aGa |                             |                |
| <b>m.7756C&gt;A</b> | Missense variant | <i>MT-CO2</i>  | MODERATE | p.D57E            | 22.22 | gaC/gaA |                             |                |
| <b>m.7950T&gt;G</b> | Stop-gained      | <i>MT-CO2</i>  | HIGH     | p.M122X           | 13.56 | aTa/aGa |                             |                |
| <b>m.7968T&gt;G</b> | Missense variant | <i>MT-CO2</i>  | MODERATE | p.L128R           | 12.5  | cTa/cGa |                             |                |
| <b>m.8178A&gt;T</b> | Missense variant | <i>MT-CO2</i>  | MODERATE | p.E198V           | 10.81 | gAa/gTa |                             |                |
| <b>m.8567T&gt;C</b> | Missense variant | <i>MT-ATP8</i> | MODERATE | p.S68P            | 21.88 | Tcc/Ccc |                             |                |
| <b>m.9070T&gt;A</b> | Missense variant | <i>MT-ATP6</i> | MODERATE | p.S182T           | 21.67 | Tca/Aca |                             |                |

|                      |                    |                |          |         |       |         |                             |                   |
|----------------------|--------------------|----------------|----------|---------|-------|---------|-----------------------------|-------------------|
| <b>m.9194A&gt;G</b>  | Missense variant   | <i>MT-ATP6</i> | MODERATE | p.H223R | 13.16 | cAc/cGc |                             |                   |
| <b>m.9235T&gt;C</b>  | Missense variant   | <i>MT-CO3</i>  | MODERATE | p.M10T  | 45.45 | aTa/aCa |                             |                   |
| <b>m.9303A&gt;G</b>  | Missense variant   | <i>MT-CO3</i>  | MODERATE | p.M33V  | 10.42 | Atg/Gtg |                             |                   |
| <b>m.9396G&gt;T</b>  | Stop-gained        | <i>MT-CO3</i>  | HIGH     | p.E64X  | 15.91 | Gaa/Taa |                             |                   |
| <b>m.9399A&gt;C</b>  | Missense variant t | <i>MT-CO3</i>  | MODERATE | p.S65R  | 52.17 | Agc/Cgc |                             |                   |
| <b>m.9562C&gt;G</b>  | Stop-gained        | <i>MT-CO3</i>  | HIGH     | p.T119X | 11.11 | aCa/aGa |                             |                   |
| <b>m.9717C&gt;A</b>  | Missense variant   | <i>MT-CO3</i>  | MODERATE | p.L171I | 32.56 | Ctc/Atc |                             |                   |
| <b>m.9885T&gt;A</b>  | Missense variant   | <i>MT-CO3</i>  | MODERATE | p.F227I | 11.11 | Ttt/Att |                             |                   |
| <b>m.9960C&gt;G</b>  | Missense variant   | <i>MT-CO3</i>  | MODERATE | p.L252V | 10.59 | Ctg/Gtg |                             |                   |
| <b>m.10192C&gt;T</b> | Missense variant   | <i>MT-ND3</i>  | MODERATE | p.S45F  | 11.76 | tCc/tTc |                             |                   |
| <b>m.10820C&gt;T</b> | Missense variant   | <i>MT-ND4</i>  | MODERATE | p.H21Y  | 36.59 | Cac/Tac |                             |                   |
| <b>m.10923C&gt;T</b> | Missense variant   | <i>MT-ND4</i>  | MODERATE | p.T55I  | 12.12 | aCc/aTc |                             |                   |
| <b>m.11217C&gt;A</b> | Missense variant   | <i>MT-ND4</i>  | MODERATE | p.T153N | 15    | aCc/aAc |                             |                   |
| <b>m.11286T&gt;C</b> | Missense variant   | <i>MT-ND4</i>  | MODERATE | p.I176T | 55.1  | aTt/aCt |                             |                   |
| <b>m.11546G&gt;A</b> | Missense variant   | <i>MT-ND4</i>  | MODERATE | p.V263M | 44.64 | Gta/Ata |                             |                   |
| <b>m.11598C&gt;G</b> | Stop-gained        | <i>MT-ND4</i>  | HIGH     | p.T280X | 64.29 | aCa/aGa |                             |                   |
| <b>m.11700T&gt;A</b> | Missense variant   | <i>MT-ND4</i>  | MODERATE | p.I314N | 20.37 | aTt/aAt |                             |                   |
| <b>m.11787T&gt;A</b> | Missense variant   | <i>MT-ND4</i>  | MODERATE | p.I343N | 19.15 | aTc/aAc |                             |                   |
| <b>m.11792T&gt;C</b> | Missense variant   | <i>MT-ND4</i>  | MODERATE | p.S345P | 11.29 | Tct/Cct |                             |                   |
| <b>m.11795C&gt;G</b> | Missense variant   | <i>MT-ND4</i>  | MODERATE | p.Q346E | 11.32 | Caa/Gaa |                             |                   |
| <b>m.12027T&gt;A</b> | Missense variant   | <i>MT-ND4</i>  | MODERATE | p.I423N | 58.33 | aTt/aAt |                             |                   |
| <b>m.12452T&gt;A</b> | Missense variant   | <i>MT-ND5</i>  | MODERATE | p.I39N  | 32.35 | aTt/aAt |                             |                   |
| <b>m.12517G&gt;T</b> | Missense variant   | <i>MT-ND5</i>  | MODERATE | p.V61F  | 44.23 | Gtt/Ttt |                             |                   |
| <b>m.12653G&gt;C</b> | Missense variant   | <i>MT-ND5</i>  | MODERATE | p.W106S | 62.69 | tGa/tCa |                             |                   |
| <b>m.12659T&gt;G</b> | Stop-gained        | <i>MT-ND5</i>  | HIGH     | p.M108X | 12.77 | aTa/aGa |                             |                   |
| <b>m.12694T&gt;C</b> | Missense variant   | <i>MT-ND5</i>  | MODERATE | p.Y120H | 27.94 | Tat/Cat |                             |                   |
| <b>m.12764G&gt;C</b> | Missense variant   | <i>MT-ND5</i>  | MODERATE | p.G143A | 21.43 | gGc/gCc |                             |                   |
| <b>m.12925G&gt;A</b> | Missense variant   | <i>MT-ND5</i>  | MODERATE | p.D197N | 15    | Gac/Aac |                             |                   |
| <b>m.13026C&gt;G</b> | Missense variant   | <i>MT-ND5</i>  | MODERATE | p.H230Q | 69.33 | caC/caG |                             |                   |
| <b>m.13438C&gt;A</b> | Missense variant   | <i>MT-ND5</i>  | MODERATE | p.L368I | 45.71 | Ctc/Atc |                             |                   |
| <b>m.13462G&gt;C</b> | Missense variant   | <i>MT-ND5</i>  | MODERATE | p.G376R | 12.9  | Ggc/Cgc |                             |                   |
| <b>m.13813G&gt;A</b> | Missense variant   | <i>MT-ND5</i>  | MODERATE | p.V493I | 12.9  | Gtc/Atc |                             |                   |
| <b>m.14098T&gt;G</b> | Missense variant   | <i>MT-ND5</i>  | MODERATE | p.F588V | 22.22 | Ttc/Gtc |                             |                   |
| <b>m.14109C&gt;G</b> | Missense variant   | <i>MT-ND5</i>  | MODERATE | p.F591L | 23.19 | ttC/ttG |                             |                   |
| <b>m.14187C&gt;A</b> | Missense variant   | <i>MT-ND6</i>  | MODERATE | p.G163C | 19.44 | Ggt/Tgt |                             |                   |
| <b>m.14291T&gt;G</b> | Missense variant   | <i>MT-ND6</i>  | MODERATE | p.E128A | 41.77 | gAa/gCa | COSM1155551&<br>COSM1155552 | Endometrium tumor |
| <b>m.14656A&gt;C</b> | Missense variant   | <i>MT-ND6</i>  | MODERATE | p.F6L   | 15.62 | ttT/ttG |                             |                   |
| <b>m.14658A&gt;C</b> | Missense variant   | <i>MT-ND6</i>  | MODERATE | p.F6V   | 27.82 | Ttt/Gtt |                             |                   |
| <b>m.14886C&gt;T</b> | Missense variant   | <i>MT-CYB</i>  | MODERATE | p.T47M  | 32.5  | aCa/aTa |                             |                   |
| <b>m.15011A&gt;G</b> | Missense variant   | <i>MT-CYB</i>  | MODERATE | p.M89V  | 26.83 | Ata/Gta |                             |                   |

|                      |                  |               |          |         |       |         |             |                                                 |
|----------------------|------------------|---------------|----------|---------|-------|---------|-------------|-------------------------------------------------|
| <b>m.15054A&gt;C</b> | Missense variant | <i>MT-CYB</i> | MODERATE | p.Y103S | 18.75 | tAt/tCt |             |                                                 |
| <b>m.15117T&gt;C</b> | Missense variant | <i>MT-CYB</i> | MODERATE | p.M124T | 40.32 | aTa/aCa |             |                                                 |
| <b>m.15213T&gt;A</b> | Missense variant | <i>MT-CYB</i> | MODERATE | p.I156N | 15    | aTt/aAt |             |                                                 |
| <b>m.15263C&gt;A</b> | Missense variant | <i>MT-CYB</i> | MODERATE | p.P173T | 10.64 | Ccc/Acc |             |                                                 |
| <b>m.15301G&gt;C</b> | Missense variant | <i>MT-CYB</i> | MODERATE | p.L185F | 20.29 | ttG/ttC | rs193302991 | <b>Familial cancer of breast (OMIM: 114480)</b> |
| <b>m.15483C&gt;G</b> | Missense variant | <i>MT-CYB</i> | MODERATE | p.S246W | 70.69 | tCa/tGa |             |                                                 |
| <b>m.15510A&gt;C</b> | Missense variant | <i>MT-CYB</i> | MODERATE | p.N255T | 10.81 | aAt/aCt |             |                                                 |
| <b>m.15818T&gt;C</b> | Missense variant | <i>MT-CYB</i> | MODERATE | p.Y358H | 11.32 | Tac/Cac |             |                                                 |

Supplementary table 8: Position of SVs and their heteroplasmy percentage in bulk SW620 cell line.

| Type of SVs       | Breakpoints | Size (nt) | Gene           | HET%  |
|-------------------|-------------|-----------|----------------|-------|
| <b>Deletions</b>  | 720-721     | 1         | <i>MT-RNR1</i> | 4.35  |
|                   | 6377-6378   | 1         | <i>MT-CO1</i>  | 3.03  |
|                   | 8805-8806   | 1         | <i>MT-ATP6</i> | 2.82  |
|                   | 10687-10688 | 2         | <i>MT-ND4L</i> | 3.51  |
|                   | 15628-15629 | 1         | <i>MT-CYB</i>  | 3.28  |
|                   | 16089-16090 | 1         | D-loop         | 3.92  |
| <b>Insertions</b> | 1385-1385   | 2         | <i>MT-RNR1</i> | 2.22  |
|                   | 3696-3696   | 1         | <i>MT-ND1</i>  | 4.35  |
|                   | 5302-5302   | 1         | <i>MT-ND2</i>  | 5.13  |
|                   | 16560-16560 | 21        | D-loop         | 13.04 |



Supplementary table 9: Position of SVs and their heteroplasmy percentage in single SW620 cells.

| Type of SVs                | Breakpoints | Size (nt) | Gene                     | HET%  |
|----------------------------|-------------|-----------|--------------------------|-------|
| <b>Deletions</b>           | 5304-5316   | 12        | <i>MT-ND2</i>            | 0.66  |
|                            | 5311-5317   | 6         | <i>MT-ND2</i>            | 4.44  |
|                            | 13907-13908 | 1         | <i>MT-ND5</i>            | 6.06  |
|                            | 10339-10340 | 1         | <i>MT-ND3</i>            | 1.80  |
| <b>Insertions</b>          | 6368-6368   | 1         | <i>MT-CO1</i>            | 3.09  |
|                            | 5305-5305   | 15        | <i>MT-ND2</i>            | 0.62  |
|                            | 5308-5308   | 24        | <i>MT-ND2</i>            | 1.07  |
|                            | 6491-6491   | 15        | <i>MT-CO1</i>            | 10.00 |
|                            | 6583-6583   | 85        | <i>MT-CO1</i>            | 14.29 |
| <b>Tandem duplications</b> | 5294-5333   | 39        | <i>MT-ND2</i>            | 3.28  |
|                            | 5295-14065  | 8770      | <i>MT-ND2 ... MT-ND5</i> | 2.21  |
|                            | 5296-12473  | 7177      | <i>MT-ND2 ... MT-ND5</i> | 0.89  |
|                            | 14051-14066 | 15        | <i>MT-ND5</i>            | 5.13  |

Supplementary table 10: Position of SNVs, their consequences, and heteroplasmy percentage in bulk SW620 cell line.

| <b>Substitution</b>  | <b>Consequence</b> | <b>Gene</b>   | <b>Impact</b> | <b>Amino acid change</b> | <b>HET%</b> | <b>Codons</b> | <b>Existing variants</b> | <b>Phenopte data</b> |
|----------------------|--------------------|---------------|---------------|--------------------------|-------------|---------------|--------------------------|----------------------|
| <b>m.7332G&gt;C</b>  | Missense variant   | <i>MT-CO1</i> | MODERATE      | p.A477P                  | 15.38       | Gct/Cct       |                          |                      |
| <b>m.10104C&gt;A</b> | Missense variant   | <i>MT-ND3</i> | MODERATE      | p.L16M                   | 20          | Cta/Ata       |                          |                      |
| <b>m.13759G&gt;A</b> | Missense variant   | <i>MT-ND5</i> | MODERATE      | p.A475T                  | 10          | Gca/Aca       | rs386420024              |                      |

Supplementary table 11: Position of SNVs, their consequences, and heteroplasmy percentage in single SW620 cells.

| Substitution | Consequence      | Gene           | Impact   | Amino acid change | HET%  | Codons  | Existing variants | Phenopte data |
|--------------|------------------|----------------|----------|-------------------|-------|---------|-------------------|---------------|
| m.3397A>C    | Missense variant | <i>MT-ND1</i>  | MODERATE | p.M31L            | 11.76 | Ata/Cta |                   |               |
| m.3400C>T    | Stop-gained      | <i>MT-ND1</i>  | HIGH     | p.Q32X            | 12.5  | Caa/Taa |                   |               |
| m.3430C>A    | Missense variant | <i>MT-ND1</i>  | MODERATE | p.P42T            | 10.53 | Ccc/Acc |                   |               |
| m.3581C>G    | Missense variant | <i>MT-ND1</i>  | MODERATE | p.P92R            | 15    | cCc/cGc |                   |               |
| m.3841T>A    | Stop-gained      | <i>MT-ND1</i>  | HIGH     | p.W179X           | 32.43 | Tga/Aga |                   |               |
| m.3900C>G    | Missense variant | <i>MT-ND1</i>  | MODERATE | p.F198L           | 13.79 | ttC/ttG |                   |               |
| m.3923A>T    | Missense variant | <i>MT-ND1</i>  | MODERATE | p.E206V           | 38.1  | gAa/gTa |                   |               |
| m.4213T>A    | Stop-gained      | <i>MT-ND1</i>  | HIGH     | p.W303X           | 14.06 | Tga/Aga |                   |               |
| m.4508C>A    | Missense variant | <i>MT-ND2</i>  | MODERATE | p.I13M            | 14.29 | atC/atA |                   |               |
| m.4629G>T    | Stop-gained      | <i>MT-ND2</i>  | HIGH     | p.E54X            | 25    | Gaa/Taa |                   |               |
| m.4707C>T    | Missense variant | <i>MT-ND2</i>  | MODERATE | p.L80F            | 20.83 | Ctc/Ttc |                   |               |
| m.4781A>T    | Missense variant | <i>MT-ND2</i>  | MODERATE | p.M104I           | 68.57 | atA/atT |                   |               |
| m.4813T>C    | Missense variant | <i>MT-ND2</i>  | MODERATE | p.V115A           | 52.38 | gTc/gCc |                   |               |
| m.4815C>A    | Missense variant | <i>MT-ND2</i>  | MODERATE | p.P116T           | 14    | Cca/Aca |                   |               |
| m.4909C>T    | Missense variant | <i>MT-ND2</i>  | MODERATE | p.P147L           | 25.86 | cCc/cTc |                   |               |
| m.5247T>C    | Missense variant | <i>MT-ND2</i>  | MODERATE | p.F260L           | 50.6  | Ttt/Ctt |                   |               |
| m.5254C>G    | Missense variant | <i>MT-ND2</i>  | MODERATE | p.P262R           | 11.43 | cCc/cGc |                   |               |
| m.6085A>C    | Missense variant | <i>MT-CO1</i>  | MODERATE | p.H61P            | 93.99 | cAt/cCt |                   |               |
| m.6334A>G    | Missense variant | <i>MT-CO1</i>  | MODERATE | p.D144G           | 21.21 | gAc/gGc |                   |               |
| m.6440C>G    | Stop-gained      | <i>MT-CO1</i>  | HIGH     | p.Y179X           | 28.57 | taC/taG |                   |               |
| m.6501C>T    | Missense variant | <i>MT-CO1</i>  | MODERATE | p.P200S           | 15.13 | Cca/Tca |                   |               |
| m.6630G>T    | Missense variant | <i>MT-CO1</i>  | MODERATE | p.V243F           | 35.9  | Gtt/Ttt |                   |               |
| m.6771C>G    | Missense variant | <i>MT-CO1</i>  | MODERATE | p.H290D           | 21.18 | Cac/Gac |                   |               |
| m.6772A>C    | Missense variant | <i>MT-CO1</i>  | MODERATE | p.H290P           | 11.11 | cAc/cCc |                   |               |
| m.6798G>A    | Missense variant | <i>MT-CO1</i>  | MODERATE | p.V299M           | 37.59 | Gta/Ata |                   |               |
| m.6909G>T    | Missense variant | <i>MT-CO1</i>  | MODERATE | p.A336S           | 30.95 | Gct/Tct |                   |               |
| m.6921T>A    | Stop-gained      | <i>MT-CO1</i>  | HIGH     | p.W340X           | 51.16 | Tga/Aga |                   |               |
| m.7057C>G    | Missense variant | <i>MT-CO1</i>  | MODERATE | p.A385G           | 10.53 | gCt/gGt |                   |               |
| m.7165T>C    | Missense variant | <i>MT-CO1</i>  | MODERATE | p.V421A           | 12.5  | gTa/gCa |                   |               |
| m.7246C>G    | Missense variant | <i>MT-CO1</i>  | MODERATE | p.T448S           | 13.33 | aCc/aGc |                   |               |
| m.7276C>T    | Missense variant | <i>MT-CO1</i>  | MODERATE | p.S458L           | 73.13 | tCa/tTa |                   |               |
| m.7443A>C    | Stop-lost        | <i>MT-CO1</i>  | HIGH     | p.X514R           | 16.13 | Aga/Cga |                   |               |
| m.7700C>G    | Missense variant | <i>MT-CO2</i>  | MODERATE | p.L39V            | 19.15 | Ctg/Gtg |                   |               |
| m.8082C>G    | Missense variant | <i>MT-CO2</i>  | MODERATE | p.P166R           | 15.62 | cCc/cGc |                   |               |
| m.8391G>T    | Missense variant | <i>MT-ATP8</i> | MODERATE | p.W9L             | 15.46 | tGg/tTg |                   |               |
| m.8627C>A    | Missense variant | <i>MT-ATP6</i> | MODERATE | p.S34Y            | 27.27 | tCc/tAc |                   |               |

|                      |                  |                |          |         |       |         |                                                                  |
|----------------------|------------------|----------------|----------|---------|-------|---------|------------------------------------------------------------------|
| <b>m.8710A&gt;C</b>  | Missense variant | <i>MT-ATP6</i> | MODERATE | p.N62H  | 85.71 | Aac/Cac |                                                                  |
| <b>m.8918A&gt;G</b>  | Missense variant | <i>MT-ATP6</i> | MODERATE | p.Q131R | 23.53 | cAa/cGa |                                                                  |
| <b>m.8927C&gt;A</b>  | Missense variant | <i>MT-ATP6</i> | MODERATE | p.P134H | 13.82 | cCt/cAt |                                                                  |
| <b>m.9167T&gt;G</b>  | Missense variant | <i>MT-ATP6</i> | MODERATE | p.F214C | 51.16 | tTc/tGc |                                                                  |
| <b>m.9169A&gt;G</b>  | Missense variant | <i>MT-ATP6</i> | MODERATE | p.T215A | 16.67 | Aca/Gca |                                                                  |
| <b>m.9169A&gt;T</b>  | Missense variant | <i>MT-ATP6</i> | MODERATE | p.T215S | 15.62 | Aca/Tca |                                                                  |
| <b>m.9188A&gt;C</b>  | Missense variant | <i>MT-ATP6</i> | MODERATE | p.Y221S | 14.29 | tAc/tCc |                                                                  |
| <b>m.9398A&gt;C</b>  | Missense variant | <i>MT-CO3</i>  | MODERATE | p.E64D  | 76.06 | gaA/gaC |                                                                  |
| <b>m.9859G&gt;C</b>  | Missense variant | <i>MT-CO3</i>  | MODERATE | p.C218S | 61.76 | tGc/tCc | COSM1138444<br>&<br>COSM1138445<br><a href="#">Kidney tumour</a> |
| <b>m.9942G&gt;T</b>  | Missense variant | <i>MT-CO3</i>  | MODERATE | p.D246Y | 57.25 | Gat/Tat |                                                                  |
| <b>m.9954C&gt;A</b>  | Missense variant | <i>MT-CO3</i>  | MODERATE | p.L250M | 10.26 | Cta/Ata |                                                                  |
| <b>m.9965T&gt;G</b>  | Stop-gained      | <i>MT-CO3</i>  | HIGH     | p.Y253X | 17.53 | taT/taG |                                                                  |
| <b>m.10098G&gt;T</b> | Missense variant | <i>MT-ND3</i>  | MODERATE | p.A14S  | 16.67 | Gcc/Tcc |                                                                  |
| <b>m.10213C&gt;G</b> | Missense variant | <i>MT-ND3</i>  | MODERATE | p.S52C  | 21.05 | tCc/tGc |                                                                  |
| <b>m.10242T&gt;G</b> | Missense variant | <i>MT-ND3</i>  | MODERATE | p.F62V  | 28.89 | Ttc/Gtc |                                                                  |
| <b>m.10255A&gt;T</b> | Missense variant | <i>MT-ND3</i>  | MODERATE | p.D66V  | 21.95 | gAt/gTt |                                                                  |
| <b>m.10543A&gt;C</b> | Missense variant | <i>MT-ND4L</i> | MODERATE | p.H25P  | 21.88 | cAc/cCc |                                                                  |
| <b>m.10656A&gt;G</b> | Missense variant | <i>MT-ND4L</i> | MODERATE | p.M63V  | 45.45 | Ata/Gta | rs28645634                                                       |
| <b>m.10665T&gt;C</b> | Missense variant | <i>MT-ND4L</i> | MODERATE | p.F66L  | 27.12 | Ttt/Ctt |                                                                  |
| <b>m.10722T&gt;C</b> | Missense variant | <i>MT-ND4L</i> | MODERATE | p.Y85H  | 72.22 | Tat/Cat |                                                                  |
| <b>m.10731G&gt;C</b> | Missense variant | <i>MT-ND4L</i> | MODERATE | p.D88H  | 13.95 | Gac/Cac |                                                                  |
| <b>m.10997A&gt;G</b> | Missense variant | <i>MT-ND4</i>  | MODERATE | p.S80G  | 32.35 | Agc/Ggc |                                                                  |
| <b>m.11000C&gt;A</b> | Missense variant | <i>MT-ND4</i>  | MODERATE | p.Q81K  | 83.91 | Caa/Aaa |                                                                  |
| <b>m.11051A&gt;G</b> | Missense variant | <i>MT-ND4</i>  | MODERATE | p.M98V  | 21.88 | Ata/Gta |                                                                  |
| <b>m.11053A&gt;C</b> | Missense variant | <i>MT-ND4</i>  | MODERATE | p.M98I  | 34    | atA/atC |                                                                  |
| <b>m.11063C&gt;G</b> | Missense variant | <i>MT-ND4</i>  | MODERATE | p.L102V | 10.81 | Cta/Gta |                                                                  |
| <b>m.11090A&gt;C</b> | Missense variant | <i>MT-ND4</i>  | MODERATE | p.T111P | 88.89 | Aca/Cca |                                                                  |
| <b>m.11101A&gt;C</b> | Missense variant | <i>MT-ND4</i>  | MODERATE | p.E114D | 63.83 | gaA/gaC |                                                                  |
| <b>m.11181A&gt;T</b> | Missense variant | <i>MT-ND4</i>  | MODERATE | p.E141V | 28.57 | gAa/gTa |                                                                  |
| <b>m.11187T&gt;G</b> | Missense variant | <i>MT-ND4</i>  | MODERATE | p.L143R | 58.82 | cTg/cGg |                                                                  |
| <b>m.11325C&gt;T</b> | Missense variant | <i>MT-ND4</i>  | MODERATE | p.S189F | 19.72 | tCc/tTc |                                                                  |
| <b>m.11354T&gt;C</b> | Missense variant | <i>MT-ND4</i>  | MODERATE | p.Y199H | 10.08 | Tac/Cac |                                                                  |
| <b>m.11501C&gt;A</b> | Missense variant | <i>MT-ND4</i>  | MODERATE | p.L248I | 46.88 | Ctc/Atc |                                                                  |
| <b>m.11502T&gt;A</b> | Missense variant | <i>MT-ND4</i>  | MODERATE | p.L248H | 17.28 | cTc/cAc |                                                                  |
| <b>m.11726T&gt;C</b> | Missense variant | <i>MT-ND4</i>  | MODERATE | p.S323P | 14.06 | Tcc/Ccc |                                                                  |
| <b>m.11894C&gt;G</b> | Missense variant | <i>MT-ND4</i>  | MODERATE | p.L379V | 13.89 | Ctc/Gtc |                                                                  |
| <b>m.11895T&gt;C</b> | Missense variant | <i>MT-ND4</i>  | MODERATE | p.L379P | 38.71 | cTc/cCc |                                                                  |
| <b>m.12030A&gt;C</b> | Missense variant | <i>MT-ND4</i>  | MODERATE | p.N424T | 28.04 | aAc/aCc |                                                                  |
| <b>m.12048T&gt;A</b> | Missense variant | <i>MT-ND4</i>  | MODERATE | p.F430Y | 30.95 | tTc/tAc |                                                                  |

|                      |                  |               |          |         |       |         |                                 |                                     |
|----------------------|------------------|---------------|----------|---------|-------|---------|---------------------------------|-------------------------------------|
| <b>m.12075T&gt;C</b> | Missense variant | <i>MT-ND4</i> | MODERATE | p.M439T | 16.22 | aTa/aCa |                                 |                                     |
| <b>m.12087C&gt;A</b> | Missense variant | <i>MT-ND4</i> | MODERATE | p.P443H | 21.6  | cCc/cAc |                                 |                                     |
| <b>m.12631T&gt;A</b> | Missense variant | <i>MT-ND5</i> | MODERATE | p.S99T  | 47.92 | Tcc/Acc |                                 |                                     |
| <b>m.12655T&gt;C</b> | Missense variant | <i>MT-ND5</i> | MODERATE | p.Y107H | 10    | Tat/Cat |                                 |                                     |
| <b>m.12669C&gt;A</b> | Missense variant | <i>MT-ND5</i> | MODERATE | p.D111E | 78.85 | gaC/gaA |                                 |                                     |
| <b>m.12703A&gt;T</b> | Missense variant | <i>MT-ND5</i> | MODERATE | p.I123F | 17.14 | Atc/Ttc |                                 |                                     |
| <b>m.12928C&gt;A</b> | Missense variant | <i>MT-ND5</i> | MODERATE | p.P198T | 20    | Cca/Aca |                                 |                                     |
| <b>m.13153A&gt;C</b> | Missense variant | <i>MT-ND5</i> | MODERATE | p.I273L | 46.81 | Atc/Ctc |                                 |                                     |
| <b>m.13462G&gt;T</b> | Missense variant | <i>MT-ND5</i> | MODERATE | p.G376C | 31.91 | Ggc/Tgc |                                 |                                     |
| <b>m.13621C&gt;G</b> | Missense variant | <i>MT-ND5</i> | MODERATE | p.L429V | 72.22 | Ctc/Gtc |                                 |                                     |
| <b>m.13678C&gt;A</b> | Missense variant | <i>MT-ND5</i> | MODERATE | p.P448T | 34.58 | Ccc/Acc |                                 |                                     |
| <b>m.13994T&gt;C</b> | Missense variant | <i>MT-ND5</i> | MODERATE | p.L553P | 36.17 | cTa/cCa | COSM6716769                     | <b><u>Large intestine tumor</u></b> |
| <b>m.14107T&gt;A</b> | Missense variant | <i>MT-ND5</i> | MODERATE | p.F591I | 17.14 | Ttc/Atc |                                 |                                     |
| <b>m.14107T&gt;C</b> | Missense variant | <i>MT-ND5</i> | MODERATE | p.F591L | 40    | Ttc/Ctc |                                 |                                     |
| <b>m.14110T&gt;G</b> | Missense variant | <i>MT-ND5</i> | MODERATE | p.F592V | 22.64 | Ttc/Gtc | COSM6716773                     | <b><u>Large intestine tumor</u></b> |
| <b>m.14181A&gt;G</b> | Missense variant | <i>MT-ND6</i> | MODERATE | p.Y165H | 25.71 | Tat/Cat |                                 |                                     |
| <b>m.14360C&gt;T</b> | Stop-gained      | <i>MT-ND6</i> | HIGH     | p.W105X | 70.59 | tGg/tAg |                                 |                                     |
| <b>m.14553C&gt;T</b> | Missense variant | <i>MT-ND6</i> | MODERATE | p.V41I  | 50    | Gtt/Att |                                 |                                     |
| <b>m.14561A&gt;T</b> | Missense variant | <i>MT-ND6</i> | MODERATE | p.V38D  | 15    | gTc/gAc |                                 |                                     |
| <b>m.14648C&gt;T</b> | Missense variant | <i>MT-ND6</i> | MODERATE | p.S9N   | 19.51 | aGt/aAt |                                 |                                     |
| <b>m.14758A&gt;T</b> | Missense variant | <i>MT-CYB</i> | MODERATE | p.M4I   | 11.43 | atA/atT |                                 |                                     |
| <b>m.14886C&gt;T</b> | Missense variant | <i>MT-CYB</i> | MODERATE | p.T47M  | 25.71 | aCa/aTa |                                 |                                     |
| <b>m.14961A&gt;T</b> | Missense variant | <i>MT-CYB</i> | MODERATE | p.D72V  | 30.3  | gAc/gTc |                                 |                                     |
| <b>m.15018T&gt;C</b> | Missense variant | <i>MT-CYB</i> | MODERATE | p.F91S  | 27.12 | tTt/tCt |                                 |                                     |
| <b>m.15257G&gt;T</b> | Missense variant | <i>MT-CYB</i> | MODERATE | p.D171Y | 97.56 | Gac/Tac | COSM1138306<br>&<br>COSM1138307 | <b><u>Kidney tumour</u></b>         |
| <b>m.15312T&gt;A</b> | Missense variant | <i>MT-CYB</i> | MODERATE | p.I189N | 53.33 | aTt/aAt |                                 |                                     |
| <b>m.15482T&gt;A</b> | Missense variant | <i>MT-CYB</i> | MODERATE | p.S246T | 15.62 | Tca/Aca |                                 |                                     |
| <b>m.15503C&gt;A</b> | Missense variant | <i>MT-CYB</i> | MODERATE | p.P253T | 20    | Cca/Aca |                                 |                                     |
| <b>m.15692A&gt;T</b> | Missense variant | <i>MT-CYB</i> | MODERATE | p.M316L | 16    | Ata/Tta |                                 |                                     |

Supplementary table 12: Position of SVs and their heteroplasmy percentage in single myeloid cells obtained from healthy donors.

| Type of SVs       | Breakpoints | Size (nt) | Gene           | HET%  |
|-------------------|-------------|-----------|----------------|-------|
| <b>Deletions</b>  | 105-106     | 1         | D-loop         | 2.35  |
|                   | 16-17       | 1         | D-loop         | 2.63  |
|                   | 115-116     | 1         | D-loop         | 18.97 |
|                   | 119-120     | 1         | D-loop         | 12.24 |
|                   | 2703-2704   | 1         | <i>MT-RNR2</i> | 27.94 |
|                   | 16230-16232 | 2         | D-loop         | 4.60  |
|                   | 16275-16276 | 1         | D-loop         | 1.75  |
|                   | 16454-16455 | 1         | D-loop         | 2.93  |
|                   | 2457-2458   | 1         | <i>MT-RNR2</i> | 2.70  |
|                   | 4894-5317   | 423       | <i>MT-ND2</i>  | 20.00 |
| <b>Inversions</b> | 65-273      | 208       | D-loop         | 19.23 |
|                   | 2499-2591   | 92        | <i>MT-RNR2</i> | 1.79  |
|                   | 2499-2693   | 194       | <i>MT-RNR2</i> | 30.82 |
|                   | 2642-2731   | 89        | <i>MT-RNR2</i> | 4.84  |
|                   | 16291-16471 | 184       | D-loop         | 1.65  |
| <b>Insertions</b> | 5-5         | 4         | D-loop         | 9.38  |
|                   | 98-98       | 8         | D-loop         | 3.77  |
|                   | 107-107     | 12        | D-loop         | 32.56 |
|                   | 110-110     | 4         | D-loop         | 11.94 |
|                   | 277-277     | 1         | D-loop         | 6.82  |
|                   | 288-288     | 5         | D-loop         | 18.18 |
|                   | 339-339     | 1         | D-loop         | 9.52  |
|                   | 341-341     | 2         | D-loop         | 12.50 |
|                   | 2330-2330   | 2         | <i>MT-RNR2</i> | 28.12 |
|                   | 2502-2502   | 8         | <i>MT-RNR2</i> | 2.40  |
|                   | 16223-16223 | 6         | D-loop         | 15.38 |
|                   | 16229-16229 | 4         | D-loop         | 39.73 |
|                   | 16269-16269 | 3         | D-loop         | 3.20  |
|                   | 16278-16278 | 4         | D-loop         | 12.29 |
|                   | 16289-16289 | 1         | D-loop         | 1.11  |
|                   | 16374-16374 | 1         | D-loop         | 1.06  |
|                   | 16461-16461 | 14        | D-loop         | 5.79  |
|                   | 16528-16528 | 9         | D-loop         | 2.15  |
|                   | 16560-16560 | 21        | D-loop         | 10.96 |
|                   | 16561-16561 | 24        | D-loop         | 1.14  |
| 16562-16562       | 18          | D-loop    | 1.13           |       |
| 16563-16563       | 7           | D-loop    | 1.88           |       |

---

|             |    |        |       |
|-------------|----|--------|-------|
| 16564-16564 | 15 | D-loop | 6..33 |
| 16565-16565 | 9  | D-loop | 7.19  |

---

Supplementary table 13: Position of SNVs, their consequences, and heteroplasmy percentage in single myeloid cells obtained from healthy donors.

| Substitution | Consequence      | Gene           | Impact   | Amino acid change | HET%  | Codons  | Existing variants               | Phenotype data             |
|--------------|------------------|----------------|----------|-------------------|-------|---------|---------------------------------|----------------------------|
| m.3356T>C    | Missense variant | <i>MT-ND1</i>  | MODERATE | p.M17T            | 58.24 | aTg/aCg |                                 |                            |
| m.3697G>C    | Missense variant | <i>MT-ND1</i>  | MODERATE | p.G131R           | 32.89 | Ggc/Cgc | COSM6119903<br>&<br>COSM6119904 | <a href="#">Lung tumor</a> |
| m.3958G>C    | Missense variant | <i>MT-ND1</i>  | MODERATE | p.G218R           | 32.69 | Ggc/Cgc |                                 |                            |
| m.4069T>G    | Missense variant | <i>MT-ND1</i>  | MODERATE | p.Y255D           | 47.62 | Tac/Gac |                                 |                            |
| m.4160T>A    | Missense variant | <i>MT-ND1</i>  | MODERATE | p.L285H           | 42.86 | cTc/cAc |                                 |                            |
| m.4516G>A    | Missense variant | <i>MT-ND2</i>  | MODERATE | p.G16D            | 24.63 | gGc/gAc |                                 |                            |
| m.4543A>C    | Missense variant | <i>MT-ND2</i>  | MODERATE | p.H25P            | 46.05 | cAc/cCc |                                 |                            |
| m.4662A>G    | Missense variant | <i>MT-ND2</i>  | MODERATE | p.T65A            | 79.29 | Acc/Gcc |                                 |                            |
| m.4909C>T    | Missense variant | <i>MT-ND2</i>  | MODERATE | p.P147L           | 30.83 | cCc/cTc |                                 |                            |
| m.4935A>T    | Missense variant | <i>MT-ND2</i>  | MODERATE | p.T156S           | 81.14 | Act/Tct |                                 |                            |
| m.5206C>T    | Missense variant | <i>MT-ND2</i>  | MODERATE | p.S246F           | 50    | tCc/tTc |                                 |                            |
| m.5304C>A    | Missense variant | <i>MT-ND2</i>  | MODERATE | p.P279T           | 67.94 | Ccc/Acc |                                 |                            |
| m.5305C>T    | Missense variant | <i>MT-ND2</i>  | MODERATE | p.P279L           | 75.58 | cCc/cTc |                                 |                            |
| m.5911C>T    | Missense variant | <i>MT-CO1</i>  | MODERATE | p.A3V             | 16.16 | gCc/gTc | rs879227822                     |                            |
| m.5943G>T    | Missense variant | <i>MT-CO1</i>  | MODERATE | p.D14Y            | 81    | Gac/Tac |                                 |                            |
| m.6088C>T    | Missense variant | <i>MT-CO1</i>  | MODERATE | p.A62V            | 46.48 | gCa/gTa |                                 |                            |
| m.6147C>A    | Missense variant | <i>MT-CO1</i>  | MODERATE | p.L82M            | 40.5  | Cta/Ata |                                 |                            |
| m.6223C>T    | Missense variant | <i>MT-CO1</i>  | MODERATE | p.P107L           | 71.97 | cCc/cTc |                                 |                            |
| m.6519A>G    | Missense variant | <i>MT-CO1</i>  | MODERATE | p.I206V           | 55.43 | Atc/Gtc |                                 |                            |
| m.6544A>G    | Missense variant | <i>MT-CO1</i>  | MODERATE | p.N214S           | 67.88 | aAc/aGc |                                 |                            |
| m.6939T>G    | Missense variant | <i>MT-CO1</i>  | MODERATE | p.F346V           | 92.9  | Ttt/Gtt |                                 |                            |
| m.7213C>G    | Missense variant | <i>MT-CO1</i>  | MODERATE | p.P437R           | 11.7  | cCc/cGc |                                 |                            |
| m.8559C>T    | Missense variant | <i>MT-ATP8</i> | MODERATE | p.P65L            | 73.58 | cCc/cTc |                                 |                            |
| m.8852G>C    | Missense variant | <i>MT-ATP6</i> | MODERATE | p.W109S           | 24.26 | tGa/tCa |                                 |                            |
| m.8927C>A    | Missense variant | <i>MT-ATP6</i> | MODERATE | p.P134H           | 57.14 | cCt/cAt |                                 |                            |
| m.9022G>C    | Missense variant | <i>MT-ATP6</i> | MODERATE | p.A166P           | 4.1   | Gca/Cca |                                 |                            |
| m.9352C>G    | Missense variant | <i>MT-CO3</i>  | MODERATE | p.T49S            | 50.86 | aCc/aGc |                                 |                            |
| m.9402A>G    | Missense variant | <i>MT-CO3</i>  | MODERATE | p.T66A            | 43.66 | Aca/Gca |                                 |                            |
| m.9567A>G    | Missense variant | <i>MT-CO3</i>  | MODERATE | p.I121V           | 51.28 | Atc/Gtc |                                 |                            |
| m.9964A>C    | Missense variant | <i>MT-CO3</i>  | MODERATE | p.Y253S           | 51.38 | tAt/tCt |                                 |                            |
| m.10201G>T   | Missense variant | <i>MT-ND3</i>  | MODERATE | p.R48L            | 6.12  | cGc/cTc |                                 |                            |
| m.10206C>G   | Missense variant | <i>MT-ND3</i>  | MODERATE | p.P50A            | 46.49 | Cct/Gct |                                 |                            |
| m.10835A>G   | Missense variant | <i>MT-ND4</i>  | MODERATE | p.N26D            | 44.55 | Aac/Gac |                                 |                            |
| m.11173C>G   | Missense variant | <i>MT-ND4</i>  | MODERATE | p.N138K           | 36.14 | aaC/aaG |                                 |                            |
| m.11189A>T   | Missense variant | <i>MT-ND4</i>  | MODERATE | p.N144Y           | 81.86 | Aac/Tac |                                 |                            |



|                      |                  |               |          |         |       |         |                                 |                                       |
|----------------------|------------------|---------------|----------|---------|-------|---------|---------------------------------|---------------------------------------|
| <b>m.11297A&gt;T</b> | Missense variant | <i>MT-ND4</i> | MODERATE | p.T180S | 64.04 | Act/Tct |                                 |                                       |
| <b>m.11303A&gt;T</b> | Missense variant | <i>MT-ND4</i> | MODERATE | p.T182S | 20.87 | Act/Tct |                                 |                                       |
| <b>m.11715A&gt;G</b> | Missense variant | <i>MT-ND4</i> | MODERATE | p.H319R | 40.37 | cAc/cGc |                                 |                                       |
| <b>m.11909A&gt;C</b> | Missense variant | <i>MT-ND4</i> | MODERATE | p.T384P | 37.04 | Acc/Ccc | COSM1155515<br>&<br>COSM1155516 | <a href="#">Endometrium tumor</a>     |
| <b>m.11910C&gt;G</b> | Missense variant | <i>MT-ND4</i> | MODERATE | p.T384S | 35.66 | aCc/aGc |                                 |                                       |
| <b>m.12470T&gt;C</b> | Missense variant | <i>MT-ND5</i> | MODERATE | p.I45T  | 73.77 | aTt/aCt |                                 |                                       |
| <b>m.12506T&gt;A</b> | Missense variant | <i>MT-ND5</i> | MODERATE | p.L57Q  | 57.14 | cTa/cAa |                                 |                                       |
| <b>m.12628T&gt;G</b> | Missense variant | <i>MT-ND5</i> | MODERATE | p.W98G  | 37.63 | Tgg/Ggg |                                 |                                       |
| <b>m.12933A&gt;T</b> | Missense variant | <i>MT-ND5</i> | MODERATE | p.Q199H | 48.64 | caA/caT |                                 |                                       |
| <b>m.12935A&gt;G</b> | Missense variant | <i>MT-ND5</i> | MODERATE | p.Q200R | 10    | cAa/cGa |                                 |                                       |
| <b>m.13073T&gt;C</b> | Missense variant | <i>MT-ND5</i> | MODERATE | p.L246P | 46.38 | cTa/cCa | COSM6716796                     | <a href="#">Large intestine tumor</a> |
| <b>m.13285A&gt;C</b> | Missense variant | <i>MT-ND5</i> | MODERATE | p.I317L | 24.32 | Atc/Ctc |                                 |                                       |
| <b>m.13357A&gt;G</b> | Missense variant | <i>MT-ND5</i> | MODERATE | p.M341V | 43.55 | Atg/Gtg |                                 |                                       |
| <b>m.13392T&gt;G</b> | Missense variant | <i>MT-ND5</i> | MODERATE | p.N352K | 59.22 | aaT/aaG |                                 |                                       |
| <b>m.13541C&gt;A</b> | Missense variant | <i>MT-ND5</i> | HIGH     | p.S402X | 10.03 | tCa/tAa |                                 |                                       |
| <b>m.13811C&gt;A</b> | Missense variant | <i>MT-ND5</i> | MODERATE | p.A492D | 84.69 | gCt/gAt |                                 |                                       |
| <b>m.13889G&gt;A</b> | Missense variant | <i>MT-ND5</i> | MODERATE | p.C518Y | 60    | tGc/tAc |                                 |                                       |
| <b>m.14062A&gt;T</b> | Missense variant | <i>MT-ND5</i> | MODERATE | p.I576F | 60.87 | Atc/Ttc |                                 |                                       |
| <b>m.14107T&gt;G</b> | Missense variant | <i>MT-ND5</i> | MODERATE | p.F591V | 18.04 | Ttc/Gtc |                                 |                                       |
| <b>m.14178T&gt;C</b> | Missense variant | <i>MT-ND6</i> | MODERATE | p.I166V | 54.05 | Att/Gtt | rs28357671                      |                                       |
| <b>m.14351T&gt;A</b> | Missense variant | <i>MT-ND6</i> | MODERATE | p.E108V | 34.85 | gAg/gTg | COSM1155555<br>&<br>COSM1155556 | <a href="#">Endometrium tumor</a>     |
| <b>m.14357A&gt;T</b> | Missense variant | <i>MT-ND6</i> | MODERATE | p.V106E | 78.67 | gTg/gAg |                                 |                                       |
| <b>m.14796C&gt;G</b> | Missense variant | <i>MT-CYB</i> | MODERATE | p.S17W  | 50    | tCa/tGa |                                 |                                       |
| <b>m.14801A&gt;G</b> | Missense variant | <i>MT-CYB</i> | MODERATE | p.I19V  | 45.12 | Atc/Gtc |                                 |                                       |
| <b>m.15039T&gt;G</b> | Missense variant | <i>MT-CYB</i> | MODERATE | p.I98S  | 43.04 | aTc/aGc |                                 |                                       |
| <b>m.15209T&gt;C</b> | Missense variant | <i>MT-CYB</i> | MODERATE | p.Y155H | 61.7  | Tac/Cac |                                 |                                       |
| <b>m.15210A&gt;C</b> | Missense variant | <i>MT-CYB</i> | MODERATE | p.Y155S | 2.67  | tAc/tCc |                                 |                                       |
| <b>m.15219C&gt;A</b> | Missense variant | <i>MT-CYB</i> | MODERATE | p.T158K | 36.36 | aCa/aAa |                                 |                                       |
| <b>m.15231A&gt;G</b> | Missense variant | <i>MT-CYB</i> | MODERATE | p.Q162R | 44.78 | cAa/cGa |                                 |                                       |
| <b>m.15257G&gt;C</b> | Missense variant | <i>MT-CYB</i> | MODERATE | p.D171H | 45.57 | Gac/Cac | COSM1138306<br>&<br>COSM1138307 | <a href="#">Kidney tumor</a>          |
| <b>m.15438G&gt;T</b> | Missense variant | <i>MT-CYB</i> | MODERATE | p.G231V | 38.05 | gGc/gTc |                                 |                                       |

Supplementary table 14: Position of SVs and their heteroplasmy percentage in bulk myeloid cells from 3 AML patients.

| Type of SVs               | Breakpoints | Size (nt) | Gene           | HET% |
|---------------------------|-------------|-----------|----------------|------|
| <b>Deletion</b>           | 68-73       | 4         | D-LOOP         | 1.75 |
|                           | 7027-7035   | 7         | <i>MT-CO1</i>  | 0.37 |
|                           | 8802-8809   | 6         | <i>MT-ATP6</i> | 0.22 |
| <b>Inversion</b>          | 2735-2796   | 62        | <i>MT-RNR2</i> | 0.23 |
|                           | 7166-7230   | 63        | <i>MT-CO1</i>  | 0.69 |
|                           | 10521-10566 | 58        | <i>MT-ND4L</i> | 0.32 |
|                           | 9224-9303   | 78        | <i>MT-CO3</i>  | 0.78 |
| <b>Tandem duplication</b> | 6328-7163   | 834       | <i>MT-CO1</i>  | 0.71 |
|                           | 13794-13858 | 63        | <i>MT-ND5</i>  | 0.85 |

Supplementary table 15: Position of SVs and their heteroplasmy percentage in single myeloid cells from 3 AML patients.

| Type of SVs | Breakpoints | Size (nt) | Gene                     | HET%   |
|-------------|-------------|-----------|--------------------------|--------|
| Deletions   | 297–349     | 52        | D-LOOP                   | 3.45   |
|             | 2457–2458   | 1         | <i>MT-RNR2</i>           | 3.45   |
|             | 2703–2704   | 1         | <i>MT-RNR2</i>           | 12.50  |
|             | 10650–10651 | 1         | <i>MT-ND4L</i>           | 10.61  |
|             | 12083–12386 | 303       | <i>MT-ND4 ... MT-ND5</i> | 25.00  |
|             | 12296–12297 | 1         | <i>MT-ND5</i>            | 5.41   |
|             | 13041–13042 | 1         | <i>MT-ND5</i>            | 4.17   |
|             | 16207–16209 | 2         | D-LOOP                   | 15.38  |
|             | 16211–16212 | 1         | D-LOOP                   | 8.70   |
| Inversions  | 120–229     | 109       | D-LOOP                   | 1.85   |
|             | 170–251     | 81        | D-LOOP                   | 17.74  |
|             | 559–653     | 94        | D-LOOP                   | 15.38  |
|             | 628–725     | 97        | <i>MT-RNR1</i>           | 33.33  |
|             | 2410–2600   | 190       | D-LOOP                   | 10.42  |
|             | 2496–2697   | 201       | D-LOOP                   | 30.21  |
|             | 2641–2826   | 185       | D-LOOP                   | 26.83  |
|             | 10658–10722 | 64        | <i>MT-ND4L</i>           | 11.11  |
|             | 11307–11456 | 149       | <i>MT-ND4</i>            | 30.00  |
|             | 12062–12126 | 64        | <i>MT-ND4</i>            | 12.50  |
|             | 12297–12507 | 210       | <i>MT-TL2</i>            | 40.00  |
|             | 13179–13466 | 287       | <i>MT-ND5</i>            | 48.00  |
|             | Insertions  | 4–4       | 18                       | D-LOOP |
| 65–65       |             | 1         | D-LOOP                   | 10.00  |
| 114–114     |             | 6         | D-LOOP                   | 2.16   |
| 176–176     |             | 4         | D-LOOP                   | 8.41   |
| 179–179     |             | 4         | D-LOOP                   | 1.98   |
| 181–181     |             | 1         | D-LOOP                   | 3.37   |
| 306–306     |             | 11        | D-LOOP                   | 1.15   |
| 326–326     |             | 1         | D-LOOP                   | 11.32  |
| 328–328     |             | 1         | D-LOOP                   | 10.17  |
| 334–334     |             | 6         | D-LOOP                   | 9.09   |
| 548–548     |             | 3         | D-LOOP                   | 8.00   |
| 660–660     |             | 10        | <i>MT-RNR1</i>           | 15.00  |
| 711–711     |             | 3         | <i>MT-RNR1</i>           | 3.28   |
| 719–719     |             | 1         | <i>MT-RNR1</i>           | 10.34  |
| 1005–1005   |             | 1         | <i>MT-RNR1</i>           | 4.65   |
| 1007–1007   |             | 3         | <i>MT-RNR1</i>           | 7.89   |

|                            |             |     |                |       |
|----------------------------|-------------|-----|----------------|-------|
|                            | 1013–1013   | 1   | MT-RNR1        | 7.69  |
|                            | 2337–2337   | 4   | MT-RNR2        | 25.93 |
|                            | 2422–2422   | 2   | <i>MT-RNR2</i> | 2.15  |
|                            | 2457–2457   | 1   | <i>MT-RNR2</i> | 13.64 |
|                            | 2502–2502   | 3   | <i>MT-RNR2</i> | 3.19  |
|                            | 2591–2591   | 1   | <i>MT-RNR2</i> | 2.25  |
|                            | 2641–2641   | 1   | <i>MT-RNR2</i> | 5.17  |
|                            | 2690–2690   | 1   | <i>MT-RNR2</i> | 5.26  |
|                            | 3507–3507   | 27  | MT-ND1         | 14.29 |
|                            | 4518–4518   | 127 | <i>MT-ND2</i>  | 50.00 |
|                            | 4735–4735   | 1   | <i>MT-ND2</i>  | 17.39 |
|                            | 10506–10506 | 1   | <i>MT-ND4L</i> | 10.53 |
|                            | 10720–10720 | 2   | <i>MT-ND4L</i> | 10.42 |
|                            | 11264–11264 | 1   | <i>MT-ND4</i>  | 3.28  |
|                            | 11976–11976 | 3   | <i>MT-ND4</i>  | 6.06  |
|                            | 13054–13054 | 4   | <i>MT-ND5</i>  | 1.72  |
|                            | 13179–13179 | 1   | <i>MT-ND5</i>  | 4.65  |
|                            | 13469–13469 | 1   | <i>MT-ND5</i>  | 50.00 |
|                            | 13473–13473 | 5   | <i>MT-ND5</i>  | 24.00 |
|                            | 13477–13477 | 3   | <i>MT-ND5</i>  | 6.90  |
|                            | 13540–13540 | 1   | <i>MT-ND5</i>  | 10.26 |
|                            | 16392–16392 | 2   | D-LOOP         | 6.06  |
|                            | 13043–13410 | 367 | <i>MT-ND5</i>  | 17.65 |
| <b>Tandem duplications</b> | 13058–13129 | 71  | <i>MT-ND5</i>  | 11.76 |

Supplementary table 16: Position of SNVs, their consequences, and heteroplasmy percentage in bulk myeloid cells from 3 AML patients.

| Substitution | Consequence      | Gene          | Impact   | Amino acid substitution | Codons  | HET%  | Existing variants | Phenotype data |
|--------------|------------------|---------------|----------|-------------------------|---------|-------|-------------------|----------------|
| m.3322C>A    | Missense variant | <i>MT-ND1</i> | MODERATE | p.L6I                   | Ctc/Atc | 12.78 |                   |                |
| m.3359C>A    | Missense variant | <i>MT-ND1</i> | MODERATE | p.A18E                  | gCa/gAa | 15.56 |                   |                |
| m.3406C>G    | Missense variant | <i>MT-ND1</i> | MODERATE | p.R34G                  | Cgc/Ggc | 41.67 |                   |                |
| m.3459C>G    | Missense variant | <i>MT-ND1</i> | MODERATE | p.D51E                  | gaC/gaG | 30.77 |                   |                |
| m.3474C>G    | Missense variant | <i>MT-ND1</i> | MODERATE | p.F56L                  | ttC/ttG | 13.69 |                   |                |
| m.3549C>G    | Missense variant | <i>MT-ND1</i> | MODERATE | p.I81M                  | atC/atG | 11.76 |                   |                |
| m.3566C>A    | Missense variant | <i>MT-ND1</i> | MODERATE | p.T87N                  | aCc/aAc | 15.38 |                   |                |
| m.3593T>G    | Missense variant | <i>MT-ND1</i> | MODERATE | p.V96G                  | gTc/gGc | 18    |                   |                |
| m.3602A>G    | Missense variant | <i>MT-ND1</i> | MODERATE | p.N99S                  | aAc/aGc | 12.32 |                   |                |
| m.3626C>A    | Missense variant | <i>MT-ND1</i> | MODERATE | p.A107D                 | gCc/gAc | 15    |                   |                |
| m.3700G>T    | Missense variant | <i>MT-ND1</i> | MODERATE | p.A132S                 | Gca/Tca | 10.61 |                   |                |
| m.3706C>G    | Missense variant | <i>MT-ND1</i> | MODERATE | p.R134G                 | Cga/Gga | 13.04 |                   |                |
| m.3785T>G    | Missense variant | <i>MT-ND1</i> | MODERATE | p.F160C                 | tTt/tGt | 13.08 |                   |                |
| m.3875T>G    | Missense variant | <i>MT-ND1</i> | MODERATE | p.L190R                 | cTa/cGa | 12.77 |                   |                |
| m.3900C>G    | Missense variant | <i>MT-ND1</i> | MODERATE | p.F198L                 | ttC/ttG | 30    |                   |                |
| m.3910G>T    | Stop-gained      | <i>MT-ND1</i> | HIGH     | p.E202X                 | Gaa/Taa | 12.3  |                   |                |
| m.3945C>G    | Missense variant | <i>MT-ND1</i> | MODERATE | p.I213M                 | atC/atG | 44.15 |                   |                |
| m.4024A>G    | Missense variant | <i>MT-ND1</i> | MODERATE | p.T240A                 | Aca/Gca | 13.43 |                   |                |
| m.4039A>C    | Missense variant | <i>MT-ND1</i> | MODERATE | p.T245P                 | Aca/Cca | 12.9  |                   |                |
| m.4064A>C    | Missense variant | <i>MT-ND1</i> | MODERATE | p.E253A                 | gAa/gCa | 13.64 |                   |                |
| m.4090A>C    | Missense variant | <i>MT-ND1</i> | MODERATE | p.K262Q                 | Aag/Cag | 13.47 |                   |                |
| m.4234A>C    | Missense variant | <i>MT-ND1</i> | MODERATE | p.T310P                 | Aca/Cca | 13.64 |                   |                |
| m.4237A>T    | Missense variant | <i>MT-ND1</i> | MODERATE | p.I311F                 | Atc/Ttc | 15.62 |                   |                |
| m.4540C>T    | Missense variant | <i>MT-ND2</i> | MODERATE | p.S24L                  | tCg/tTg | 10.53 |                   |                |
| m.4548T>G    | Missense variant | <i>MT-ND2</i> | MODERATE | p.F27V                  | Ttt/Gtt | 10.34 |                   |                |
| m.4638A>T    | Missense variant | <i>MT-ND2</i> | MODERATE | p.I57F                  | Atc/Ttc | 10    |                   |                |
| m.4646T>A    | Stop-gained      | <i>MT-ND2</i> | HIGH     | p.Y59X                  | taT/taA | 10.36 |                   |                |
| m.4654C>G    | Stop-gained      | <i>MT-ND2</i> | HIGH     | p.T62X                  | aCg/aGg | 20    |                   |                |
| m.4762T>A    | Missense variant | <i>MT-ND2</i> | MODERATE | p.I98N                  | aTc/aAc | 28.57 |                   |                |
| m.4822T>G    | Missense variant | <i>MT-ND2</i> | MODERATE | p.V118G                 | gTt/gGt | 11.11 | rs28571027        |                |
| m.4879C>A    | Missense variant | <i>MT-ND2</i> | MODERATE | p.A137D                 | gCc/gAc | 11.81 |                   |                |
| m.4966G>C    | Missense variant | <i>MT-ND2</i> | MODERATE | p.S166T                 | aGt/aCt | 10.33 |                   |                |
| m.5056A>C    | Missense variant | <i>MT-ND2</i> | MODERATE | p.Y196S                 | tAc/tCc | 11.76 |                   |                |
| m.5073A>C    | Missense variant | <i>MT-ND2</i> | MODERATE | p.I202L                 | Att/Ctt | 12.5  |                   |                |
| m.5198A>C    | Missense variant | <i>MT-ND2</i> | MODERATE | p.L243F                 | ttA/ttC | 11.76 |                   |                |
| m.5206C>T    | Missense variant | <i>MT-ND2</i> | MODERATE | p.S246F                 | tCc/tTc | 23.2  |                   |                |
| m.5212T>G    | Missense variant | <i>MT-ND2</i> | MODERATE | p.L248R                 | cTc/cGc | 14.75 |                   |                |

|                     |                  |               |          |         |         |       |                                 |                      |
|---------------------|------------------|---------------|----------|---------|---------|-------|---------------------------------|----------------------|
| <b>m.5221T&gt;C</b> | Missense variant | <i>MT-ND2</i> | MODERATE | p.L251P | cTa/cCa | 11.25 |                                 |                      |
| <b>m.5270C&gt;G</b> | Missense variant | <i>MT-ND2</i> | MODERATE | p.I267M | atC/atG | 16.67 |                                 |                      |
| <b>m.5300C&gt;G</b> | Missense variant | <i>MT-ND2</i> | MODERATE | p.I277M | atC/atG | 16.85 |                                 |                      |
| <b>m.5390A&gt;C</b> | Missense variant | <i>MT-ND2</i> | MODERATE | p.M307I | atA/atC | 12.05 |                                 |                      |
| <b>m.5420T&gt;G</b> | Missense variant | <i>MT-ND2</i> | MODERATE | p.F317L | ttT/ttG | 12.5  |                                 |                      |
| <b>m.5909C&gt;G</b> | Missense variant | <i>MT-CO1</i> | MODERATE | p.F2L   | ttC/ttG | 12.59 |                                 |                      |
| <b>m.6024C&gt;A</b> | Missense variant | <i>MT-CO1</i> | MODERATE | p.L41M  | Ctg/Atg | 58.47 |                                 |                      |
| <b>m.6040A&gt;C</b> | Missense variant | <i>MT-CO1</i> | MODERATE | p.N46T  | aAc/aCc | 10    |                                 |                      |
| <b>m.6054G&gt;A</b> | Missense variant | <i>MT-CO1</i> | MODERATE | p.D51N  | Gac/Aac | 15.38 |                                 |                      |
| <b>m.6097T&gt;G</b> | Stop-gained      | <i>MT-CO1</i> | HIGH     | p.M65X  | aTa/aGa | 10.53 |                                 |                      |
| <b>m.6115T&gt;G</b> | Stop-gained      | <i>MT-CO1</i> | HIGH     | p.M71X  | aTa/aGa | 12.5  |                                 |                      |
| <b>m.6189C&gt;A</b> | Missense variant | <i>MT-CO1</i> | MODERATE | p.R96S  | Cgc/Agc | 18    |                                 |                      |
| <b>m.6243G&gt;T</b> | Missense variant | <i>MT-CO1</i> | MODERATE | p.A114S | Gca/Tca | 10.64 |                                 |                      |
| <b>m.6273A&gt;C</b> | Missense variant | <i>MT-CO1</i> | MODERATE | p.T124P | Aca/Cca | 10.53 |                                 |                      |
| <b>m.6456G&gt;C</b> | Missense variant | <i>MT-CO1</i> | MODERATE | p.V185L | Gtc/Ctc | 12.5  |                                 |                      |
| <b>m.6474A&gt;C</b> | Missense variant | <i>MT-CO1</i> | MODERATE | p.T191P | Aca/Cca | 28.57 |                                 |                      |
| <b>m.6535C&gt;A</b> | Missense variant | <i>MT-CO1</i> | MODERATE | p.T211K | aCa/aAa | 11.43 |                                 |                      |
| <b>m.6568C&gt;A</b> | Missense variant | <i>MT-CO1</i> | MODERATE | p.P222H | cCc/cAc | 11.76 |                                 |                      |
| <b>m.6656C&gt;G</b> | Missense variant | <i>MT-CO1</i> | MODERATE | p.F251L | ttC/ttG | 11.7  |                                 |                      |
| <b>m.6672A&gt;T</b> | Missense variant | <i>MT-CO1</i> | MODERATE | p.I257F | Att/Ttt | 11.36 |                                 |                      |
| <b>m.6693A&gt;G</b> | Missense variant | <i>MT-CO1</i> | MODERATE | p.K264E | Aaa/Gaa | 10.5  |                                 |                      |
| <b>m.6737A&gt;C</b> | Missense variant | <i>MT-CO1</i> | MODERATE | p.M278I | atA/atC | 12    |                                 |                      |
| <b>m.6768G&gt;T</b> | Missense variant | <i>MT-CO1</i> | MODERATE | p.A289S | Gca/Tca | 12.08 |                                 |                      |
| <b>m.6783A&gt;T</b> | Missense variant | <i>MT-CO1</i> | MODERATE | p.T294S | Aca/Tca | 12.07 |                                 |                      |
| <b>m.6797C&gt;G</b> | Missense variant | <i>MT-CO1</i> | MODERATE | p.D298E | gaC/gaG | 13.33 |                                 |                      |
| <b>m.6828A&gt;G</b> | Missense variant | <i>MT-CO1</i> | MODERATE | p.T309A | Acc/Gcc | 11.11 |                                 |                      |
| <b>m.6887C&gt;G</b> | Missense variant | <i>MT-CO1</i> | MODERATE | p.H328Q | caC/caG | 19.23 |                                 |                      |
| <b>m.6976T&gt;A</b> | Stop-gained      | <i>MT-CO1</i> | HIGH     | p.L358X | tTa/tAa | 12.12 | COSM1331631<br>&<br>COSM1331632 | Ovary tumor          |
| <b>m.7314A&gt;C</b> | Missense variant | <i>MT-CO1</i> | MODERATE | p.M471L | Atg/Ctg | 11.54 |                                 |                      |
| <b>m.7325A&gt;C</b> | Missense variant | <i>MT-CO1</i> | MODERATE | p.E474D | gaA/gaC | 16.26 |                                 |                      |
| <b>m.7331C&gt;G</b> | Missense variant | <i>MT-CO1</i> | MODERATE | p.F476L | ttC/ttG | 10.98 |                                 |                      |
| <b>m.7385A&gt;T</b> | Missense variant | <i>MT-CO1</i> | MODERATE | p.W494C | tgA/tgT | 12.12 |                                 |                      |
| <b>m.7657T&gt;A</b> | Missense variant | <i>MT-CO2</i> | MODERATE | p.H24Q  | caT/caA | 14.49 |                                 |                      |
| <b>m.7667C&gt;A</b> | Missense variant | <i>MT-CO2</i> | MODERATE | p.L28I  | Ctc/Atc | 34.62 |                                 |                      |
| <b>m.7695T&gt;A</b> | Missense variant | <i>MT-CO2</i> | MODERATE | p.L37Q  | cTa/cAa | 12.5  |                                 |                      |
| <b>m.7784A&gt;C</b> | Missense variant | <i>MT-CO2</i> | MODERATE | p.I67L  | Atc/Ctc | 18.25 |                                 |                      |
| <b>m.7814G&gt;T</b> | Missense variant | <i>MT-CO2</i> | MODERATE | p.A77S  | Gcc/Tcc | 10.58 | COSM1155680                     | Endometrium<br>tumor |
| <b>m.7823T&gt;A</b> | Missense variant | <i>MT-CO2</i> | MODERATE | p.S80T  | Tcc/Acc | 12.5  |                                 |                      |
| <b>m.7842T&gt;C</b> | Missense variant | <i>MT-CO2</i> | MODERATE | p.M86T  | aTa/aCa | 13.71 |                                 |                      |

|                     |                  |                |          |         |         |       |                                 |                      |
|---------------------|------------------|----------------|----------|---------|---------|-------|---------------------------------|----------------------|
| <b>m.7877A&gt;T</b> | Stop-gained      | <i>MT-CO2</i>  | HIGH     | p.K98X  | Aaa/Taa | 15.79 |                                 |                      |
| <b>m.7909C&gt;G</b> | Stop-gained      | <i>MT-CO2</i>  | HIGH     | p.Y108X | taC/taG | 11.21 |                                 |                      |
| <b>m.7936C&gt;G</b> | Missense variant | <i>MT-CO2</i>  | MODERATE | p.I117M | atC/atG | 14.06 |                                 |                      |
| <b>m.7939C&gt;G</b> | Missense variant | <i>MT-CO2</i>  | MODERATE | p.F118L | ttC/ttG | 13.51 |                                 |                      |
| <b>m.7985C&gt;G</b> | Missense variant | <i>MT-CO2</i>  | MODERATE | p.R134G | Cga/Gga | 14.02 |                                 |                      |
| <b>m.8022T&gt;G</b> | Missense variant | <i>MT-CO2</i>  | MODERATE | p.I146S | aTt/aGt | 28.4  |                                 |                      |
| <b>m.8066C&gt;A</b> | Missense variant | <i>MT-CO2</i>  | MODERATE | p.H161N | Cac/Aac | 18.94 |                                 |                      |
| <b>m.8151C&gt;A</b> | Missense variant | <i>MT-CO2</i>  | MODERATE | p.P189Q | cCg/cAg | 20    |                                 |                      |
| <b>m.8247T&gt;C</b> | Missense variant | <i>MT-CO2</i>  | MODERATE | p.M221T | aTa/aCa | 14.1  |                                 |                      |
| <b>m.8259T&gt;A</b> | Missense variant | <i>MT-CO2</i>  | MODERATE | p.F225Y | tTt/tAt | 11.18 |                                 |                      |
| <b>m.8400T&gt;G</b> | Stop-gained      | <i>MT-ATP8</i> | HIGH     | p.M12X  | aTa/aGa | 10.53 |                                 |                      |
| <b>m.8439A&gt;T</b> | Missense variant | <i>MT-ATP8</i> | MODERATE | p.Q25L  | cAa/cTa | 36.75 |                                 |                      |
| <b>m.8526A&gt;G</b> | Stop-gained      | <i>MT-ATP8</i> | HIGH     | p.K54X  | aAa/aGa | 15.08 |                                 |                      |
| <b>m.8570T&gt;C</b> | Missense variant | <i>MT-ATP6</i> | MODERATE | p.L15P  | cTa/cCa | 17.86 |                                 |                      |
| <b>m.8639T&gt;G</b> | Missense variant | <i>MT-ATP6</i> | MODERATE | p.I38S  | aTc/aGc | 12.84 |                                 |                      |
| <b>m.8725A&gt;T</b> | Missense variant | <i>MT-ATP6</i> | MODERATE | p.T67S  | Acc/Tcc | 11.76 |                                 |                      |
| <b>m.8783G&gt;A</b> | Missense variant | <i>MT-ATP6</i> | MODERATE | p.G86E  | gGa/gAa | 12.13 |                                 |                      |
| <b>m.8836A&gt;T</b> | Missense variant | <i>MT-ATP6</i> | MODERATE | p.M104L | Atg/Ttg | 11.3  |                                 |                      |
| <b>m.8860G&gt;A</b> | Missense variant | <i>MT-ATP6</i> | MODERATE | p.A112T | Gca/Aca | 15.33 |                                 |                      |
| <b>m.8864T&gt;G</b> | Missense variant | <i>MT-ATP6</i> | MODERATE | p.V113G | gTg/gGg | 12.26 |                                 |                      |
| <b>m.8887A&gt;G</b> | Missense variant | <i>MT-ATP6</i> | MODERATE | p.I121V | Att/Gtt | 10.42 |                                 |                      |
| <b>m.8965A&gt;C</b> | Missense variant | <i>MT-ATP6</i> | MODERATE | p.I147L | Atc/Ctc | 23.08 |                                 |                      |
| <b>m.9252T&gt;G</b> | Missense variant | <i>MT-CO3</i>  | MODERATE | p.W16G  | Tga/Gga | 10.2  |                                 |                      |
| <b>m.9294G&gt;A</b> | Missense variant | <i>MT-CO3</i>  | MODERATE | p.G30S  | Ggc/Agc | 25.26 | COSM1155700<br>&<br>COSM1155701 | Endometrium<br>tumor |
| <b>m.9387G&gt;C</b> | Missense variant | <i>MT-CO3</i>  | MODERATE | p.V61L  | Gta/Cta | 16.33 |                                 |                      |
| <b>m.9447T&gt;G</b> | Missense variant | <i>MT-CO3</i>  | MODERATE | p.Y81D  | Tac/Gac | 10.95 |                                 |                      |
| <b>m.9475A&gt;G</b> | Missense variant | <i>MT-CO3</i>  | MODERATE | p.E90G  | gAa/gGa | 10.71 |                                 |                      |
| <b>m.9512C&gt;G</b> | Stop-gained      | <i>MT-CO3</i>  | HIGH     | p.Y102X | taC/taG | 20    |                                 |                      |
| <b>m.9583C&gt;A</b> | Missense variant | <i>MT-CO3</i>  | MODERATE | p.P126H | cCc/cAc | 10    |                                 |                      |
| <b>m.9631T&gt;A</b> | Missense variant | <i>MT-CO3</i>  | MODERATE | p.V142E | gTa/gAa | 30.86 |                                 |                      |
| <b>m.9646C&gt;G</b> | Missense variant | <i>MT-CO3</i>  | MODERATE | p.A147G | gCt/gGt | 30.95 |                                 |                      |
| <b>m.9763T&gt;C</b> | Missense variant | <i>MT-CO3</i>  | MODERATE | p.F186S | tTc/tCc | 17.95 |                                 |                      |
| <b>m.9770T&gt;G</b> | Missense variant | <i>MT-CO3</i>  | MODERATE | p.I188M | atT/atG | 12.87 |                                 |                      |
| <b>m.9785C&gt;G</b> | Stop-gained      | <i>MT-CO3</i>  | HIGH     | p.Y193X | taC/taG | 16.67 |                                 |                      |
| <b>m.9800T&gt;A</b> | Missense variant | <i>MT-CO3</i>  | MODERATE | p.F198L | ttT/ttA | 17.69 |                                 |                      |
| <b>m.9865T&gt;G</b> | Missense variant | <i>MT-CO3</i>  | MODERATE | p.I220S | aTc/aGc | 11.86 |                                 |                      |
| <b>m.9899T&gt;G</b> | Missense variant | <i>MT-CO3</i>  | MODERATE | p.H231Q | caT/caG | 13.14 | rs41345446                      |                      |
| <b>m.9937T&gt;C</b> | Missense variant | <i>MT-CO3</i>  | MODERATE | p.F244S | tTt/tCt | 11.11 |                                 |                      |
| <b>m.9946T&gt;G</b> | Missense variant | <i>MT-CO3</i>  | MODERATE | p.V247G | gTg/gGg | 10.23 |                                 |                      |

|                      |                  |                |          |         |         |       |                                   |
|----------------------|------------------|----------------|----------|---------|---------|-------|-----------------------------------|
| <b>m.9952G&gt;C</b>  | Missense variant | <i>MT-CO3</i>  | MODERATE | p.W249S | tGa/tCa | 16.67 |                                   |
| <b>m.10086A&gt;C</b> | Missense variant | <i>MT-ND3</i>  | MODERATE | p.N10H  | Aac/Cac | 16.67 | rs28358274                        |
| <b>m.10096T&gt;C</b> | Missense variant | <i>MT-ND3</i>  | MODERATE | p.L13P  | cTa/cCa | 10.53 |                                   |
| <b>m.10111T&gt;A</b> | Missense variant | <i>MT-ND3</i>  | MODERATE | p.M18K  | aTa/aAa | 37.36 |                                   |
| <b>m.10115T&gt;A</b> | Missense variant | <i>MT-ND3</i>  | MODERATE | p.I19M  | atT/atA | 11.76 |                                   |
| <b>m.10165C&gt;G</b> | Missense variant | <i>MT-ND3</i>  | MODERATE | p.P36R  | cCt/cGt | 12    |                                   |
| <b>m.10203G&gt;C</b> | Missense variant | <i>MT-ND3</i>  | MODERATE | p.V49L  | Gtc/Ctc | 14.74 |                                   |
| <b>m.10239A&gt;C</b> | Missense variant | <i>MT-ND3</i>  | MODERATE | p.T61P  | Acc/Ccc | 16.67 |                                   |
| <b>m.10399C&gt;T</b> | Missense variant | <i>MT-ND3</i>  | MODERATE | p.T114I | aCc/aTc | 12.5  |                                   |
| <b>m.10401G&gt;A</b> | Missense variant | <i>MT-ND3</i>  | MODERATE | p.E115K | Gaa/Aaa | 11.11 | rs28719882                        |
| <b>m.10518C&gt;G</b> | Missense variant | <i>MT-ND4L</i> | MODERATE | p.L17V  | Cta/Gta | 10    |                                   |
| <b>m.10536C&gt;G</b> | Missense variant | <i>MT-ND4L</i> | MODERATE | p.R23G  | Cgc/Ggc | 12.36 |                                   |
| <b>m.10593A&gt;T</b> | Missense variant | <i>MT-ND4L</i> | MODERATE | p.I42F  | Att/Ttt | 10.34 |                                   |
| <b>m.10640T&gt;G</b> | Missense variant | <i>MT-ND4L</i> | MODERATE | p.N57K  | aaT/aaG | 45.87 | rs386419955                       |
| <b>m.10676C&gt;G</b> | Missense variant | <i>MT-ND4L</i> | MODERATE | p.C69W  | tgC/tgG | 33.33 |                                   |
| <b>m.10711T&gt;A</b> | Missense variant | <i>MT-ND4L</i> | MODERATE | p.I81N  | aTc/aAc | 35.01 |                                   |
| <b>m.10774C&gt;G</b> | Missense variant | <i>MT-ND4</i>  | MODERATE | p.I5M   | atC/atG | 14.29 |                                   |
| <b>m.10790T&gt;G</b> | Missense variant | <i>MT-ND4</i>  | MODERATE | p.L11V  | Tta/Gta | 11.11 |                                   |
| <b>m.10829T&gt;G</b> | Missense variant | <i>MT-ND4</i>  | MODERATE | p.W24G  | Tga/Gga | 10.71 |                                   |
| <b>m.10885T&gt;A</b> | Missense variant | <i>MT-ND4</i>  | MODERATE | p.F42L  | ttT/ttA | 18.18 |                                   |
| <b>m.10895A&gt;T</b> | Missense variant | <i>MT-ND4</i>  | MODERATE | p.N46Y  | Aac/Tac | 13.33 |                                   |
| <b>m.10928T&gt;G</b> | Missense variant | <i>MT-ND4</i>  | MODERATE | p.S57A  | Tcc/Gcc | 19.62 |                                   |
| <b>m.11019A&gt;C</b> | Missense variant | <i>MT-ND4</i>  | MODERATE | p.E87A  | gAa/gCa | 15.22 |                                   |
| <b>m.11021C&gt;A</b> | Missense variant | <i>MT-ND4</i>  | MODERATE | p.P88T  | Cca/Aca | 10    |                                   |
| <b>m.11069A&gt;T</b> | Missense variant | <i>MT-ND4</i>  | MODERATE | p.I104F | Atc/Ttc | 12.5  |                                   |
| <b>m.11140C&gt;G</b> | Missense variant | <i>MT-ND4</i>  | MODERATE | p.I127M | atC/atG | 12.42 |                                   |
| <b>m.11145C&gt;T</b> | Missense variant | <i>MT-ND4</i>  | MODERATE | p.T129I | aCc/aTc | 13.89 |                                   |
| <b>m.11183C&gt;T</b> | Missense variant | <i>MT-ND4</i>  | MODERATE | p.R142C | Cgc/Tgc | 17.39 |                                   |
| <b>m.11322A&gt;C</b> | Missense variant | <i>MT-ND4</i>  | MODERATE | p.N188T | aAc/aCc | 11.36 |                                   |
| <b>m.11330G&gt;C</b> | Missense variant | <i>MT-ND4</i>  | MODERATE | p.A191P | Gcc/Ccc | 17.9  |                                   |
| <b>m.11423G&gt;T</b> | Stop-gained      | <i>MT-ND4</i>  | HIGH     | p.E222X | Gaa/Taa | 11.11 |                                   |
| <b>m.11445T&gt;G</b> | Stop-gained      | <i>MT-ND4</i>  | HIGH     | p.M229X | aTa/aGa | 10.86 |                                   |
| <b>m.11514C&gt;T</b> | Missense variant | <i>MT-ND4</i>  | MODERATE | p.P252L | cCc/cTc | 12.68 |                                   |
| <b>m.11675C&gt;T</b> | Missense variant | <i>MT-ND4</i>  | MODERATE | p.P306S | Ccc/Tcc | 12.75 |                                   |
| <b>m.11700T&gt;A</b> | Missense variant | <i>MT-ND4</i>  | MODERATE | p.I314N | aTt/aAt | 12    |                                   |
| <b>m.11751A&gt;T</b> | Missense variant | <i>MT-ND4</i>  | MODERATE | p.N331I | aAc/aTc | 11.76 |                                   |
| <b>m.11765C&gt;T</b> | Missense variant | <i>MT-ND4</i>  | MODERATE | p.R336C | Cgc/Tgc | 13.33 |                                   |
| <b>m.11777C&gt;G</b> | Missense variant | <i>MT-ND4</i>  | MODERATE | p.R340G | Cgc/Ggc | 17.39 | rs28384199                        |
| <b>m.11778G&gt;A</b> | Missense variant | <i>MT-ND4</i>  | MODERATE | p.R340H | cGc/cAc | 14.29 | rs199476112                       |
|                      |                  |                |          |         |         |       | Leigh syndrome                    |
|                      |                  |                |          |         |         |       | Lebers optic atrophy; MIM: 516003 |



|                      |                  |               |          |         |         |       |             |            |
|----------------------|------------------|---------------|----------|---------|---------|-------|-------------|------------|
| <b>m.11874C&gt;G</b> | Missense variant | <i>MT-ND4</i> | MODERATE | p.T372S | aCt/aGt | 10    |             |            |
| <b>m.11924T&gt;C</b> | Missense variant | <i>MT-ND4</i> | MODERATE | p.S389P | Tca/Cca | 33.33 |             |            |
| <b>m.12122A&gt;C</b> | Missense variant | <i>MT-ND4</i> | MODERATE | p.T455P | Acc/Ccc | 18.18 |             |            |
| <b>m.12347A&gt;C</b> | Missense variant | <i>MT-ND5</i> | MODERATE | p.H4P   | cAc/cCc | 15.22 |             |            |
| <b>m.12373A&gt;T</b> | Missense variant | <i>MT-ND5</i> | MODERATE | p.T13S  | Act/Tct | 24.78 |             |            |
| <b>m.12467T&gt;G</b> | Missense variant | <i>MT-ND5</i> | MODERATE | p.F44C  | tTt/tGt | 10.34 |             |            |
| <b>m.12499A&gt;T</b> | Missense variant | <i>MT-ND5</i> | MODERATE | p.M55L  | Atg/Ttg | 16.86 |             |            |
| <b>m.12523A&gt;G</b> | Missense variant | <i>MT-ND5</i> | MODERATE | p.I63V  | Atc/Gtc | 41.31 |             |            |
| <b>m.12569T&gt;A</b> | Missense variant | <i>MT-ND5</i> | MODERATE | p.L78Q  | cTa/cAa | 17.77 | COSM1155523 | Skin tumor |
| <b>m.12763G&gt;T</b> | Missense variant | <i>MT-ND5</i> | MODERATE | p.G143C | Ggc/Tgc | 15.79 |             |            |
| <b>m.12812A&gt;C</b> | Missense variant | <i>MT-ND5</i> | MODERATE | p.Y159S | tAc/tCc | 10.43 |             |            |
| <b>m.12841A&gt;G</b> | Missense variant | <i>MT-ND5</i> | MODERATE | p.I169V | Att/Gtt | 12.11 |             |            |
| <b>m.12884T&gt;C</b> | Missense variant | <i>MT-ND5</i> | MODERATE | p.I183T | aTc/aCc | 14.07 |             |            |
| <b>m.12951C&gt;G</b> | Missense variant | <i>MT-ND5</i> | MODERATE | p.N205K | aaC/aaG | 11.56 |             |            |
| <b>m.12968C&gt;G</b> | Missense variant | <i>MT-ND5</i> | MODERATE | p.T211S | aCc/aGc | 22.54 |             |            |
| <b>m.12986T&gt;A</b> | Missense variant | <i>MT-ND5</i> | MODERATE | p.L217H | cTc/cAc | 15.62 |             |            |
| <b>m.13005A&gt;T</b> | Missense variant | <i>MT-ND5</i> | MODERATE | p.K223N | aaA/aaT | 12    |             |            |
| <b>m.13117A&gt;C</b> | Missense variant | <i>MT-ND5</i> | MODERATE | p.I261L | Atc/Ctc | 15    |             |            |
| <b>m.13142A&gt;T</b> | Missense variant | <i>MT-ND5</i> | MODERATE | p.N269I | aAt/aTt | 16.67 |             |            |
| <b>m.13162C&gt;G</b> | Missense variant | <i>MT-ND5</i> | MODERATE | p.L276V | Cta/Gta | 11.76 |             |            |
| <b>m.13186A&gt;T</b> | Missense variant | <i>MT-ND5</i> | MODERATE | p.T284S | Acc/Tcc | 12.44 |             |            |
| <b>m.13198G&gt;C</b> | Missense variant | <i>MT-ND5</i> | MODERATE | p.A288P | Gca/Cca | 14.43 |             |            |
| <b>m.13293C&gt;G</b> | Missense variant | <i>MT-ND5</i> | MODERATE | p.I319M | atC/atG | 10.17 |             |            |
| <b>m.13343A&gt;G</b> | Stop-gained      | <i>MT-ND5</i> | HIGH     | p.K336X | aAa/aGa | 16    |             |            |
| <b>m.13350A&gt;C</b> | Missense variant | <i>MT-ND5</i> | MODERATE | p.M338I | atA/atC | 13.04 |             |            |
| <b>m.13363T&gt;A</b> | Missense variant | <i>MT-ND5</i> | MODERATE | p.S343T | Tcc/Acc | 10.42 |             |            |
| <b>m.13391A&gt;G</b> | Missense variant | <i>MT-ND5</i> | MODERATE | p.N352S | aAt/aGt | 11.76 |             |            |
| <b>m.13485A&gt;T</b> | Missense variant | <i>MT-ND5</i> | MODERATE | p.M383I | atA/atT | 11.22 | rs28359176  |            |
| <b>m.13495A&gt;C</b> | Missense variant | <i>MT-ND5</i> | MODERATE | p.T387P | Aca/Cca | 29.5  |             |            |
| <b>m.13510A&gt;C</b> | Missense variant | <i>MT-ND5</i> | MODERATE | p.K392Q | Aaa/Caa | 10.34 |             |            |
| <b>m.13511A&gt;G</b> | Stop-gained      | <i>MT-ND5</i> | HIGH     | p.K392X | aAa/aGa | 13.99 |             |            |
| <b>m.13556G&gt;C</b> | Missense variant | <i>MT-ND5</i> | MODERATE | p.W407S | tGa/tCa | 10.47 | COSM1720929 |            |
| <b>m.13579G&gt;T</b> | Missense variant | <i>MT-ND5</i> | MODERATE | p.A415S | Gct/Tct | 11.5  |             |            |
| <b>m.13726G&gt;C</b> | Missense variant | <i>MT-ND5</i> | MODERATE | p.A464P | Gca/Cca | 11.67 |             |            |
| <b>m.13765C&gt;G</b> | Missense variant | <i>MT-ND5</i> | MODERATE | p.P477A | Ccc/Gcc | 11.13 |             |            |
| <b>m.13808T&gt;A</b> | Missense variant | <i>MT-ND5</i> | MODERATE | p.L491H | cTc/cAc | 10.42 |             |            |
| <b>m.13823T&gt;C</b> | Missense variant | <i>MT-ND5</i> | MODERATE | p.L496P | cTa/cCa | 10.88 |             |            |
| <b>m.14211C&gt;A</b> | Missense variant | <i>MT-ND6</i> | MODERATE | p.V155F | Gtt/Ttt | 11.76 |             |            |
| <b>m.14256T&gt;A</b> | Missense variant | <i>MT-ND6</i> | MODERATE | p.I140F | Att/Ttt | 12    |             |            |
| <b>m.14270A&gt;G</b> | Missense variant | <i>MT-ND6</i> | MODERATE | p.I135T | aTt/aCt | 33.52 |             |            |

|                      |                  |               |          |         |         |       |                                 |              |
|----------------------|------------------|---------------|----------|---------|---------|-------|---------------------------------|--------------|
| <b>m.14363A&gt;T</b> | Missense variant | <i>MT-ND6</i> | MODERATE | p.L104Q | cTg/cAg | 14.78 |                                 |              |
| <b>m.14427C&gt;A</b> | Missense variant | <i>MT-ND6</i> | MODERATE | p.G83W  | Ggg/Tgg | 38.19 |                                 |              |
| <b>m.14478C&gt;A</b> | Missense variant | <i>MT-ND6</i> | MODERATE | p.V66F  | Gtc/Ttc | 10    |                                 |              |
| <b>m.14556A&gt;T</b> | Missense variant | <i>MT-ND6</i> | MODERATE | p.C40S  | Tgt/Agt | 15.38 |                                 |              |
| <b>m.14777A&gt;C</b> | Missense variant | <i>MT-CYB</i> | MODERATE | p.M11L  | Ata/Cta | 17.43 |                                 |              |
| <b>m.14790A&gt;G</b> | Missense variant | <i>MT-CYB</i> | MODERATE | p.N15S  | aAc/aGc | 23.08 |                                 |              |
| <b>m.14843T&gt;C</b> | Missense variant | <i>MT-CYB</i> | MODERATE | p.F33L  | Ttc/Ctc | 10.7  |                                 |              |
| <b>m.14847G&gt;T</b> | Missense variant | <i>MT-CYB</i> | MODERATE | p.G34V  | gGc/gTc | 18.61 | COSM1138282<br>&<br>COSM1138283 | Kidney tumor |
| <b>m.14883C&gt;G</b> | Missense variant | <i>MT-CYB</i> | MODERATE | p.T46S  | aCc/aGc | 10    |                                 |              |
| <b>m.14927A&gt;G</b> | Missense variant | <i>MT-CYB</i> | MODERATE | p.T61A  | Acc/Gcc | 18.24 | rs201551481                     |              |
| <b>m.14990C&gt;G</b> | Missense variant | <i>MT-CYB</i> | MODERATE | p.L82V  | Ctt/Gtt | 14.72 |                                 |              |
| <b>m.15030T&gt;G</b> | Missense variant | <i>MT-CYB</i> | MODERATE | p.F95C  | tTc/tGc | 19.29 |                                 |              |
| <b>m.15078A&gt;G</b> | Missense variant | <i>MT-CYB</i> | MODERATE | p.E111G | gAa/gGa | 10.59 |                                 |              |
| <b>m.15097T&gt;G</b> | Missense variant | <i>MT-CYB</i> | MODERATE | p.I117M | atT/atG | 22.01 |                                 |              |
| <b>m.15108T&gt;C</b> | Missense variant | <i>MT-CYB</i> | MODERATE | p.L121P | cTt/cCt | 10.51 |                                 |              |
| <b>m.15129T&gt;G</b> | Missense variant | <i>MT-CYB</i> | MODERATE | p.F128C | tTc/tGc | 10.71 |                                 |              |
| <b>m.15200G&gt;T</b> | Missense variant | <i>MT-CYB</i> | MODERATE | p.A152S | Gcc/Tcc | 18.75 |                                 |              |
| <b>m.15240G&gt;C</b> | Missense variant | <i>MT-CYB</i> | MODERATE | p.W165S | tGa/tCa | 13.95 |                                 |              |
| <b>m.15255T&gt;G</b> | Missense variant | <i>MT-CYB</i> | MODERATE | p.V170G | gTa/gGa | 41.38 |                                 |              |
| <b>m.15402C&gt;G</b> | Missense variant | <i>MT-CYB</i> | MODERATE | p.T219S | aCc/aGc | 10.26 |                                 |              |
| <b>m.15462T&gt;G</b> | Missense variant | <i>MT-CYB</i> | MODERATE | p.L239W | tTa/tGa | 17.24 |                                 |              |
| <b>m.15502C&gt;G</b> | Missense variant | <i>MT-CYB</i> | MODERATE | p.D252E | gaC/gaG | 21.43 |                                 |              |
| <b>m.15545C&gt;A</b> | Missense variant | <i>MT-CYB</i> | MODERATE | p.H267N | Cac/Aac | 14.29 |                                 |              |
| <b>m.15645T&gt;G</b> | Missense variant | <i>MT-CYB</i> | MODERATE | p.I300S | aTc/aGc | 10.85 |                                 |              |
| <b>m.15653A&gt;C</b> | Missense variant | <i>MT-CYB</i> | MODERATE | p.M303L | Ata/Cta | 15.57 |                                 |              |
| <b>m.15659C&gt;T</b> | Missense variant | <i>MT-CYB</i> | MODERATE | p.P305S | Ccc/Tcc | 15.38 |                                 |              |

Supplementary table 17: Position of SNVs, their consequences, and heteroplasmy percentage in single myeloid cells from 3 AML patients.

| Substitution | Consequence      | Gene          | Impact   | Amino acid change | HET%  | Codons  | Existing variants | Phenotype data |
|--------------|------------------|---------------|----------|-------------------|-------|---------|-------------------|----------------|
| m.3397A>T    | Missense variant | <i>MT-ND1</i> | MODERATE | p.M31L            | 15.62 | Ata/Tta |                   |                |
| m.3524C>G    | Missense variant | <i>MT-ND1</i> | MODERATE | p.T73S            | 96.61 | aCc/aGc |                   |                |
| m.3574C>A    | Missense variant | <i>MT-ND1</i> | MODERATE | p.P90T            | 47.69 | Ccc/Acc |                   |                |
| m.3669A>C    | Missense variant | <i>MT-ND1</i> | MODERATE | p.W121C           | 20.59 | tgA/tgC |                   |                |
| m.3812A>C    | Missense variant | <i>MT-ND1</i> | MODERATE | p.Q169P           | 15.79 | cAa/cCa |                   |                |
| m.3820C>A    | Missense variant | <i>MT-ND1</i> | MODERATE | p.L172I           | 50    | Ctc/Atc |                   |                |
| m.3947A>T    | Missense variant | <i>MT-ND1</i> | MODERATE | p.E214V           | 27.12 | gAa/gTa |                   |                |
| m.3967G>T    | Missense variant | <i>MT-ND1</i> | MODERATE | p.A221S           | 15.79 | Gcc/Tcc |                   |                |
| m.4212A>T    | Missense variant | <i>MT-ND1</i> | MODERATE | p.M302I           | 13.46 | atA/atT |                   |                |
| m.4222T>A    | Missense variant | <i>MT-ND1</i> | MODERATE | p.S306T           | 59.32 | Tcc/Acc |                   |                |
| m.4227A>T    | Missense variant | <i>MT-ND1</i> | MODERATE | p.M307I           | 11.63 | atA/atT |                   |                |
| m.4509T>C    | Missense variant | <i>MT-ND2</i> | MODERATE | p.F14L            | 23.91 | Ttt/Ctt |                   |                |
| m.4516G>A    | Missense variant | <i>MT-ND2</i> | MODERATE | p.G16D            | 12.2  | gGc/gAc |                   |                |
| m.4578A>G    | Missense variant | <i>MT-ND2</i> | MODERATE | p.M37V            | 25    | Atg/Gtg |                   |                |
| m.4629G>A    | Missense variant | <i>MT-ND2</i> | MODERATE | p.E54K            | 76.97 | Gaa/Aaa |                   |                |
| m.4703T>G    | Missense variant | <i>MT-ND2</i> | MODERATE | p.N78K            | 93.87 | aaT/aaG |                   |                |
| m.4707C>A    | Missense variant | <i>MT-ND2</i> | MODERATE | p.L80I            | 16.28 | Ctc/Atc |                   |                |
| m.4719T>G    | Missense variant | <i>MT-ND2</i> | MODERATE | p.W84G            | 85.62 | Tga/Gga |                   |                |
| m.4808C>G    | Missense variant | <i>MT-ND2</i> | MODERATE | p.F113L           | 11.76 | ttC/ttG |                   |                |
| m.4813T>C    | Missense variant | <i>MT-ND2</i> | MODERATE | p.V115A           | 17.65 | gTc/gCc |                   |                |
| m.4886C>G    | Missense variant | <i>MT-ND2</i> | MODERATE | p.I139M           | 40    | atC/atG |                   |                |
| m.5925T>G    | Missense variant | <i>MT-CO1</i> | MODERATE | p.F8V             | 91.86 | Ttc/Gtc |                   |                |
| m.5927C>G    | Missense variant | <i>MT-CO1</i> | MODERATE | p.F8L             | 55.81 | ttC/ttG |                   |                |
| m.5939C>G    | Missense variant | <i>MT-CO1</i> | MODERATE | p.H12Q            | 48.78 | caC/caG |                   |                |
| m.5942A>C    | Missense variant | <i>MT-CO1</i> | MODERATE | p.K13N            | 10.26 | aaA/aaC |                   |                |
| m.5952A>G    | Missense variant | <i>MT-CO1</i> | MODERATE | p.T17A            | 11.76 | Aca/Gca | rs879232447       |                |
| m.6069G>T    | Missense variant | <i>MT-CO1</i> | MODERATE | p.V56F            | 12.9  | Gtt/Ttt |                   |                |
| m.6171C>G    | Missense variant | <i>MT-CO1</i> | MODERATE | p.P90A            | 12.12 | Ccc/Gcc |                   |                |
| m.6223C>T    | Missense variant | <i>MT-CO1</i> | MODERATE | p.P107L           | 31.03 | cCc/cTc |                   |                |
| m.6270G>C    | Missense variant | <i>MT-CO1</i> | MODERATE | p.G123R           | 11.02 | Gga/Cga |                   |                |
| m.6273A>G    | Missense variant | <i>MT-CO1</i> | MODERATE | p.T124A           | 59.52 | Aca/Gca |                   |                |
| m.6409T>C    | Missense variant | <i>MT-CO1</i> | MODERATE | p.I169T           | 21.21 | aTc/aCc |                   |                |
| m.6413T>G    | Missense variant | <i>MT-CO1</i> | MODERATE | p.N170K           | 23.91 | aaT/aaG |                   |                |
| m.6451T>G    | Missense variant | <i>MT-CO1</i> | MODERATE | p.L183R           | 12.5  | cTc/cGc |                   |                |
| m.6511C>G    | Missense variant | <i>MT-CO1</i> | MODERATE | p.A203G           | 12.9  | gCt/gGt |                   |                |
| m.6771C>T    | Missense variant | <i>MT-CO1</i> | MODERATE | p.H290Y           | 14.29 | Cac/Tac |                   |                |

|                     |                  |                |          |         |       |         |                                |              |
|---------------------|------------------|----------------|----------|---------|-------|---------|--------------------------------|--------------|
| <b>m.6797C&gt;A</b> | Missense variant | <i>MT-CO1</i>  | MODERATE | p.D298E | 12.2  | gaC/gaA |                                |              |
| <b>m.6801G&gt;T</b> | Missense variant | <i>MT-CO1</i>  | MODERATE | p.D300Y | 30.19 | Gac/Tac |                                |              |
| <b>m.6861G&gt;A</b> | Missense variant | <i>MT-CO1</i>  | MODERATE | p.V320M | 17.95 | Gta/Ata |                                |              |
| <b>m.6897A&gt;T</b> | Missense variant | <i>MT-CO1</i>  | MODERATE | p.M332L | 15.22 | Atg/Ttg |                                |              |
| <b>m.6915G&gt;C</b> | Missense variant | <i>MT-CO1</i>  | MODERATE | p.V338L | 15.38 | Gtg/Ctg |                                |              |
| <b>m.6990C&gt;G</b> | Missense variant | <i>MT-CO1</i>  | MODERATE | p.L363V | 61.36 | Cta/Gta |                                |              |
| <b>m.7005C&gt;T</b> | Missense variant | <i>MT-CO1</i>  | MODERATE | p.H368Y | 10.26 | Cac/Tac |                                |              |
| <b>m.7152A&gt;G</b> | Missense variant | <i>MT-CO1</i>  | MODERATE | p.M417V | 14.08 | Ata/Gta |                                |              |
| <b>m.7195T&gt;C</b> | Missense variant | <i>MT-CO1</i>  | MODERATE | p.L431P | 45    | cTc/cCc |                                |              |
| <b>m.7236G&gt;C</b> | Missense variant | <i>MT-CO1</i>  | MODERATE | p.D445H | 88.3  | Gat/Cat |                                |              |
| <b>m.7240C&gt;A</b> | Missense variant | <i>MT-CO1</i>  | MODERATE | p.A446E | 25.35 | gCa/gAa |                                |              |
| <b>m.7393G&gt;T</b> | Missense variant | <i>MT-CO1</i>  | MODERATE | p.G497V | 51.52 | gGa/gTa |                                |              |
| <b>m.7590C&gt;G</b> | Missense variant | <i>MT-CO2</i>  | MODERATE | p.A2G   | 47.83 | gCa/gGa |                                |              |
| <b>m.7653T&gt;C</b> | Missense variant | <i>MT-CO2</i>  | MODERATE | p.F23S  | 15.31 | tTt/tCt |                                |              |
| <b>m.7764A&gt;C</b> | Missense variant | <i>MT-CO2</i>  | MODERATE | p.E60A  | 76.09 | gAa/gCa |                                |              |
| <b>m.7787C&gt;A</b> | Missense variant | <i>MT-CO2</i>  | MODERATE | p.L68M  | 21.95 | Ctg/Atg |                                |              |
| <b>m.7813C&gt;G</b> | Missense variant | <i>MT-CO2</i>  | MODERATE | p.I76M  | 44.12 | atC/atG |                                |              |
| <b>m.7991C&gt;G</b> | Missense variant | <i>MT-CO2</i>  | MODERATE | p.L136V | 14.63 | Ctt/Gtt |                                |              |
| <b>m.8054C&gt;G</b> | Missense variant | <i>MT-CO2</i>  | MODERATE | p.Q157E | 10.42 | Caa/Gaa |                                |              |
| <b>m.8064T&gt;C</b> | Missense variant | <i>MT-CO2</i>  | MODERATE | p.L160S | 29.23 | tTg/tCg |                                |              |
| <b>m.8154G&gt;A</b> | Missense variant | <i>MT-CO2</i>  | MODERATE | p.G190E | 15.92 | gGg/gAg |                                |              |
| <b>m.8694A&gt;C</b> | Missense variant | <i>MT-ATP6</i> | MODERATE | p.Q56H  | 31.25 | caA/caC |                                |              |
| <b>m.8707C&gt;G</b> | Missense variant | <i>MT-ATP6</i> | MODERATE | p.H61D  | 12.24 | Cac/Gac |                                |              |
| <b>m.8708A&gt;C</b> | Missense variant | <i>MT-ATP6</i> | MODERATE | p.H61P  | 40    | cAc/cCc |                                |              |
| <b>m.8711A&gt;C</b> | Missense variant | <i>MT-ATP6</i> | MODERATE | p.N62T  | 23.44 | aAc/aCc |                                |              |
| <b>m.8794C&gt;G</b> | Missense variant | <i>MT-ATP6</i> | MODERATE | p.H90D  | 21.88 | Cac/Gac | COSM1138408<br>&<br>COSM488775 | Kidney tumor |
| <b>m.8795A&gt;T</b> | Missense variant | <i>MT-ATP6</i> | MODERATE | p.H90L  | 37.78 | cAc/cTc |                                |              |
| <b>m.8836A&gt;G</b> | Missense variant | <i>MT-ATP6</i> | MODERATE | p.M104V | 11.36 | Atg/Gtg |                                |              |
| <b>m.8965A&gt;T</b> | Missense variant | <i>MT-ATP6</i> | MODERATE | p.I147F | 86.67 | Atc/Ttc |                                |              |
| <b>m.9140C&gt;T</b> | Missense variant | <i>MT-ATP6</i> | MODERATE | p.A205V | 68    | gCt/gTt | rs878972895                    |              |
| <b>m.9194A&gt;G</b> | Missense variant | <i>MT-ATP6</i> | MODERATE | p.H223R | 19.35 | cAc/cGc |                                |              |
| <b>m.9234A&gt;G</b> | Missense variant | <i>MT-CO3</i>  | MODERATE | p.M10V  | 10.26 | Ata/Gta |                                |              |
| <b>m.9277C&gt;A</b> | Missense variant | <i>MT-CO3</i>  | MODERATE | p.A24D  | 19.44 | gCc/gAc |                                |              |
| <b>m.9314C&gt;A</b> | Missense variant | <i>MT-CO3</i>  | MODERATE | p.H36Q  | 15.62 | caC/caA |                                |              |
| <b>m.9402A&gt;G</b> | Missense variant | <i>MT-CO3</i>  | MODERATE | p.T66A  | 65.62 | Aca/Gca |                                |              |
| <b>m.9409A&gt;C</b> | Missense variant | <i>MT-CO3</i>  | MODERATE | p.Q68P  | 22.22 | cAa/cCa |                                |              |
| <b>m.9414C&gt;A</b> | Missense variant | <i>MT-CO3</i>  | MODERATE | p.H70N  | 13.08 | Cac/Aac |                                |              |
| <b>m.9515C&gt;A</b> | Missense variant | <i>MT-CO3</i>  | MODERATE | p.H103Q | 45.71 | caC/caA |                                |              |
| <b>m.9607C&gt;T</b> | Missense variant | <i>MT-CO3</i>  | MODERATE | p.T134M | 47.73 | aCa/aTa |                                |              |

|                      |                  |                |          |         |       |         |                                 |                       |
|----------------------|------------------|----------------|----------|---------|-------|---------|---------------------------------|-----------------------|
| <b>m.9777G&gt;A</b>  | Missense variant | <i>MT-CO3</i>  | MODERATE | p.G191S | 24.59 | Ggc/Agc |                                 |                       |
| <b>m.9925G&gt;C</b>  | Missense variant | <i>MT-CO3</i>  | MODERATE | p.W240S | 47.62 | tGa/tCa |                                 |                       |
| <b>m.9972A&gt;G</b>  | Missense variant | <i>MT-CO3</i>  | MODERATE | p.I256V | 13.86 | Atc/Gtc |                                 |                       |
| <b>m.10173T&gt;C</b> | Missense variant | <i>MT-ND3</i>  | MODERATE | p.C39R  | 44    | Tgc/Cgc |                                 |                       |
| <b>m.10198C&gt;G</b> | Missense variant | <i>MT-ND3</i>  | MODERATE | p.A47G  | 10.64 | gCc/gGc |                                 |                       |
| <b>m.10206C&gt;T</b> | Missense variant | <i>MT-ND3</i>  | MODERATE | p.P50S  | 16.22 | Cct/Tct |                                 |                       |
| <b>m.10213C&gt;G</b> | Missense variant | <i>MT-ND3</i>  | MODERATE | p.S52C  | 15.07 | tCc/tGc |                                 |                       |
| <b>m.10284C&gt;T</b> | Missense variant | <i>MT-ND3</i>  | MODERATE | p.P76S  | 35.48 | Cca/Tea |                                 |                       |
| <b>m.10483A&gt;C</b> | Missense variant | <i>MT-ND4L</i> | MODERATE | p.Y5S   | 45.16 | tAc/tCc |                                 |                       |
| <b>m.10619C&gt;G</b> | Missense variant | <i>MT-ND4L</i> | MODERATE | p.N50K  | 19.35 | aaC/aaG |                                 |                       |
| <b>m.10621C&gt;T</b> | Missense variant | <i>MT-ND4L</i> | MODERATE | p.T51I  | 20    | aCc/aTc |                                 |                       |
| <b>m.10635G&gt;T</b> | Missense variant | <i>MT-ND4L</i> | MODERATE | p.A56S  | 42.42 | Gcc/Tcc |                                 |                       |
| <b>m.10665T&gt;G</b> | Missense variant | <i>MT-ND4L</i> | MODERATE | p.F66V  | 35.56 | Ttt/Gtt |                                 |                       |
| <b>m.10718C&gt;G</b> | Missense variant | <i>MT-ND4L</i> | MODERATE | p.N83K  | 17.31 | aaC/aaG |                                 |                       |
| <b>m.10725G&gt;A</b> | Missense variant | <i>MT-ND4L</i> | MODERATE | p.G86S  | 21.82 | Ggc/Agc |                                 |                       |
| <b>m.10726G&gt;C</b> | Missense variant | <i>MT-ND4L</i> | MODERATE | p.G86A  | 32.73 | gGc/gCc |                                 |                       |
| <b>m.10776T&gt;A</b> | Missense variant | <i>MT-ND4</i>  | MODERATE | p.V6D   | 84.68 | gTc/gAc |                                 |                       |
| <b>m.10833T&gt;A</b> | Missense variant | <i>MT-ND4</i>  | MODERATE | p.I25N  | 14.63 | aTc/aAc |                                 |                       |
| <b>m.10899A&gt;G</b> | Missense variant | <i>MT-ND4</i>  | MODERATE | p.N47S  | 14.29 | aAc/aGc |                                 |                       |
| <b>m.11093G&gt;C</b> | Missense variant | <i>MT-ND4</i>  | MODERATE | p.A112P | 11.76 | Gcc/Ccc | COSM1155502                     | Endometrium tumor     |
| <b>m.11178C&gt;G</b> | Missense variant | <i>MT-ND4</i>  | MODERATE | p.P140R | 25    | cCa/cGa |                                 |                       |
| <b>m.11303A&gt;T</b> | Missense variant | <i>MT-ND4</i>  | MODERATE | p.T182S | 13.95 | Act/Tct |                                 |                       |
| <b>m.11364C&gt;G</b> | Missense variant | <i>MT-ND4</i>  | MODERATE | p.A202G | 28.12 | gCt/gGt |                                 |                       |
| <b>m.11427C&gt;A</b> | Missense variant | <i>MT-ND4</i>  | MODERATE | p.A223D | 12.9  | gCc/gAc |                                 |                       |
| <b>m.11433T&gt;G</b> | Missense variant | <i>MT-ND4</i>  | MODERATE | p.I225S | 16.67 | aTc/aGc |                                 |                       |
| <b>m.11442C&gt;G</b> | Missense variant | <i>MT-ND4</i>  | MODERATE | p.S228W | 54.17 | tCa/tGa |                                 |                       |
| <b>m.11498A&gt;T</b> | Missense variant | <i>MT-ND4</i>  | MODERATE | p.T247S | 13.89 | Aca/Tea |                                 |                       |
| <b>m.11526A&gt;T</b> | Missense variant | <i>MT-ND4</i>  | MODERATE | p.H256L | 23.81 | cAc/cTc |                                 |                       |
| <b>m.11594C&gt;G</b> | Missense variant | <i>MT-ND4</i>  | MODERATE | p.Q279E | 23.28 | Caa/Gaa |                                 |                       |
| <b>m.11617T&gt;A</b> | Missense variant | <i>MT-ND4</i>  | MODERATE | p.I286M | 38.1  | atT/atA |                                 |                       |
| <b>m.11632C&gt;A</b> | Missense variant | <i>MT-ND4</i>  | MODERATE | p.I291M | 15.56 | atC/atA |                                 |                       |
| <b>m.11687A&gt;C</b> | Missense variant | <i>MT-ND4</i>  | MODERATE | p.T310P | 11.36 | Acc/Ccc |                                 |                       |
| <b>m.11699A&gt;C</b> | Missense variant | <i>MT-ND4</i>  | MODERATE | p.I314L | 21.62 | Att/Ctt |                                 |                       |
| <b>m.11797A&gt;C</b> | Missense variant | <i>MT-ND4</i>  | MODERATE | p.Q346H | 32.91 | caA/caC |                                 |                       |
| <b>m.11813C&gt;T</b> | Missense variant | <i>MT-ND4</i>  | MODERATE | p.L352F | 12.9  | Ctc/Ttc |                                 |                       |
| <b>m.11893A&gt;T</b> | Missense variant | <i>MT-ND4</i>  | MODERATE | p.E378D | 36.84 | gaA/gaT |                                 |                       |
| <b>m.12077C&gt;T</b> | Missense variant | <i>MT-ND4</i>  | MODERATE | p.H440Y | 15.56 | Cac/Tac | COSM6716735<br>&<br>COSM6716736 | Large intestine tumor |
| <b>m.12389C&gt;T</b> | Missense variant | <i>MT-ND5</i>  | MODERATE | p.P18L  | 44.12 | cCc/cTc |                                 |                       |
| <b>m.12393C&gt;A</b> | Missense variant | <i>MT-ND5</i>  | MODERATE | p.I19M  | 78.95 | atC/atA |                                 |                       |

|                      |                  |               |          |         |       |         |             |                               |
|----------------------|------------------|---------------|----------|---------|-------|---------|-------------|-------------------------------|
| <b>m.12442G&gt;A</b> | Missense variant | <i>MT-ND5</i> | MODERATE | p.V36M  | 10.87 | Gta/Ata |             |                               |
| <b>m.12452T&gt;C</b> | Missense variant | <i>MT-ND5</i> | MODERATE | p.I39T  | 12.28 | aTt/aCt |             |                               |
| <b>m.12500T&gt;A</b> | Missense variant | <i>MT-ND5</i> | MODERATE | p.M55K  | 28.95 | aTg/aAg | COSM1155521 | Endometrium tumor             |
| <b>m.12534A&gt;C</b> | Missense variant | <i>MT-ND5</i> | MODERATE | p.W66C  | 46.94 | tgA/tgC |             |                               |
| <b>m.12548C&gt;A</b> | Missense variant | <i>MT-ND5</i> | MODERATE | p.T71N  | 58.54 | aCc/aAc |             |                               |
| <b>m.12643T&gt;C</b> | Missense variant | <i>MT-ND5</i> | MODERATE | p.F103L | 71.43 | Ttc/Ctc |             |                               |
| <b>m.12654A&gt;T</b> | Missense variant | <i>MT-ND5</i> | MODERATE | p.W106C | 21.62 | tgA/tgT | rs386829162 |                               |
| <b>m.12662A&gt;T</b> | Missense variant | <i>MT-ND5</i> | MODERATE | p.N109I | 82.15 | aAc/aTc |             |                               |
| <b>m.12788C&gt;A</b> | Missense variant | <i>MT-ND5</i> | MODERATE | p.S151Y | 11.43 | tCc/tAc |             |                               |
| <b>m.12808T&gt;C</b> | Missense variant | <i>MT-ND5</i> | MODERATE | p.W158R | 35.29 | Tga/Cga |             |                               |
| <b>m.12818G&gt;C</b> | Missense variant | <i>MT-ND5</i> | MODERATE | p.R161P | 39.02 | cGa/cCa |             |                               |
| <b>m.12821C&gt;A</b> | Missense variant | <i>MT-ND5</i> | MODERATE | p.A162E | 10.42 | gCa/gAa |             |                               |
| <b>m.12853C&gt;G</b> | Missense variant | <i>MT-ND5</i> | MODERATE | p.L173V | 24.24 | Cta/Gta |             |                               |
| <b>m.12854T&gt;G</b> | Missense variant | <i>MT-ND5</i> | MODERATE | p.L173R | 53.85 | cTa/cGa | COSM488735  | <a href="#">Kidney tumour</a> |
| <b>m.12933A&gt;T</b> | Missense variant | <i>MT-ND5</i> | MODERATE | p.Q199H | 58.79 | caA/caT |             |                               |
| <b>m.13204G&gt;T</b> | Missense variant | <i>MT-ND5</i> | MODERATE | p.V290F | 11.11 | Gtc/Ttc | COSM488743  | <a href="#">Kidney tumour</a> |
| <b>m.13297C&gt;G</b> | Missense variant | <i>MT-ND5</i> | MODERATE | p.Q321E | 10.42 | Caa/Gaa |             |                               |
| <b>m.13298A&gt;C</b> | Missense variant | <i>MT-ND5</i> | MODERATE | p.Q321P | 62.5  | cAa/cCa |             |                               |
| <b>m.13357A&gt;T</b> | Missense variant | <i>MT-ND5</i> | MODERATE | p.M341L | 20.07 | Atg/Ttg |             |                               |
| <b>m.13520T&gt;G</b> | Missense variant | <i>MT-ND5</i> | MODERATE | p.I395S | 80.18 | aTc/aGc |             |                               |
| <b>m.13546A&gt;C</b> | Missense variant | <i>MT-ND5</i> | MODERATE | p.T404P | 77.22 | Aca/Cca |             |                               |
| <b>m.13757C&gt;A</b> | Missense variant | <i>MT-ND5</i> | MODERATE | p.P474H | 24.24 | cCc/cAc |             |                               |
| <b>m.13769T&gt;C</b> | Missense variant | <i>MT-ND5</i> | MODERATE | p.F478S | 76.77 | tTc/tCc |             |                               |
| <b>m.13771C&gt;A</b> | Missense variant | <i>MT-ND5</i> | MODERATE | p.Q479K | 13.51 | Caa/Aaa |             |                               |
| <b>m.13937A&gt;T</b> | Missense variant | <i>MT-ND5</i> | MODERATE | p.H534L | 30.95 | cAc/cTc |             |                               |
| <b>m.14051C&gt;A</b> | Missense variant | <i>MT-ND5</i> | MODERATE | p.S572Y | 13.04 | tCc/tAc |             |                               |
| <b>m.14159C&gt;A</b> | Missense variant | <i>MT-ND6</i> | MODERATE | p.R172L | 27.08 | cGg/cTg |             |                               |
| <b>m.14178T&gt;C</b> | Missense variant | <i>MT-ND6</i> | MODERATE | p.I166V | 40.79 | Att/Gtt | rs28357671  |                               |
| <b>m.14238A&gt;G</b> | Missense variant | <i>MT-ND6</i> | MODERATE | p.Y146H | 18.75 | Tat/Cat |             |                               |
| <b>m.14292C&gt;G</b> | Missense variant | <i>MT-ND6</i> | MODERATE | p.E128Q | 10.45 | Gaa/Caa |             |                               |
| <b>m.14482C&gt;G</b> | Missense variant | <i>MT-ND6</i> | MODERATE | p.M64I  | 79.22 | atG/atC | rs199476108 |                               |
| <b>m.14656A&gt;C</b> | Missense variant | <i>MT-ND6</i> | MODERATE | p.F6L   | 48.72 | ttT/ttG |             |                               |
| <b>m.14782A&gt;C</b> | Missense variant | <i>MT-CYB</i> | MODERATE | p.K12N  | 42.11 | aaA/aaC |             |                               |
| <b>m.14889G&gt;A</b> | Missense variant | <i>MT-CYB</i> | MODERATE | p.G48E  | 10.26 | gGa/gAa |             |                               |
| <b>m.14901C&gt;A</b> | Missense variant | <i>MT-CYB</i> | MODERATE | p.A52D  | 26.67 | gCc/gAc |             |                               |
| <b>m.14907A&gt;G</b> | Missense variant | <i>MT-CYB</i> | MODERATE | p.H54R  | 14.75 | cAc/cGc |             |                               |
| <b>m.14915C&gt;G</b> | Missense variant | <i>MT-CYB</i> | MODERATE | p.P57A  | 54.76 | Cca/Gca |             |                               |
| <b>m.14928C&gt;G</b> | Missense variant | <i>MT-CYB</i> | MODERATE | p.T61S  | 36.96 | aCc/aGc |             |                               |
| <b>m.14999A&gt;T</b> | Missense variant | <i>MT-CYB</i> | MODERATE | p.N85Y  | 12.9  | Aat/Tat |             |                               |
| <b>m.15023T&gt;A</b> | Missense variant | <i>MT-CYB</i> | MODERATE | p.C93S  | 37.5  | Tgc/Agc |             |                               |

|                      |                        |               |          |         |       |         |
|----------------------|------------------------|---------------|----------|---------|-------|---------|
| <b>m.15185A&gt;T</b> | Missense variant       | <i>MT-CYB</i> | MODERATE | p.T147S | 71.43 | Aca/Tca |
| <b>m.15309T&gt;G</b> | Missense variant       | <i>MT-CYB</i> | MODERATE | p.I188S | 18.84 | aTt/aGt |
| <b>m.15617G&gt;T</b> | Missense variant       | <i>MT-CYB</i> | MODERATE | p.V291F | 41.3  | Gtc/Ttc |
| <b>m.15623G&gt;C</b> | Missense variant       | <i>MT-CYB</i> | MODERATE | p.A293P | 25.64 | Gcc/Ccc |
| <b>m.15664C&gt;G</b> | Missense variant       | <i>MT-CYB</i> | MODERATE | p.I306M | 54.35 | atC/atG |
| <b>m.15665C&gt;G</b> | Missense variant       | <i>MT-CYB</i> | MODERATE | p.L307V | 12.77 | Ctc/Gtc |
| <b>m.15668C&gt;G</b> | Missense variant       | <i>MT-CYB</i> | MODERATE | p.H308D | 32.69 | Cat/Gat |
| <b>m.15884G&gt;T</b> | Missense variant       | <i>MT-CYB</i> | MODERATE | p.A380S | 24.07 | Gcc/Tcc |
| <b>m.3932C&gt;A</b>  | Stop-gained            | <i>MT-ND1</i> | HIGH     | p.S209X | 72.06 | tCa/tAa |
| <b>m.5057C&gt;A</b>  | Stop-gained            | <i>MT-ND2</i> | HIGH     | p.Y196X | 23.4  | taC/taA |
| <b>m.5905T&gt;G</b>  | Stop-gained&start-lost | <i>MT-CO1</i> | HIGH     | p.M1X   | 60    | aTg/aGg |
| <b>m.6535C&gt;G</b>  | Stop-gained            | <i>MT-CO1</i> | HIGH     | p.T211X | 61.54 | aCa/aGa |
| <b>m.6596C&gt;G</b>  | Stop-gained            | <i>MT-CO1</i> | HIGH     | p.Y231X | 26.19 | taC/taG |
| <b>m.7705T&gt;G</b>  | Stop-gained            | <i>MT-CO2</i> | HIGH     | p.Y40X  | 56.52 | taT/taG |
| <b>m.11097C&gt;G</b> | Stop-gained            | <i>MT-ND4</i> | HIGH     | p.T113X | 18.07 | aCa/aGa |
| <b>m.12432C&gt;G</b> | Stop-gained            | <i>MT-ND5</i> | HIGH     | p.Y32X  | 48.57 | taC/taG |

Supplementary table 18: Position of SVs and their heteroplasmy percentage in bulk myeloid cells from 3 MDS patients.

| Type of SVs | Breakpoints   | Size (nt)      | Gene          | HET%  |
|-------------|---------------|----------------|---------------|-------|
| Deletions   | 4937-4938     | <i>MT-ND2</i>  | 1             | 1.89  |
|             | 5390-5392     | <i>MT-ND2</i>  | 2             | 4.38  |
|             | 11959-11961   | <i>MT-ND4</i>  | 2             | 20.65 |
|             | 11962-11964   | <i>MT-ND4</i>  | 2             | 5.73  |
|             | 12638-12639   | <i>MT-ND5</i>  | 1             | 3.64  |
|             | 14951-14952   | <i>MT-CYB</i>  | 1             | 2.94  |
|             | 7183-7186     | <i>MT-CO1</i>  | 3             | 2.33  |
|             | 11490-11491   | <i>MT-ND4</i>  | 1             | 3.45  |
|             | 11959-11961   | <i>MT-ND4</i>  | 2             | 6.45  |
|             | 12046-12048   | <i>MT-ND4</i>  | 2             | 6.84  |
|             | 12638-12639   | <i>MT-ND5</i>  | 1             | 17.74 |
|             | 14641-14644   | <i>MT-CYB</i>  | 3             | 4.55  |
|             | 2638-2647     | <i>MT-RNR2</i> | 8             | 2.97  |
|             | Inversions    | 10326-10393    | <i>MT-ND4</i> | 68    |
| Insertions  | 158-158       | D-loop         | 1             | 5     |
|             | 1547-1547     | <i>MT-RNR1</i> | 1             | 8.7   |
|             | 4852-4852     | <i>MT-ND2</i>  | 4             | 16.95 |
|             | 4930-4930     | <i>MT-ND2</i>  | 1             | 11.29 |
|             | 5387-5387     | <i>MT-ND2</i>  | 2             | 8.19  |
|             | 5391-5391     | <i>MT-ND2</i>  | 1             | 19.83 |
|             | 9037-9037     | <i>MT-ATP6</i> | 2             | 4.48  |
|             | 12039-12039   | <i>MT-ND4</i>  | 4             | 3.08  |
|             | 12040-12040   | <i>MT-ND4</i>  | 5             | 1.05  |
|             | 12041-12041   | <i>MT-ND4</i>  | 1             | 6.06  |
|             | 14125-14125   | <i>MT-ND5</i>  | 7             | 2.3   |
|             | 16069-16069   | D-loop         | 3             | 6.52  |
|             | 16251-16251   | D-loop         | 3             | 7.41  |
|             | 3791-3791     | <i>MT-ND1</i>  | 1             | 5.71  |
|             | 5128-5128     | <i>MT-ND2</i>  | 1             | 11.11 |
|             | 7185-7185     | <i>MT-CO1</i>  | 3             | 5.85  |
|             | 7189-7189     | <i>MT-CO1</i>  | 1             | 5.84  |
|             | 10147-10147   | <i>MT-ND3</i>  | 2             | 14.75 |
|             | 11712-11712   | <i>MT-ND4</i>  | 2             | 15.38 |
|             | 12680-12680   | <i>MT-ND4</i>  | 3             | 26.42 |
| 14053-14053 | <i>MT-ND5</i> | 1              | 1.52          |       |
| 14125-14125 | <i>MT-ND5</i> | 7              | 2.08          |       |



---

|             |               |   |      |
|-------------|---------------|---|------|
| 16251-16251 | D-loop        | 3 | 9.8  |
| 6049-6049   | <i>MT-COI</i> | 1 | 3.27 |

---

Supplementary table 19: Position of SVs and their heteroplasmy percentage in single myeloid cells from 3 MDS patients.

| Type of SVs | Breakpoints | Size (nt)     | Gene                     | HET%          |
|-------------|-------------|---------------|--------------------------|---------------|
| Deletions   | 5315–5316   | 1             | <i>MT-ND2</i>            | 8.33          |
|             | 4878–4879   | 1             | <i>MT-ND2</i>            | 1.08          |
|             | 4849–4850   | 1             | <i>MT-ND2</i>            | 1.87          |
|             | 4780–4781   | 1             | <i>MT-ND2</i>            | 0.81          |
|             | 1869–1870   | 1             | <i>MT-RNR2</i>           | 15.38         |
|             | 16264–16265 | 1             | D-loop                   | 1.45          |
|             | 16234–16235 | 1             | D-loop                   | 2.74          |
|             | 16199–16200 | 1             | D-loop                   | 5.03          |
|             | 16194–16196 | 2             | D-loop                   | 4.51          |
|             | 15900–15901 | 1             | <i>MT-TT</i>             | 1.62          |
|             | 15524–15527 | 3             | <i>MT-CYB</i>            | 18.03         |
|             | 12228–12423 | 195           | <i>MT-ND4</i>            | 25.00         |
|             | 12076–12461 | 385           | <i>MT-ND4</i>            | 28.57         |
|             | 10841–10842 | 1             | <i>MT-ND4</i>            | 3.85          |
|             | 10626–10627 | 1             | <i>MT-ND4L</i>           | 2.86          |
|             | 10360–10362 | 2             | <i>MT-ND3</i>            | 2.06          |
|             | Inversions  | 4627–4791     | 164                      | <i>MT-ND2</i> |
| 72–432      |             | 360           | D-loop                   | 11.76         |
| 6587–6589   |             | 134           | <i>MT-CO1</i>            | 26.86         |
| 5854–5939   |             | 85            | <i>MT-TY</i>             | 10.53         |
| 4914–4975   |             | 61            | <i>MT-ND2</i>            | 1.35          |
| 4890–4966   |             | 76            | <i>MT-ND2</i>            | 3.95          |
| 4883–4975   |             | 92            | <i>MT-ND2</i>            | 1.14          |
| 4634–4851   |             | 219           | <i>MT-ND2</i>            | 31.37         |
| 2432–2811   |             | 379           | <i>MT-RNR2</i>           | 6.45          |
| 2347–2430   |             | 83            | <i>MT-RNR2</i>           | 7.41          |
| 1925–1980   |             | 55            | <i>MT-RNR2</i>           | 18.75         |
| 15910–16088 |             | 188           | <i>MT-TT ...MT-TP</i>    | 3.33          |
| 1562–1650   |             | 90            | <i>MT-RNR1</i>           | 20.00         |
| 14138–14598 |             | 472           | <i>MT-ND5 ... MT-ND6</i> | 71.43         |
| 12562–12735 |             | 173           | <i>MT-ND5</i>            | 37.50         |
| 12470–12657 |             | 187           | <i>MT-ND5</i>            | 40.00         |
| 12292–12511 |             | 219           | <i>MT-TL2 ...MT-ND5</i>  | 60.00         |
| 12009–12084 | 75          | <i>MT-ND4</i> | 44.44                    |               |
| 11561–11643 | 82          | <i>MT-ND4</i> | 1.85                     |               |
| 11477–11584 | 109         | <i>MT-ND4</i> | 12.21                    |               |

|                   |             |    |                |       |
|-------------------|-------------|----|----------------|-------|
|                   | 227–230     | 3  | D-loop         | 11.76 |
|                   | 1628–1631   | 3  | <i>MT-RNR2</i> | 19.23 |
|                   | 4700–4700   | 1  | <i>MT-ND2</i>  | 0.92  |
|                   | 6477–6477   | 24 | <i>MT-CO1</i>  | 0.62  |
|                   | 1960–1960   | 9  | <i>MT-RNR2</i> | 10.00 |
|                   | 4622–4622   | 1  | <i>MT-ND2</i>  | 2.78  |
|                   | 4623–4623   | 4  | <i>MT-ND2</i>  | 41.98 |
|                   | 4626–4626   | 6  | <i>MT-ND2</i>  | 36.97 |
|                   | 4628–4628   | 3  | <i>MT-ND2</i>  | 6.47  |
|                   | 4794–4794   | 1  | <i>MT-ND2</i>  | 1.53  |
|                   | 4847–4847   | 4  | <i>MT-ND2</i>  | 2.22  |
|                   | 4855–4855   | 1  | <i>MT-ND2</i>  | 1.34  |
|                   | 4859–4859   | 2  | <i>MT-ND2</i>  | 1.31  |
|                   | 4865–4865   | 1  | <i>MT-ND2</i>  | 1.36  |
|                   | 4889–4889   | 10 | <i>MT-ND2</i>  | 5.88  |
|                   | 4890–4890   | 5  | <i>MT-ND2</i>  | 4.92  |
|                   | 4894–4894   | 2  | <i>MT-ND2</i>  | 2.02  |
|                   | 4973–4973   | 3  | <i>MT-ND2</i>  | 5.88  |
|                   | 4974–4974   | 7  | <i>MT-ND2</i>  | 4.00  |
|                   | 4975–4975   | 5  | <i>MT-ND2</i>  | 10.00 |
| <b>Insertions</b> | 6377–6377   | 6  | <i>MT-CO1</i>  | 23.33 |
|                   | 6438–6438   | 10 | <i>MT-CO1</i>  | 1.65  |
|                   | 6444–6444   | 5  | <i>MT-CO1</i>  | 9.24  |
|                   | 6589–6589   | 1  | <i>MT-CO1</i>  | 6.71  |
|                   | 6721–6721   | 2  | <i>MT-CO1</i>  | 31.75 |
|                   | 6723–6723   | 10 | <i>MT-CO1</i>  | 8.99  |
|                   | 13051–13051 | 2  | <i>MT-ND5</i>  | 14.29 |
|                   | 11658–11658 | 39 | <i>MT-ND4</i>  | 2.35  |
|                   | 11497–11497 | 6  | <i>MT-ND4</i>  | 7.75  |
|                   | 11509–11509 | 5  | <i>MT-ND4</i>  | 14.68 |
|                   | 11533–11533 | 3  | <i>MT-ND4</i>  | 1.63  |
|                   | 11559–11559 | 19 | <i>MT-ND4</i>  | 1.11  |
|                   | 11579–11579 | 4  | <i>MT-ND4</i>  | 3.66  |
|                   | 11583–11583 | 2  | <i>MT-ND4</i>  | 6.05  |
|                   | 11643–11643 | 9  | <i>MT-ND4</i>  | 1.19  |
|                   | 11656–11656 | 4  | <i>MT-ND4</i>  | 1.2   |
|                   | 11657–11657 | 11 | <i>MT-ND4</i>  | 1.23  |
|                   | 11679–11679 | 3  | <i>MT-ND4</i>  | 3.85  |
|                   | 11680–11680 | 10 | <i>MT-ND4</i>  | 7.38  |
|                   | 11706–11706 | 2  | <i>MT-ND4</i>  | 2.35  |

|                            |             |      |                |       |
|----------------------------|-------------|------|----------------|-------|
|                            | 11763–11763 | 8    | <i>MT-ND4</i>  | 16    |
|                            | 11767–11767 | 6    | <i>MT-ND4</i>  | 11.32 |
|                            | 5842–5842   | 4    | <i>MT-TY</i>   | 10    |
|                            | 6085–6085   | 3    | <i>MT-CO1</i>  | 5.56  |
|                            | 6299–6299   | 2    | <i>MT-CO1</i>  | 5.71  |
|                            | 80–80       | 3    | D-loop         | 4.17  |
|                            | 1926–1926   | 1    | <i>MT-RNR2</i> | 6.25  |
|                            | 2054–2054   | 1    | <i>MT-RNR2</i> | 1.68  |
|                            | 2415–2415   | 2    | <i>MT-RNR2</i> | 4.26  |
|                            | 2422–2422   | 2    | <i>MT-RNR2</i> | 4.82  |
|                            | 2754–2754   | 10   | <i>MT-RNR2</i> | 2.9   |
|                            | 6945–6945   | 1    | <i>MT-CO1</i>  | 2.2   |
|                            | 15506–15506 | 4    | <i>MT-CYB</i>  | 5.56  |
|                            | 15522–15522 | 2    | <i>MT-CYB</i>  | 11.76 |
|                            | 15525–15525 | 2    | <i>MT-CYB</i>  | 18.6  |
|                            | 15648–15648 | 8    | <i>MT-CYB</i>  | 4.41  |
|                            | 15649–15649 | 14   | <i>MT-CYB</i>  | 6.9   |
|                            | 15650–15650 | 12   | <i>MT-CYB</i>  | 2.9   |
|                            | 15883–15883 | 1    | <i>MT-CYB</i>  | 6.76  |
|                            | 15898–15898 | 1    | <i>MT-TT</i>   | 30    |
|                            | 15904–15904 | 1    | <i>MT-TT</i>   | 40.68 |
|                            | 16205–16205 | 3    | D-loop         | 1.73  |
|                            | 16272–16272 | 10   | D-loop         | 30.77 |
|                            | 16276–16276 | 1    | D-loop         | 13.98 |
|                            | 4503–4503   | 1    | <i>MT-ND2</i>  | 11.11 |
|                            | 11471–11763 | 292  | <i>MT-ND4</i>  | 42.86 |
|                            | 11509–11670 | 162  | <i>MT-ND4</i>  | 41.13 |
|                            | 11512–11673 | 161  | <i>MT-ND4</i>  | 2.63  |
|                            | 9409–12697  | 3288 | <i>MT-CO3</i>  | 36.96 |
| <b>Tandem duplications</b> | 6888–7447   | 559  | <i>MT-CO1</i>  | 14.28 |
|                            | 4627–4975   | 348  | <i>MT-ND2</i>  | 76.47 |
|                            | 4787–4877   | 90   | <i>MT-ND2</i>  | 0.81  |
|                            | 6430–6581   | 151  | <i>MT-CO1</i>  | 1.20  |

Supplementary table 20: Position of SNVs, their consequences, and heteroplasmy percentage in bulk myeloid cells from 3 MDS patients.

| Substitution | Consequence      | Impact   | Gene          | Amino acid substitution | Codons  | HET%  | Existing variants | Phenotype data                     |
|--------------|------------------|----------|---------------|-------------------------|---------|-------|-------------------|------------------------------------|
| m.3322C>A    | Missense variant | MODERATE | <i>MT-ND1</i> | p.L6I                   | Ctc/Atc | 10.88 |                   |                                    |
| m.3406C>G    | Missense variant | MODERATE | <i>MT-ND1</i> | p.R34G                  | Cgc/Ggc | 17.33 |                   |                                    |
| m.3420C>G    | Missense variant | MODERATE | <i>MT-ND1</i> | p.N38K                  | aaC/aaG | 13.56 |                   |                                    |
| m.3459C>G    | Missense variant | MODERATE | <i>MT-ND1</i> | p.D51E                  | gaC/gaG | 11.32 |                   |                                    |
| m.3474C>G    | Missense variant | MODERATE | <i>MT-ND1</i> | p.F56L                  | ttC/ttG | 17.16 |                   |                                    |
| m.3536T>C    | Missense variant | MODERATE | <i>MT-ND1</i> | p.L77S                  | tTa/tCa | 10.58 |                   |                                    |
| m.3593T>G    | Missense variant | MODERATE | <i>MT-ND1</i> | p.V96G                  | gTc/gGc | 18.45 |                   |                                    |
| m.3602A>G    | Missense variant | MODERATE | <i>MT-ND1</i> | p.N99S                  | aAc/aGc | 13.55 |                   |                                    |
| m.3700G>T    | Missense variant | MODERATE | <i>MT-ND1</i> | p.A132S                 | Gca/Tca | 10.26 |                   |                                    |
| m.3945C>G    | Missense variant | MODERATE | <i>MT-ND1</i> | p.I213M                 | atC/atG | 54.55 |                   |                                    |
| m.4024A>G    | Missense variant | MODERATE | <i>MT-ND1</i> | p.T240A                 | Aca/Gca | 14.37 |                   |                                    |
| m.4697C>G    | Missense variant | MODERATE | <i>MT-ND2</i> | p.F76L                  | ttC/ttG | 10.53 |                   |                                    |
| m.4966G>C    | Missense variant | MODERATE | <i>MT-ND2</i> | p.S166T                 | aGt/aCt | 10.44 |                   |                                    |
| m.4985A>C    | Missense variant | MODERATE | <i>MT-ND2</i> | p.Q172H                 | caA/caC | 10.96 |                   |                                    |
| m.5053C>A    | Missense variant | MODERATE | <i>MT-ND2</i> | p.P195Q                 | cCg/cAg | 10.94 |                   |                                    |
| m.5212T>G    | Missense variant | MODERATE | <i>MT-ND2</i> | p.L248R                 | cTc/cGc | 18.28 |                   |                                    |
| m.5236C>A    | Missense variant | MODERATE | <i>MT-ND2</i> | p.P256Q                 | cCg/cAg | 11.11 |                   |                                    |
| m.5300C>G    | Missense variant | MODERATE | <i>MT-ND2</i> | p.I277M                 | atC/atG | 12.93 |                   |                                    |
| m.5362A>C    | Missense variant | MODERATE | <i>MT-ND2</i> | p.Y298S                 | tAc/tCc | 16.41 |                   |                                    |
| m.5909C>G    | Missense variant | MODERATE | <i>MT-CO1</i> | p.F2L                   | ttC/ttG | 11.11 |                   |                                    |
| m.6024C>A    | Missense variant | MODERATE | <i>MT-CO1</i> | p.L41M                  | Ctg/Atg | 50.16 |                   |                                    |
| m.6189C>A    | Missense variant | MODERATE | <i>MT-CO1</i> | p.R96S                  | Cgc/Agc | 17.65 |                   |                                    |
| m.6656C>G    | Missense variant | MODERATE | <i>MT-CO1</i> | p.F251L                 | ttC/ttG | 10.98 |                   |                                    |
| m.6737A>C    | Missense variant | MODERATE | <i>MT-CO1</i> | p.M278I                 | atA/atC | 17.05 |                   |                                    |
| m.6768G>T    | Missense variant | MODERATE | <i>MT-CO1</i> | p.A289S                 | Gca/Tca | 12.38 |                   |                                    |
| m.6783A>T    | Missense variant | MODERATE | <i>MT-CO1</i> | p.T294S                 | Aca/Tca | 13.48 |                   |                                    |
| m.6840G>T    | Missense variant | MODERATE | <i>MT-CO1</i> | p.A313S                 | Gct/Tct | 15.28 |                   |                                    |
| m.7215C>A    | Stop-gained      | HIGH     | <i>MT-CO1</i> | p.R438X                 | Cga/Aga | 10.87 |                   |                                    |
| m.7325A>C    | Missense variant | MODERATE | <i>MT-CO1</i> | p.E474D                 | gaA/gaC | 22.7  |                   |                                    |
| m.7372T>G    | Stop-gained      | HIGH     | <i>MT-CO1</i> | p.M490X                 | aTa/aGa | 10.34 |                   |                                    |
| m.7421A>T    | Missense variant | MODERATE | <i>MT-CO1</i> | p.E506D                 | gaA/gaT | 13.33 |                   |                                    |
| m.7657T>A    | Missense variant | MODERATE | <i>MT-CO2</i> | p.H24Q                  | caT/caA | 15.04 |                   |                                    |
| m.7695T>A    | Missense variant | MODERATE | <i>MT-CO2</i> | p.L37Q                  | cTa/cAa | 14.56 |                   |                                    |
| m.7784A>C    | Missense variant | MODERATE | <i>MT-CO2</i> | p.I67L                  | Atc/Ctc | 17.22 |                   |                                    |
| m.7814G>T    | Missense variant | MODERATE | <i>MT-CO2</i> | p.A77S                  | Gcc/Tcc | 16.13 | COSM1155680       | <a href="#">Endometrium tumour</a> |
| m.7815C>G    | Missense variant | MODERATE | <i>MT-CO2</i> | p.A77G                  | gCc/gGc | 11.76 |                   |                                    |

|                      |                  |          |                |         |         |       |             |
|----------------------|------------------|----------|----------------|---------|---------|-------|-------------|
| <b>m.7845C&gt;G</b>  | Stop-gained      | HIGH     | <i>MT-CO2</i>  | p.T87X  | aCa/aGa | 15.34 |             |
| <b>m.7909C&gt;G</b>  | Stop-gained      | HIGH     | <i>MT-CO2</i>  | p.Y108X | taC/taG | 19.35 |             |
| <b>m.7936C&gt;G</b>  | Missense variant | MODERATE | <i>MT-CO2</i>  | p.I117M | atC/atG | 10.86 |             |
| <b>m.7985C&gt;G</b>  | Missense variant | MODERATE | <i>MT-CO2</i>  | p.R134G | Cga/Gga | 13.1  |             |
| <b>m.8022T&gt;G</b>  | Missense variant | MODERATE | <i>MT-CO2</i>  | p.I146S | aTt/aGt | 32.43 |             |
| <b>m.8066C&gt;A</b>  | Missense variant | MODERATE | <i>MT-CO2</i>  | p.H161N | Cac/Aac | 24.95 |             |
| <b>m.8187G&gt;C</b>  | Missense variant | MODERATE | <i>MT-CO2</i>  | p.G201A | gGa/gCa | 10.56 |             |
| <b>m.8247T&gt;C</b>  | Missense variant | MODERATE | <i>MT-CO2</i>  | p.M221T | aTa/aCa | 15.87 |             |
| <b>m.8259T&gt;A</b>  | Missense variant | MODERATE | <i>MT-CO2</i>  | p.F225Y | tTt/tAt | 13.27 |             |
| <b>m.8783G&gt;A</b>  | Missense variant | MODERATE | <i>MT-ATP6</i> | p.G86E  | gGa/gAa | 10.11 |             |
| <b>m.8836A&gt;T</b>  | Missense variant | MODERATE | <i>MT-ATP6</i> | p.M104L | Atg/Ttg | 11.32 |             |
| <b>m.8864T&gt;G</b>  | Missense variant | MODERATE | <i>MT-ATP6</i> | p.V113G | gTg/gGg | 14.44 |             |
| <b>m.8870T&gt;C</b>  | Missense variant | MODERATE | <i>MT-ATP6</i> | p.M115T | aTa/aCa | 10.4  |             |
| <b>m.9188A&gt;G</b>  | Missense variant | MODERATE | <i>MT-ATP6</i> | p.Y221C | tAc/tGc | 13.62 |             |
| <b>m.9387G&gt;C</b>  | Missense variant | MODERATE | <i>MT-CO3</i>  | p.V61L  | Gta/Cta | 15.48 |             |
| <b>m.9447T&gt;G</b>  | Missense variant | MODERATE | <i>MT-CO3</i>  | p.Y81D  | Tac/Gac | 13.33 |             |
| <b>m.9488C&gt;G</b>  | Missense variant | MODERATE | <i>MT-CO3</i>  | p.F94L  | ttC/ttG | 10.34 |             |
| <b>m.9489G&gt;C</b>  | Missense variant | MODERATE | <i>MT-CO3</i>  | p.A95P  | Gca/Cca | 11.54 |             |
| <b>m.9512C&gt;G</b>  | Stop-gained      | HIGH     | <i>MT-CO3</i>  | p.Y102X | taC/taG | 19.05 |             |
| <b>m.9631T&gt;A</b>  | Missense variant | MODERATE | <i>MT-CO3</i>  | p.V142E | gTa/gAa | 25.11 |             |
| <b>m.9646C&gt;G</b>  | Missense variant | MODERATE | <i>MT-CO3</i>  | p.A147G | gCt/gGt | 31.58 |             |
| <b>m.9710A&gt;C</b>  | Missense variant | MODERATE | <i>MT-CO3</i>  | p.L168F | ttA/ttC | 11.34 |             |
| <b>m.9770T&gt;G</b>  | Missense variant | MODERATE | <i>MT-CO3</i>  | p.I188M | atT/atG | 20.77 |             |
| <b>m.9785C&gt;A</b>  | Stop-gained      | HIGH     | <i>MT-CO3</i>  | p.Y193X | taC/taA | 10.39 |             |
| <b>m.9818C&gt;G</b>  | Missense variant | MODERATE | <i>MT-CO3</i>  | p.H204Q | caC/caG | 11.48 | rs2854139   |
| <b>m.9865T&gt;G</b>  | Missense variant | MODERATE | <i>MT-CO3</i>  | p.I220S | aTc/aGc | 13.83 |             |
| <b>m.9899T&gt;G</b>  | Missense variant | MODERATE | <i>MT-CO3</i>  | p.H231Q | caT/caG | 12.62 | rs41345446  |
| <b>m.9909T&gt;C</b>  | Missense variant | MODERATE | <i>MT-CO3</i>  | p.F235L | Ttc/Ctc | 13.92 | rs28690056  |
| <b>m.10111T&gt;A</b> | Missense variant | MODERATE | <i>MT-ND3</i>  | p.M18K  | aTa/aAa | 44.44 |             |
| <b>m.10203G&gt;C</b> | Missense variant | MODERATE | <i>MT-ND3</i>  | p.V49L  | Gtc/Ctc | 11.02 |             |
| <b>m.10536C&gt;G</b> | Missense variant | MODERATE | <i>MT-ND4L</i> | p.R23G  | Cgc/Ggc | 10.91 |             |
| <b>m.10593A&gt;T</b> | Missense variant | MODERATE | <i>MT-ND4L</i> | p.I42F  | Att/Ttt | 12.62 |             |
| <b>m.10640T&gt;G</b> | Missense variant | MODERATE | <i>MT-ND4L</i> | p.N57K  | aaT/aaG | 45.69 | rs386419955 |
| <b>m.10676C&gt;G</b> | Missense variant | MODERATE | <i>MT-ND4L</i> | p.C69W  | tgC/tgG | 13.41 |             |
| <b>m.10711T&gt;A</b> | Missense variant | MODERATE | <i>MT-ND4L</i> | p.I81N  | aTc/aAc | 39.14 |             |
| <b>m.11019A&gt;C</b> | Missense variant | MODERATE | <i>MT-ND4</i>  | p.E87A  | gAa/gCa | 10.53 |             |
| <b>m.11145C&gt;T</b> | Missense variant | MODERATE | <i>MT-ND4</i>  | p.T129I | aCc/aTc | 10.58 |             |
| <b>m.11330G&gt;C</b> | Missense variant | MODERATE | <i>MT-ND4</i>  | p.A191P | Gcc/Ccc | 20.22 |             |
| <b>m.11435G&gt;C</b> | Missense variant | MODERATE | <i>MT-ND4</i>  | p.A226P | Gct/Cct | 12.66 |             |
| <b>m.11445T&gt;G</b> | Stop-gained      | HIGH     | <i>MT-ND4</i>  | p.M229X | aTa/aGa | 13.77 |             |

|                      |                  |          |               |         |         |       |             |                                    |
|----------------------|------------------|----------|---------------|---------|---------|-------|-------------|------------------------------------|
| <b>m.11514C&gt;T</b> | Missense variant | MODERATE | <i>MT-ND4</i> | p.P252L | cCc/cTc | 12.04 |             |                                    |
| <b>m.11675C&gt;T</b> | Missense variant | MODERATE | <i>MT-ND4</i> | p.P306S | Ccc/Tcc | 12.31 |             |                                    |
| <b>m.11848C&gt;A</b> | Stop-gained      | HIGH     | <i>MT-ND4</i> | p.S363X | agC/agA | 20.95 |             |                                    |
| <b>m.11924T&gt;C</b> | Missense variant | MODERATE | <i>MT-ND4</i> | p.S389P | Tca/Cca | 31.19 |             |                                    |
| <b>m.12373A&gt;T</b> | Missense variant | MODERATE | <i>MT-ND5</i> | p.T13S  | Act/Tct | 19.21 |             |                                    |
| <b>m.12457G&gt;A</b> | Missense variant | MODERATE | <i>MT-ND5</i> | p.A41T  | Gca/Aca | 16.44 | COSM1155520 | <a href="#">Endometrium tumour</a> |
| <b>m.12499A&gt;T</b> | Missense variant | MODERATE | <i>MT-ND5</i> | p.M55L  | Atg/Ttg | 19.39 |             |                                    |
| <b>m.12523A&gt;G</b> | Missense variant | MODERATE | <i>MT-ND5</i> | p.I63V  | Atc/Gtc | 38.59 |             |                                    |
| <b>m.12569T&gt;A</b> | Missense variant | MODERATE | <i>MT-ND5</i> | p.L78Q  | cTa/cAa | 14.22 | COSM1155523 | <a href="#">Endometrium tumour</a> |
| <b>m.12788C&gt;A</b> | Missense variant | MODERATE | <i>MT-ND5</i> | p.S151Y | tCc/tAc | 10.47 |             |                                    |
| <b>m.12841A&gt;G</b> | Missense variant | MODERATE | <i>MT-ND5</i> | p.I169V | Att/Gtt | 10.47 |             |                                    |
| <b>m.12951C&gt;G</b> | Missense variant | MODERATE | <i>MT-ND5</i> | p.N205K | aaC/aaG | 13.92 |             |                                    |
| <b>m.12968C&gt;G</b> | Missense variant | MODERATE | <i>MT-ND5</i> | p.T211S | aCc/aGc | 13.25 |             |                                    |
| <b>m.13045A&gt;T</b> | Missense variant | MODERATE | <i>MT-ND5</i> | p.M237L | Ata/Tta | 12.32 |             |                                    |
| <b>m.13142A&gt;T</b> | Missense variant | MODERATE | <i>MT-ND5</i> | p.N269I | aAt/aTt | 11.11 |             |                                    |
| <b>m.13198G&gt;C</b> | Missense variant | MODERATE | <i>MT-ND5</i> | p.A288P | Gca/Cca | 20.63 |             |                                    |
| <b>m.13444T&gt;G</b> | Missense variant | MODERATE | <i>MT-ND5</i> | p.S370A | Tca/Gca | 54.91 |             |                                    |
| <b>m.13495A&gt;C</b> | Missense variant | MODERATE | <i>MT-ND5</i> | p.T387P | Aca/Cca | 31.52 |             |                                    |
| <b>m.13511A&gt;G</b> | Stop-gained      | HIGH     | <i>MT-ND5</i> | p.K392X | aAa/aGa | 10.56 |             |                                    |
| <b>m.13556G&gt;C</b> | Missense variant | MODERATE | <i>MT-ND5</i> | p.W407S | tGa/tCa | 12.11 | COSM1720929 | <a href="#">Skin tumour</a>        |
| <b>m.13579G&gt;T</b> | Missense variant | MODERATE | <i>MT-ND5</i> | p.A415S | Gct/Tct | 10.84 |             |                                    |
| <b>m.13790A&gt;G</b> | Missense variant | MODERATE | <i>MT-ND5</i> | p.Y485C | tAc/tGc | 12.82 |             |                                    |
| <b>m.13823T&gt;C</b> | Missense variant | MODERATE | <i>MT-ND5</i> | p.L496P | cTa/cCa | 12.86 |             |                                    |
| <b>m.14363A&gt;T</b> | Missense variant | MODERATE | <i>MT-ND6</i> | p.L104Q | cTg/cAg | 11.35 |             |                                    |
| <b>m.14427C&gt;A</b> | Missense variant | MODERATE | <i>MT-ND6</i> | p.G83W  | Ggg/Tgg | 43.9  |             |                                    |
| <b>m.14556A&gt;T</b> | Missense variant | MODERATE | <i>MT-ND6</i> | p.C40S  | Tgt/Agt | 12.26 |             |                                    |
| <b>m.14927A&gt;G</b> | Missense variant | MODERATE | <i>MT-CYB</i> | p.T61A  | Acc/Gcc | 22.52 | rs201551481 |                                    |
| <b>m.14962C&gt;G</b> | Missense variant | MODERATE | <i>MT-CYB</i> | p.D72E  | gaC/gaG | 11.11 |             |                                    |
| <b>m.14990C&gt;G</b> | Missense variant | MODERATE | <i>MT-CYB</i> | p.L82V  | Ctt/Gtt | 20    |             |                                    |
| <b>m.15030T&gt;G</b> | Missense variant | MODERATE | <i>MT-CYB</i> | p.F95C  | fTc/tGc | 17.65 |             |                                    |
| <b>m.15097T&gt;G</b> | Missense variant | MODERATE | <i>MT-CYB</i> | p.I117M | atT/atG | 14.45 |             |                                    |
| <b>m.15108T&gt;C</b> | Missense variant | MODERATE | <i>MT-CYB</i> | p.L121P | cTt/cCt | 13.94 |             |                                    |
| <b>m.15255T&gt;G</b> | Missense variant | MODERATE | <i>MT-CYB</i> | p.V170G | gTa/gGa | 32.33 |             |                                    |
| <b>m.15502C&gt;G</b> | Missense variant | MODERATE | <i>MT-CYB</i> | p.D252E | gaC/gaG | 17.25 |             |                                    |
| <b>m.15653A&gt;C</b> | Missense variant | MODERATE | <i>MT-CYB</i> | p.M303L | Ata/Cta | 12.68 |             |                                    |

Supplementary table 21: Position of SNVs, their consequences, and heteroplasmy percentage in single myeloid cells obtained from 3 MDS patients.

| Substitution | Consequence      | Gene          | Impact   | Amino acid change | HET%  | Codons  | Existing variants               | Phenotype data    |
|--------------|------------------|---------------|----------|-------------------|-------|---------|---------------------------------|-------------------|
| m.3310C>T    | Missense variant | <i>MT-ND1</i> | MODERATE | p.P2S             | 30.56 | Ccc/Tcc |                                 |                   |
| m.3395A>G    | Missense variant | <i>MT-ND1</i> | MODERATE | p.Y30C            | 12.12 | tAt/tGt |                                 |                   |
| m.3524C>G    | Missense variant | <i>MT-ND1</i> | MODERATE | p.T73S            | 10.14 | aCc/aGc |                                 |                   |
| m.3841T>C    | Missense variant | <i>MT-ND1</i> | MODERATE | p.W179R           | 58.65 | Tga/Cga |                                 |                   |
| m.3844C>A    | Missense variant | <i>MT-ND1</i> | MODERATE | p.P180T           | 30.65 | Ccc/Acc |                                 |                   |
| m.3867C>A    | Missense variant | <i>MT-ND1</i> | MODERATE | p.I187M           | 38.89 | atC/atA |                                 |                   |
| m.3880G>C    | Missense variant | <i>MT-ND1</i> | MODERATE | p.E192Q           | 50.68 | Gag/Cag |                                 |                   |
| m.3910G>T    | Stop-gained      | <i>MT-ND1</i> | HIGH     | p.E202X           | 50    | Gaa/Taa |                                 |                   |
| m.3997A>C    | Missense variant | <i>MT-ND1</i> | MODERATE | p.I231L           | 38.37 | Att/Ctt |                                 |                   |
| m.4049A>C    | Missense variant | <i>MT-ND1</i> | MODERATE | p.D248A           | 21.95 | gAc/gCc |                                 |                   |
| m.4093A>T    | Missense variant | <i>MT-ND1</i> | MODERATE | p.T263S           | 68.42 | Acc/Tcc |                                 |                   |
| m.4117T>A    | Missense variant | <i>MT-ND1</i> | MODERATE | p.L271M           | 23.26 | Tta/Ata |                                 |                   |
| m.4227A>T    | Missense variant | <i>MT-ND1</i> | MODERATE | p.M307I           | 28.57 | atA/atT |                                 |                   |
| m.4495T>C    | Missense variant | <i>MT-ND2</i> | MODERATE | p.I9T             | 17.44 | aTc/aCc |                                 |                   |
| m.4518A>G    | Missense variant | <i>MT-ND2</i> | MODERATE | p.T17A            | 15.09 | Aca/Gea |                                 |                   |
| m.4593C>A    | Missense variant | <i>MT-ND2</i> | MODERATE | p.P42T            | 16.28 | Cca/Aca |                                 |                   |
| m.4697C>G    | Missense variant | <i>MT-ND2</i> | MODERATE | p.F76L            | 23.44 | ttC/ttG |                                 |                   |
| m.4710T>C    | Missense variant | <i>MT-ND2</i> | MODERATE | p.S81P            | 21.88 | Tcc/Ccc |                                 |                   |
| m.4732A>C    | Missense variant | <i>MT-ND2</i> | MODERATE | p.N88T            | 19.35 | aAt/aCt |                                 |                   |
| m.4767A>C    | Missense variant | <i>MT-ND2</i> | MODERATE | p.M100L           | 44.19 | Ata/Cta |                                 |                   |
| m.4839C>G    | Missense variant | <i>MT-ND2</i> | MODERATE | p.L124V           | 71.96 | Ctg/Gtg |                                 |                   |
| m.4897A>G    | Missense variant | <i>MT-ND2</i> | MODERATE | p.Y143C           | 32.39 | tAc/tGc |                                 |                   |
| m.4905T>A    | Missense variant | <i>MT-ND2</i> | MODERATE | p.S146T           | 12    | Tct/Act |                                 |                   |
| m.5169T>A    | Stop-gained      | <i>MT-ND2</i> | HIGH     | p.W234X           | 10.14 | Tga/Aga |                                 |                   |
| m.5201T>G    | Missense variant | <i>MT-ND2</i> | MODERATE | p.I244M           | 21.95 | atT/atG |                                 |                   |
| m.5302T>G    | Missense variant | <i>MT-ND2</i> | MODERATE | p.I278S           | 12.5  | aTc/aGc |                                 |                   |
| m.5420T>A    | Missense variant | <i>MT-ND2</i> | MODERATE | p.F317L           | 30.16 | ttT/ttA |                                 |                   |
| m.5946A>T    | Missense variant | <i>MT-COI</i> | MODERATE | p.I15F            | 12.12 | Att/Ttt |                                 |                   |
| m.5991G>T    | Missense variant | <i>MT-COI</i> | MODERATE | p.G30C            | 10.71 | Ggc/Tgc |                                 |                   |
| m.6052A>C    | Missense variant | <i>MT-COI</i> | MODERATE | p.N50T            | 68.42 | aAc/aCc |                                 |                   |
| m.6199A>T    | Missense variant | <i>MT-COI</i> | MODERATE | p.N99I            | 45.33 | aAc/aTc |                                 |                   |
| m.6340C>A    | Missense variant | <i>MT-COI</i> | MODERATE | p.T146N           | 78.26 | aCc/aAc |                                 |                   |
| m.6373C>G    | Missense variant | <i>MT-COI</i> | MODERATE | p.S157C           | 14.55 | tCt/tGt |                                 |                   |
| m.6376T>A    | Missense variant | <i>MT-COI</i> | MODERATE | p.I158N           | 21.52 | aTc/aAc |                                 |                   |
| m.6378T>A    | Missense variant | <i>MT-COI</i> | MODERATE | p.L159M           | 47.89 | Tta/Ata |                                 |                   |
| m.6496C>A    | Missense variant | <i>MT-COI</i> | MODERATE | p.S198Y           | 21.01 | tCt/tAt | COSM5656133<br>&<br>COSM5656134 | Hematopoietic and |



**lymphoid  
tissue tumor**

|                     |                  |                |          |         |       |         |                                 |                                   |
|---------------------|------------------|----------------|----------|---------|-------|---------|---------------------------------|-----------------------------------|
| <b>m.6511C&gt;G</b> | Missense variant | <i>MT-CO1</i>  | MODERATE | p.A203G | 12.5  | gCt/gGt |                                 |                                   |
| <b>m.6519A&gt;C</b> | Missense variant | <i>MT-CO1</i>  | MODERATE | p.I206L | 35.82 | Atc/Ctc |                                 |                                   |
| <b>m.6552A&gt;T</b> | Missense variant | <i>MT-CO1</i>  | MODERATE | p.T217S | 11.76 | Acc/Tcc |                                 |                                   |
| <b>m.6579G&gt;A</b> | Stop-gained      | <i>MT-CO1</i>  | HIGH     | p.G226X | 11.11 | Gga/Aga |                                 |                                   |
| <b>m.6724T&gt;G</b> | Missense variant | <i>MT-CO1</i>  | MODERATE | p.V274G | 26.79 | gTc/gGc |                                 |                                   |
| <b>m.6727G&gt;C</b> | Missense variant | <i>MT-CO1</i>  | MODERATE | p.W275S | 37.5  | tGa/tCa |                                 |                                   |
| <b>m.6732A&gt;G</b> | Missense variant | <i>MT-CO1</i>  | MODERATE | p.M277V | 44.07 | Atg/Gtg |                                 |                                   |
| <b>m.6777A&gt;G</b> | Missense variant | <i>MT-CO1</i>  | MODERATE | p.M292V | 11.43 | Ata/Gta |                                 |                                   |
| <b>m.6786G&gt;A</b> | Missense variant | <i>MT-CO1</i>  | MODERATE | p.V295M | 14.29 | Gta/Ata |                                 |                                   |
| <b>m.6801G&gt;T</b> | Missense variant | <i>MT-CO1</i>  | MODERATE | p.D300Y | 43.93 | Gac/Tac |                                 |                                   |
| <b>m.6938C&gt;A</b> | Missense variant | <i>MT-CO1</i>  | MODERATE | p.I345M | 19.66 | atC/atA |                                 |                                   |
| <b>m.7008G&gt;C</b> | Missense variant | <i>MT-CO1</i>  | MODERATE | p.D369H | 33.9  | Gac/Cac |                                 |                                   |
| <b>m.7060T&gt;C</b> | Missense variant | <i>MT-CO1</i>  | MODERATE | p.V386A | 26.67 | gTa/gCa |                                 |                                   |
| <b>m.7088C&gt;A</b> | Missense variant | <i>MT-CO1</i>  | MODERATE | p.H395Q | 26.32 | caC/caA |                                 |                                   |
| <b>m.7093T&gt;C</b> | Missense variant | <i>MT-CO1</i>  | MODERATE | p.F397S | 80.95 | tTt/tCt |                                 |                                   |
| <b>m.7185C&gt;G</b> | Missense variant | <i>MT-CO1</i>  | MODERATE | p.Q428E | 12.31 | Caa/Gaa |                                 |                                   |
| <b>m.7244C&gt;G</b> | Stop-gained      | <i>MT-CO1</i>  | HIGH     | p.Y447X | 17    | taC/taG |                                 |                                   |
| <b>m.7285C&gt;A</b> | Missense variant | <i>MT-CO1</i>  | MODERATE | p.S461Y | 12.82 | tCt/tAt |                                 |                                   |
| <b>m.7387T&gt;C</b> | Missense variant | <i>MT-CO1</i>  | MODERATE | p.L495P | 15.67 | cTa/cCa |                                 |                                   |
| <b>m.7592C&gt;A</b> | Missense variant | <i>MT-CO2</i>  | MODERATE | p.H3N   | 33.33 | Cat/Aat |                                 |                                   |
| <b>m.7657T&gt;A</b> | Missense variant | <i>MT-CO2</i>  | MODERATE | p.H24Q  | 16.67 | caT/caA |                                 |                                   |
| <b>m.7691T&gt;G</b> | Missense variant | <i>MT-CO2</i>  | MODERATE | p.F36V  | 78.95 | Ttc/Gtc |                                 |                                   |
| <b>m.7779G&gt;C</b> | Missense variant | <i>MT-CO2</i>  | MODERATE | p.W65S  | 24.27 | tGa/tCa |                                 |                                   |
| <b>m.7860A&gt;C</b> | Missense variant | <i>MT-CO2</i>  | MODERATE | p.D92A  | 11.94 | gAt/gCt |                                 |                                   |
| <b>m.7879A&gt;C</b> | Missense variant | <i>MT-CO2</i>  | MODERATE | p.K98N  | 25.58 | aaA/aaC |                                 |                                   |
| <b>m.7914A&gt;G</b> | Missense variant | <i>MT-CO2</i>  | MODERATE | p.Y110C | 12.2  | tAc/tGc |                                 |                                   |
| <b>m.8390T&gt;A</b> | Stop-gained      | <i>MT-ATP8</i> | HIGH     | p.W9X   | 20    | Tgg/Agg |                                 |                                   |
| <b>m.8735T&gt;C</b> | Missense variant | <i>MT-ATP6</i> | MODERATE | p.L70P  | 13.89 | cTt/cCt |                                 |                                   |
| <b>m.9035T&gt;A</b> | Missense variant | <i>MT-ATP6</i> | MODERATE | p.L170H | 26.04 | cTc/cAc |                                 |                                   |
| <b>m.9103T&gt;A</b> | Missense variant | <i>MT-ATP6</i> | MODERATE | p.F193I | 35    | Ttc/Atc |                                 |                                   |
| <b>m.9200A&gt;C</b> | Missense variant | <i>MT-ATP6</i> | MODERATE | p.N225T | 18.75 | aAc/aCc |                                 |                                   |
| <b>m.9270C&gt;G</b> | Missense variant | <i>MT-CO3</i>  | MODERATE | p.L22V  | 90.6  | Ctc/Gtc |                                 |                                   |
| <b>m.9315T&gt;G</b> | Missense variant | <i>MT-CO3</i>  | MODERATE | p.F37V  | 34.69 | Ttc/Gtc |                                 |                                   |
| <b>m.9384G&gt;C</b> | Missense variant | <i>MT-CO3</i>  | MODERATE | p.D60H  | 19.18 | Gat/Cat | COSM1138427<br>&<br>COSM1138428 | <a href="#">Kidney<br/>tumour</a> |
| <b>m.9517C&gt;T</b> | Missense variant | <i>MT-CO3</i>  | MODERATE | p.S104F | 12.5  | tCc/tTc |                                 |                                   |
| <b>m.9651C&gt;G</b> | Missense variant | <i>MT-CO3</i>  | MODERATE | p.H149D | 53.85 | Cat/Gat |                                 |                                   |
| <b>m.9718T&gt;C</b> | Missense variant | <i>MT-CO3</i>  | MODERATE | p.L171P | 60.53 | cTc/cCc |                                 |                                   |
| <b>m.9853C&gt;G</b> | Missense variant | <i>MT-CO3</i>  | MODERATE | p.T216S | 85.11 | aCt/aGt |                                 |                                   |

|                      |                                                             |                |          |         |       |         |                                 |                                        |
|----------------------|-------------------------------------------------------------|----------------|----------|---------|-------|---------|---------------------------------|----------------------------------------|
| <b>m.9861T&gt;G</b>  | Missense variant                                            | <i>MT-CO3</i>  | MODERATE | p.F219V | 72.58 | Ttc/Gtc |                                 |                                        |
| <b>m.9960C&gt;G</b>  | Missense variant                                            | <i>MT-CO3</i>  | MODERATE | p.L252V | 16.98 | Ctg/Gtg |                                 |                                        |
| <b>m.9983A&gt;C</b>  | Missense variant                                            | <i>MT-CO3</i>  | MODERATE | p.W259C | 12.9  | tgA/tgC |                                 |                                        |
| <b>m.10117T&gt;A</b> | Missense variant                                            | <i>MT-ND3</i>  | MODERATE | p.I20N  | 12.5  | aTt/aAt |                                 |                                        |
| <b>m.10151A&gt;T</b> | Missense variant                                            | <i>MT-ND3</i>  | MODERATE | p.M31I  | 15.62 | atA/atT |                                 |                                        |
| <b>m.10201G&gt;T</b> | Missense variant                                            | <i>MT-ND3</i>  | MODERATE | p.R48L  | 25    | cGc/cTc |                                 |                                        |
| <b>m.10204T&gt;C</b> | Missense variant                                            | <i>MT-ND3</i>  | MODERATE | p.V49A  | 60.71 | gTc/gCc |                                 |                                        |
| <b>m.10206C&gt;T</b> | Missense variant                                            | <i>MT-ND3</i>  | MODERATE | p.P50S  | 35    | Cct/Tct |                                 |                                        |
| <b>m.10261A&gt;C</b> | Missense variant                                            | <i>MT-ND3</i>  | MODERATE | p.E68A  | 41.86 | gAa/gCa |                                 |                                        |
| <b>m.10392G&gt;T</b> | Missense variant                                            | <i>MT-ND3</i>  | MODERATE | p.D112Y | 29.03 | Gac/Tac |                                 |                                        |
| <b>m.10396G&gt;T</b> | Missense variant                                            | <i>MT-ND3</i>  | MODERATE | p.W113L | 18.18 | tGa/tTa |                                 |                                        |
| <b>m.10484C&gt;G</b> | Stop-gained                                                 | <i>MT-ND4L</i> | HIGH     | p.Y5X   | 47.62 | taC/taG |                                 |                                        |
| <b>m.10615T&gt;C</b> | Missense variant                                            | <i>MT-ND4L</i> | MODERATE | p.L49P  | 15.56 | cTc/cCc |                                 |                                        |
| <b>m.10683G&gt;T</b> | Missense variant                                            | <i>MT-ND4L</i> | MODERATE | p.A72S  | 12.5  | Gcg/Tcg |                                 |                                        |
| <b>m.10740C&gt;T</b> | Missense variant                                            | <i>MT-ND4L</i> | MODERATE | p.H91Y  | 14.67 | Cat/Tat |                                 |                                        |
| <b>m.10759A&gt;T</b> | Missense variant                                            | <i>MT-ND4L</i> | MODERATE | p.Q97L  | 10.64 | cAa/cTa |                                 |                                        |
| <b>m.10836A&gt;T</b> | Missense variant                                            | <i>MT-ND4</i>  | MODERATE | p.N26I  | 10    | aAc/aTc |                                 |                                        |
| <b>m.11097C&gt;G</b> | Stop-gained                                                 | <i>MT-ND4</i>  | HIGH     | p.T113X | 11.58 | aCa/aGa |                                 |                                        |
| <b>m.11155C&gt;G</b> | Missense variant                                            | <i>MT-ND4</i>  | MODERATE | p.I132M | 14    | atC/atG |                                 |                                        |
| <b>m.11195G&gt;T</b> | Missense variant                                            | <i>MT-ND4</i>  | MODERATE | p.G146C | 18    | Ggc/Tgc |                                 |                                        |
| <b>m.11256A&gt;T</b> | Missense variant                                            | <i>MT-ND4</i>  | MODERATE | p.Y166F | 19.8  | tAc/tTc |                                 |                                        |
| <b>m.11303A&gt;T</b> | Missense variant                                            | <i>MT-ND4</i>  | MODERATE | p.T182S | 29.11 | Act/Tct |                                 |                                        |
| <b>m.11465T&gt;A</b> | Missense variant                                            | <i>MT-ND4</i>  | MODERATE | p.L236M | 11.43 | Tta/Ata |                                 |                                        |
| <b>m.11559G&gt;A</b> | Stop-gained                                                 | <i>MT-ND4</i>  | HIGH     | p.W267X | 48.48 | tGa/tAa |                                 |                                        |
| <b>m.11579T&gt;A</b> | Missense variant                                            | <i>MT-ND4</i>  | MODERATE | p.S274T | 41.67 | Tcc/Acc | COSM1155512                     | <a href="#">Endometrium tumour</a>     |
| <b>m.11595A&gt;G</b> | Missense variant                                            | <i>MT-ND4</i>  | MODERATE | p.Q279R | 10.26 | cAa/cGa |                                 |                                        |
| <b>m.11618G&gt;C</b> | Missense variant                                            | <i>MT-ND4</i>  | MODERATE | p.A287P | 17.14 | Gca/Cca |                                 |                                        |
| <b>m.11638C&gt;G</b> | Missense variant                                            | <i>MT-ND4</i>  | MODERATE | p.H293Q | 13.39 | caC/caG |                                 |                                        |
| <b>m.11682G&gt;C</b> | Missense variant                                            | <i>MT-ND4</i>  | MODERATE | p.S308T | 20.83 | aGc/aCc |                                 |                                        |
| <b>m.11771C&gt;G</b> | Missense variant                                            | <i>MT-ND4</i>  | MODERATE | p.H338D | 16.36 | Cac/Gac | COSM6716765<br>&<br>COSM6716766 | <a href="#">Large intestine tumour</a> |
| <b>m.11773C&gt;G</b> | Missense variant                                            | <i>MT-ND4</i>  | MODERATE | p.H338Q | 15.69 | caC/caG |                                 |                                        |
| <b>m.11948G&gt;T</b> | Missense variant                                            | <i>MT-ND4</i>  | MODERATE | p.G397W | 87.73 | Gga/Tga | COSM1155518                     | <a href="#">Endometrium tumour</a>     |
| <b>m.11993A&gt;T</b> | Missense variant                                            | <i>MT-ND4</i>  | MODERATE | p.T412S | 12.12 | Acc/Tcc |                                 |                                        |
| <b>m.12137T&gt;G</b> | Incomplete terminal codon variant & coding sequence variant | <i>MT-ND4</i>  | LOW      | p.X460  | 21.26 | T/G     |                                 |                                        |
| <b>m.12427T&gt;A</b> | Missense variant                                            | <i>MT-ND5</i>  | MODERATE | p.S31T  | 14.71 | Tca/Aca |                                 |                                        |
| <b>m.12441T&gt;G</b> | Stop-gained                                                 | <i>MT-ND5</i>  | HIGH     | p.Y35X  | 16.2  | taT/taG |                                 |                                        |
| <b>m.12538T&gt;A</b> | Stop-gained                                                 | <i>MT-ND5</i>  | HIGH     | p.W68X  | 23.21 | Tga/Aga |                                 |                                        |
| <b>m.12593C&gt;A</b> | Missense variant                                            | <i>MT-ND5</i>  | MODERATE | p.S86Y  | 75    | tCc/tAc |                                 |                                        |

|                      |                  |               |          |         |       |         |                                                |
|----------------------|------------------|---------------|----------|---------|-------|---------|------------------------------------------------|
| <b>m.12631T&gt;G</b> | Missense variant | <i>MT-ND5</i> | MODERATE | p.S99A  | 10.53 | Tcc/Gcc |                                                |
| <b>m.12655T&gt;C</b> | Missense variant | <i>MT-ND5</i> | MODERATE | p.Y107H | 13.51 | Tat/Cat |                                                |
| <b>m.12771G&gt;C</b> | Missense variant | <i>MT-ND5</i> | MODERATE | p.E145D | 96.61 | gaG/gaC | COSM1155528 <a href="#">Endometrium tumour</a> |
| <b>m.12795G&gt;T</b> | Missense variant | <i>MT-ND5</i> | MODERATE | p.L153F | 18.37 | ttG/ttT |                                                |
| <b>m.12867C&gt;G</b> | Missense variant | <i>MT-ND5</i> | MODERATE | p.I177M | 34.91 | atC/atG |                                                |
| <b>m.12868G&gt;T</b> | Missense variant | <i>MT-ND5</i> | MODERATE | p.G178C | 81.5  | Ggc/Tgc |                                                |
| <b>m.12875T&gt;C</b> | Missense variant | <i>MT-ND5</i> | MODERATE | p.I180T | 31.25 | aTc/aCc |                                                |
| <b>m.13210G&gt;A</b> | Missense variant | <i>MT-ND5</i> | MODERATE | p.A292T | 13.33 | Gcc/Acc |                                                |
| <b>m.13248C&gt;A</b> | Missense variant | <i>MT-ND5</i> | MODERATE | p.F304L | 42.86 | ttC/ttA |                                                |
| <b>m.13320C&gt;G</b> | Missense variant | <i>MT-ND5</i> | MODERATE | p.H328Q | 15.91 | caC/caG |                                                |
| <b>m.13362C&gt;G</b> | Missense variant | <i>MT-ND5</i> | MODERATE | p.C342W | 12.24 | tgC/tgG |                                                |
| <b>m.13475T&gt;C</b> | Missense variant | <i>MT-ND5</i> | MODERATE | p.L380S | 75    | tTa/tCa |                                                |
| <b>m.13539A&gt;C</b> | Missense variant | <i>MT-ND5</i> | MODERATE | p.M401I | 11.76 | atA/atC |                                                |
| <b>m.13592C&gt;A</b> | Missense variant | <i>MT-ND5</i> | MODERATE | p.T419K | 14.29 | aCa/aAa |                                                |
| <b>m.13705C&gt;A</b> | Missense variant | <i>MT-ND5</i> | MODERATE | p.L457M | 68.12 | Ctg/Atg |                                                |
| <b>m.13942A&gt;G</b> | Missense variant | <i>MT-ND5</i> | MODERATE | p.T536A | 11.59 | Aca/Gca | rs200657506                                    |
| <b>m.14172T&gt;A</b> | Missense variant | <i>MT-ND6</i> | MODERATE | p.I168F | 12.12 | Att/Ttt |                                                |
| <b>m.14176A&gt;C</b> | Missense variant | <i>MT-ND6</i> | MODERATE | p.I166M | 46.97 | atT/atG |                                                |
| <b>m.14177A&gt;T</b> | Missense variant | <i>MT-ND6</i> | MODERATE | p.I166N | 20    | aTt/aAt |                                                |
| <b>m.14179A&gt;C</b> | Stop-gained      | <i>MT-ND6</i> | HIGH     | p.Y165X | 50.28 | taT/taG |                                                |
| <b>m.14234T&gt;C</b> | Missense variant | <i>MT-ND6</i> | MODERATE | p.D147G | 10.94 | gAt/gGt |                                                |
| <b>m.14397A&gt;C</b> | Missense variant | <i>MT-ND6</i> | MODERATE | p.L93V  | 11.32 | Tta/Gta |                                                |
| <b>m.14805A&gt;G</b> | Missense variant | <i>MT-CYB</i> | MODERATE | p.D20G  | 10.42 | gAc/gGc |                                                |
| <b>m.14834T&gt;A</b> | Stop-gained      | <i>MT-CYB</i> | HIGH     | p.W30X  | 58.46 | Tga/Aga |                                                |
| <b>m.14853T&gt;G</b> | Missense variant | <i>MT-CYB</i> | MODERATE | p.L36R  | 15.38 | cTc/cGc |                                                |
| <b>m.14886C&gt;T</b> | Missense variant | <i>MT-CYB</i> | MODERATE | p.T47M  | 16.13 | aCa/aTa |                                                |
| <b>m.15017T&gt;A</b> | Missense variant | <i>MT-CYB</i> | MODERATE | p.F91I  | 24.14 | Ttt/Att |                                                |
| <b>m.15022C&gt;A</b> | Missense variant | <i>MT-CYB</i> | MODERATE | p.I92M  | 11.11 | atC/atA |                                                |
| <b>m.15039T&gt;A</b> | Missense variant | <i>MT-CYB</i> | MODERATE | p.I98N  | 25.56 | aTc/aAc |                                                |
| <b>m.15053T&gt;C</b> | Missense variant | <i>MT-CYB</i> | MODERATE | p.Y103H | 74.42 | Tat/Cat |                                                |
| <b>m.15080A&gt;T</b> | Missense variant | <i>MT-CYB</i> | MODERATE | p.T112S | 17.24 | Acc/Tcc |                                                |
| <b>m.15486C&gt;G</b> | Missense variant | <i>MT-CYB</i> | MODERATE | p.P247R | 17.14 | cCa/cGa |                                                |
| <b>m.15535C&gt;A</b> | Missense variant | <i>MT-CYB</i> | MODERATE | p.N263K | 40    | aaC/aaA | rs28357371                                     |
| <b>m.15536A&gt;C</b> | Missense variant | <i>MT-CYB</i> | MODERATE | p.T264P | 42.5  | Acc/Ccc |                                                |
| <b>m.15843T&gt;G</b> | Stop-gained      | <i>MT-CYB</i> | HIGH     | p.M366X | 50.88 | aTa/aGa |                                                |

Supplementary table 22: The names and nucleotide sequences of the primers.

| Primer names                  | Sequence                           |
|-------------------------------|------------------------------------|
| <i>Th</i> forward primer      | 5'-GGTATACGCCACGCTGAAGG-3'         |
| <i>Th</i> reverse primer      | 5'-TAGCCACAGTACCGTTCCAGA-3'        |
| <i>Actb</i> forward primer    | 5'-CTGTGTGGATTGGTGGCTTCTAT-3'      |
| <i>Actb</i> reverse primer    | 5'-GTAACAGTCCGCCTAGAAGCAT-3'       |
| <i>Gapdh</i> forward primer   | 5'-AGGTCGGTGTGAACGGATTTG-3'        |
| <i>Gapdh</i> reverse primer   | 5'-TGTAGACCATGTAGTTGAGGTCA-3'      |
| 5741 forward primer           | 5'-TGCAGGAGCATCAGTAGAC-3'          |
| 13144 reverse primer          | 5'-ATGACAAATCCTGCAAAGATG-3'        |
| mt- <i>Nd4</i> forward primer | 5'-AACGGATCCACAGCCGTA-3'           |
| mt- <i>Nd4</i> reverse primer | 5'-AGTCCTCGGGCCCATGATT-3'          |
| D-loop forward primer         | 5'-AATCTACCATCTCCGTGAAACC-3'       |
| D-loop reverse primer         | 5'-TCAGTTTAGCTACCCCAAGTTTAA-3'     |
| MTL-F1                        | 5'- AAA GCA CAT ACC AAG GCC AC -3' |
| MTL-F2                        | 5'- TAT CCG CCA TCC CAT ACA TT -3' |
| MTL-R1                        | 5'- TTG GCT CTC CTT GCA AAG TT -3' |
| MTL-R2                        | 5'- AAT GTT GAG CCG TAG ATG CC -3' |
